# Supplementary material for: Highly selective Markovnikov hydroboration of alkyl-substituted terminal alkenes with a phosphine–copper(i) catalyst
Source: Royal Society of Chemistry journal article supplement (doi:10.1039/c6cc00782a), 2016-01-01
Supplement: c6cc00782a1.pdf [file c6cc00782a1.pdf]

# Highly Selective Markovnikov Hydroboration of Alkyl-Substituted Terminal Alkenes with a Phosphine-Copper(I) Catalyst

Hiroaki Iwamoto, Koji Kubota and Hajime Ito\*

*Division of Applied Chemistry, Graduate School of Engineering, Hokkaido University, Sapporo, Hokkaido, 060-8628, Japan, FAX: +81-(0)11-706-6561*

*e-mail: hajito@eng.hokudai.ac.jp*

## Table of Contents

1. Instrumentation and Chemicals
2. Experimental Procedure
3. Substrate Preparation
4. Borylation Product Characterization
5. The borylation of substrates bearing various functionalities
6. References
7. NMR Spectra

## 1. Instrumentation and Chemicals

Materials were obtained from commercial suppliers and purified by standard procedures unless otherwise noted. Solvents were also purchased from commercial suppliers, degassed via three freeze-pump-thaw cycles, and further dried over molecular sieves (MS 4A). NMR spectra were recorded on JEOL JNM-ECX400P and JNM-ECS400 spectrometers ( $^1\text{H}$ : 400 MHz,  $^{13}\text{C}$ : 100 MHz and  $^{11}\text{B}$ : 127 MHz). Tetramethylsilane ( $^1\text{H}$ ),  $\text{CDCl}_3$  ( $^{13}\text{C}$ ) and  $\text{BF}_3 \cdot \text{OEt}_2$  ( $^{11}\text{B}$ ) were employed as the external standards, respectively. Infrared (IR) spectra were recorded on a JASCO FT/IR-4600 spectrometer.  $\text{CuCl}$  (ReagentPlus® grade, 224332-25G,  $\geq 99\%$ ) and  $\text{K}(\text{O}-t\text{-Bu})$  / THF (1.0 M, 328650-50ML) were purchased from Sigma-Aldrich Co. and used as received. GLC analyses were conducted with a Shimadzu GC-2014 or GC-2025 equipped with a ULBON HR-1 glass capillary column (Shinwa Chemical Industries) and a FID detector. High-resolution mass spectra were recorded at the Global Facility Center, Hokkaido University.

## 2. General Experimental Procedure.

### Procedure for the Copper(I)-Catalyzed Chemoselective Borylation of **1a** (Table 1).

Copper chloride (2.5 mg, 0.025 mmol) and bis(pinacolato)diboron (**2**) (152.4 mg, 0.60 mmol), **L2** (12.6 mg, 0.025 mmol) were placed in an oven-dried reaction vial. After the vial was sealed with a screw cap containing a teflon-coated rubber septum, the vial was connected to a vacuum/nitrogen manifold through a needle. It was evacuated and then backfilled with nitrogen. This cycle was repeated three times. Dry THF (0.4 mL) and K(O-*t*-Bu)/THF (1.0 M, 0.6 mL, 0.6 mmol) were added in the vial through the rubber septum using a syringe. The reaction mixture was stirred at room temperature and cooled down to  $-10\text{ }^{\circ}\text{C}$ . After stirring for 15 min, **1a** (74.5 mg, 0.50 mmol) and methanol were added dropwise to the mixture. After the reaction was complete, the reaction mixture was passed through a silica gel column (radius: 10 mm, height of the column: 30 mm) eluting with Et<sub>2</sub>O. The crude material was purified by flash column chromatography (SiO<sub>2</sub>, CH<sub>2</sub>Cl<sub>2</sub>/pentane, typically 0:100–40:60) to give the corresponding borylation product **3a** as a colorless oil.

### 3. Substrate Preparation

The substrates for asymmetric borylation **1a–1f** were purchased from commercial suppliers.

#### Methyl(pent-4-en-1-yloxy)diphenylsilane (**1g**).

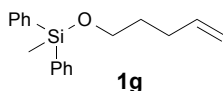

**1g** was prepared from 4-penten-1-ol according to the standard silylation procedure.

<sup>1</sup>H NMR (392 MHz, CDCl<sub>3</sub>,  $\delta$ ): 0.64 (s, 3H), 1.67 (dt,  $J = 7.1, 14.4$  Hz, 2H), 2.12 (q,  $J = 7.0$  Hz, 2H), 3.71 (t,  $J = 6.5$  Hz, 2H), 4.91–5.03 (m, 2H), 5.78 (ddt,  $J = 6.7, 10.3, 17.1$  Hz, 1H), 7.35–7.43 (m, 6H), 7.59 (d,  $J = 7.2$  Hz, 4H). <sup>13</sup>C NMR (99 MHz, CDCl<sub>3</sub>,  $\delta$ ):  $-3.1$  (CH<sub>3</sub>),  $30.0$  (CH<sub>2</sub>),  $31.7$  (CH<sub>2</sub>),  $62.8$  (CH<sub>2</sub>),  $114.6$  (CH<sub>2</sub>),  $127.8$  (CH),  $129.7$  (CH),  $134.3$  (CH),  $136.1$  (C),  $138.2$  (CH). HRMS–EI ( $m/z$ ): [M]<sup>+</sup> calcd for C<sub>18</sub>H<sub>22</sub>OSi, 282.14399; found, 282.14461.

***tert*-Butyl(hex-5-en-1-yloxy)dimethylsilane (1h).<sup>1</sup>**

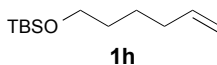

**1h** was prepared from 5-hexen-1-ol according to the standard silylation procedure.

<sup>1</sup>H NMR (392 MHz, CDCl<sub>3</sub>, δ): 0.05 (s, 6H), 0.89 (s, 9H), 1.39–1.47 (m, 2H), 1.50–1.57 (m, 2H), 2.06 (q, *J* = 7.2 Hz, 2H), 3.61 (t, *J* = 6.5 Hz, 2H), 4.92–5.03 (m, 2H), 5.81 (ddt, *J* = 6.7, 10.3, 17.1 Hz, 1H). <sup>13</sup>C NMR (99 MHz, CDCl<sub>3</sub>, δ): –5.3 (CH<sub>3</sub>), 18.3 (C), 25.2 (CH<sub>2</sub>), 25.9 (CH<sub>3</sub>), 32.3 (CH<sub>2</sub>), 33.6 (CH<sub>2</sub>), 63.0 (CH<sub>2</sub>), 114.4 (CH<sub>2</sub>), 138.8 (CH). HRMS–EI (*m/z*): [M–CH<sub>3</sub>]<sup>+</sup> calcd for C<sub>11</sub>H<sub>23</sub>OSi, 199.15182; found, 199.15114.

**[(Hex-5-en-1-yloxy)methyl]benzene (1i).<sup>2</sup>**

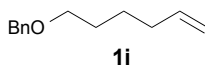

**1i** was prepared from 5-hexen-1-ol according to the standard benzyl protection procedure.

<sup>1</sup>H NMR (392 MHz, CDCl<sub>3</sub>, δ): 1.44–1.52 (m, 2H), 1.60–1.67 (m, 2H), 2.04–2.10 (m, 2H), 3.48 (t, *J* = 6.5 Hz, 2H), 4.50 (s, 2H), 4.93–5.03 (m, 2H), 5.81 (ddt, *J* = 6.7, 10.3, 17.1 Hz, 1H), 7.26–7.37 (m, 5H). <sup>13</sup>C NMR (99 MHz, CDCl<sub>3</sub>, δ): 25.3 (CH<sub>2</sub>), 29.1 (CH<sub>2</sub>), 33.4 (CH<sub>2</sub>), 70.0 (CH<sub>2</sub>), 72.6 (CH<sub>2</sub>), 114.4 (CH<sub>2</sub>), 127.0 (CH), 127.3 (CH), 127.4 (C), 128.1 (CH), 138.5 (CH). HRMS–EI (*m/z*): [M]<sup>+</sup> calcd for C<sub>13</sub>H<sub>18</sub>O, 190.13576; found, 190.13523.

**Dec-9-en-1-yl benzoate (1j).<sup>3</sup>**

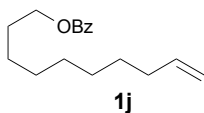

**1j** was prepared from 9-decen-1-ol according to the standard benzoate protection procedure.

<sup>1</sup>H NMR (392 MHz, CDCl<sub>3</sub>, δ): 1.31–1.48 (m, 10H), 1.76 (dt, *J* = 7.1 Hz, 14.4 Hz, 2H), 2.04 (q, *J* = 6.9 Hz, 2H), 4.32 (t, *J* = 6.7 Hz, 2H), 4.91–5.02 (m, 2H), 5.81 (ddt, *J* = 6.7, 10.2, 17.1 Hz, 1H), 7.44 (t, *J* = 7.6 Hz, 2H), 7.54–7.58 (m, 1H), 8.03–8.06 (m, 2H). <sup>13</sup>C NMR (99 MHz, CDCl<sub>3</sub>, δ): 25.9 (CH<sub>2</sub>), 28.6 (CH<sub>2</sub>), 28.8 (CH<sub>2</sub>), 28.9 (CH<sub>2</sub>), 29.1 (CH<sub>2</sub>), 29.3 (CH<sub>2</sub>), 33.7 (CH<sub>2</sub>), 65.0 (CH<sub>2</sub>), 114.1 (CH<sub>2</sub>), 128.2 (CH), 129.4 (CH), 130.4 (C), 132.7 (CH), 139.0 (CH), 166.5 (C). HRMS–EI (*m/z*): [M]<sup>+</sup> calcd for C<sub>17</sub>H<sub>24</sub>O<sub>2</sub>, 260.17763; found, 260.17723.

**10-[(3-Methylbut-2-en-1-yl)oxy]dec-1-ene (1k).**

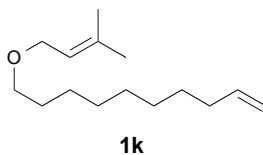

**1k** was prepared from 9-decen-1-ol according to the standard etherification procedure.

$^1\text{H}$  NMR (392 MHz,  $\text{CDCl}_3$ ,  $\delta$ ): 1.29–1.41 (m, 10H), 1.54–1.61 (m, 2H), 1.67 (s, 3H), 1.74 (s, 3H), 2.03 (q,  $J = 7.0$  Hz, 2H), 3.40 (t,  $J = 6.9$  Hz, 2H), 3.94 (d,  $J = 6.9$  Hz, 2H), 4.91–5.02 (m, 2H), 5.33–5.38 (m, 1H), 5.81 (ddt,  $J = 6.9, 10.5, 17.1$  Hz, 1H).  $^{13}\text{C}$  NMR (99 MHz,  $\text{CDCl}_3$ ,  $\delta$ ): 17.9 ( $\text{CH}_3$ ), 25.7 ( $\text{CH}_3$ ), 26.1 ( $\text{CH}_2$ ), 28.8 ( $\text{CH}_2$ ), 29.0 ( $\text{CH}_2$ ), 29.4 ( $\text{CH}_2$ ), 29.7 ( $\text{CH}_2$ ), 33.7 ( $\text{CH}_2$ ), 67.1 ( $\text{CH}_2$ ), 70.2 ( $\text{CH}_2$ ), 114.0 ( $\text{CH}_2$ ), 121.3 (CH), 136.4 (C), 139.0 (CH). HRMS–EI ( $m/z$ ):  $[\text{M}]^+$  calcd for  $\text{C}_{15}\text{H}_{28}\text{O}$ , 224.21401; found, 224.21380.

**4. Characterization of Borylation Products**

**4,4,5,5-Tetramethyl-2-(4-phenylbutan-2-yl)-1,3,2-dioxaborolane (3a).<sup>4</sup>**

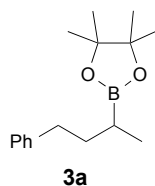

$^1\text{H}$  NMR (392 MHz,  $\text{CDCl}_3$ ,  $\delta$ ): 1.01–1.11 (m, 4H), 1.25 (s, 12H), 1.54–1.63 (m, 1H), 1.74–1.83 (m, 1H), 2.56–2.67 (m, 2H), 7.14–7.20 (m, 3H), 7.25–7.28 (m, 2H).  $^{13}\text{C}$  NMR (99 MHz,  $\text{CDCl}_3$ ,  $\delta$ ): 15.4 ( $\text{CH}_3$ ), 16.8 (br, B–CH), 24.7 ( $\text{CH}_3$ ), 24.8 ( $\text{CH}_3$ ), 35.3 ( $\text{CH}_2$ ), 82.9 (C), 125.5 (CH), 128.2 (CH), 128.4 (CH), 143.0 (C).  $^{11}\text{B}$  NMR (127 MHz,  $\text{CDCl}_3$ ,  $\delta$ ): 34.2. FT-IR (neat):  $\nu_{\text{max}} = 2976, 1370, 1315, 1145, 699\text{ cm}^{-1}$ . HRMS–EI ( $m/z$ ):  $[\text{M}]^+$  calcd for  $\text{C}_{16}\text{H}_{25}\text{BO}_2$ , 260.19476; found, 260.19437.

**2-(Decan-2-yl)-4,4,5,5-tetramethyl-1,3,2-dioxaborolane (3b).**

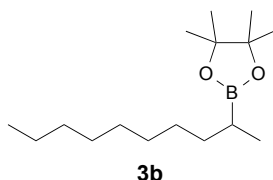

$^1\text{H}$  NMR (392 MHz,  $\text{CDCl}_3$ ,  $\delta$ ): 0.88 (t,  $J = 6.7$  Hz, 3H), 0.95–1.01 (m, 4H), 1.20–1.29 (m, 25H), 1.40–1.46 (m, 1H).  $^{13}\text{C}$  NMR (99 MHz,  $\text{CDCl}_3$ ,  $\delta$ ): 14.1 ( $\text{CH}_3$ ), 15.5 ( $\text{CH}_3$ ), 16.8 (br, B–CH), 22.7 ( $\text{CH}_2$ ), 24.67 ( $\text{CH}_3$ ), 24.71 ( $\text{CH}_3$ ), 29.0 ( $\text{CH}_2$ ), 29.3 ( $\text{CH}_2$ ), 29.6 ( $\text{CH}_2$ ), 29.8 ( $\text{CH}_2$ ), 31.9 ( $\text{CH}_2$ ), 33.2 ( $\text{CH}_2$ ), 82.7 (C).  $^{11}\text{B}$  NMR (127 MHz,  $\text{CDCl}_3$ ,  $\delta$ ): 34.3. FT-IR (neat):  $\nu_{\text{max}} = 2923, 1370, 1312, 1144, 860\text{ cm}^{-1}$ . HRMS–EI ( $m/z$ ):  $[\text{M}]^+$  calcd for  $\text{C}_{16}\text{H}_{33}\text{BO}_2$ , 268.25736; found, 268.25827.

**2-(1-Cyclohexylpropan-2-yl)-4,4,5,5-tetramethyl-1,3,2-dioxaborolane (3c).**

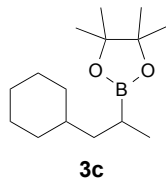

<sup>1</sup>H NMR (392 MHz, CDCl<sub>3</sub>, δ): 0.74–0.89 (m, 2H), 0.93 (d, *J* = 7.3 Hz, 3H), 1.06–1.40 (m, 20H), 1.60–1.70 (m, 4H). <sup>13</sup>C NMR (99 MHz, CDCl<sub>3</sub>, δ): 14.1 (br, B–CH), 15.7 (CH<sub>3</sub>), 24.7 (CH<sub>3</sub>), 26.4 (CH<sub>2</sub>), 26.5 (CH<sub>2</sub>), 26.7 (CH<sub>2</sub>), 33.1 (CH<sub>2</sub>), 33.6 (CH<sub>2</sub>), 36.5 (CH), 40.8 (CH<sub>2</sub>), 82.7 (C). <sup>11</sup>B NMR (127 MHz, CDCl<sub>3</sub>, δ): 34.3. FT-IR (neat):  $\nu_{\text{max}}$  = 2920, 1369, 1312, 1144, 861 cm<sup>-1</sup>. HRMS–EI (*m/z*): [M]<sup>+</sup> calcd for, C<sub>15</sub>H<sub>29</sub>BO<sub>2</sub>, 252.22606; found, 252.22711.

**2-(1-Cyclohexylethyl)-4,4,5,5-tetramethyl-1,3,2-dioxaborolane (3d).<sup>5</sup>**

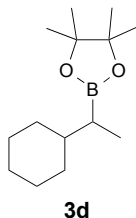

<sup>1</sup>H NMR (392 MHz, CDCl<sub>3</sub>, δ): 0.86–1.40 (m, 22H), 1.62–1.75 (m, 5H). <sup>13</sup>C NMR (99 MHz, CDCl<sub>3</sub>, δ): 12.5 (CH<sub>3</sub>), 24.7 (CH<sub>3</sub>), 24.8 (CH<sub>3</sub>), 26.69 (CH<sub>2</sub>), 26.75 (CH<sub>2</sub>), 31.8 (CH<sub>2</sub>), 32.7 (CH<sub>2</sub>), 40.4 (CH), 82.7 (C). The carbon directly attached to the boron atom was not detected, likely due to quadrupolar relaxation. <sup>11</sup>B NMR (127 MHz, CDCl<sub>3</sub>, δ): 34.1. FT-IR (neat):  $\nu_{\text{max}}$  = 2921, 1358, 1310, 1143, 863 cm<sup>-1</sup>. HRMS–EI (*m/z*): [M]<sup>+</sup> calcd for, C<sub>14</sub>H<sub>27</sub>BO<sub>2</sub>, 238.21041; found, 238.21127.

**2-(6-Chlorohexan-2-yl)-4,4,5,5-tetramethyl-1,3,2-dioxaborolane (3f).<sup>5</sup>**

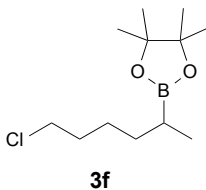

<sup>1</sup>H NMR (392 MHz, CDCl<sub>3</sub>, δ): 0.96–1.08 (m, 4H), 1.24–1.35 (m, 13H), 1.38–1.50 (m, 3H), 1.76 (dt, *J* = 7.1 Hz, 14.1 Hz, 2H), 3.53 (t, *J* = 6.7 Hz, 2H). <sup>13</sup>C NMR (99 MHz, CDCl<sub>3</sub>, δ): 15.4 (CH<sub>3</sub>), 16.9 (br, B–CH), 24.67 (CH<sub>3</sub>), 24.72 (CH<sub>3</sub>), 26.2 (CH<sub>2</sub>), 32.3 (CH<sub>2</sub>), 32.8 (CH<sub>2</sub>), 45.1 (CH<sub>2</sub>), 82.8 (C). <sup>11</sup>B NMR (127 MHz, CDCl<sub>3</sub>, δ): 34.2. FT-IR (neat):  $\nu_{\text{max}}$  = 2931, 1370, 1313, 1143, 857 cm<sup>-1</sup>. HRMS–EI (*m/z*): [M]<sup>+</sup> calcd for C<sub>12</sub>H<sub>24</sub>BClO<sub>2</sub>, 246.15579; found, 246.15550.

**Methyldiphenyl{[4-(4,4,5,5-tetramethyl-1,3,2-dioxaborolan-2-yl)pentyl]oxy}silane (3g).**

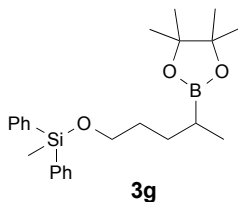

$^1\text{H}$  NMR (392 MHz,  $\text{CDCl}_3$ ,  $\delta$ ): 0.63 (s, 3H), 0.93–1.01 (m, 4H), 1.22–1.50 (m, 14H), 1.55–1.64 (m, 2H), 3.68 (t,  $J = 7.0$  Hz, 2H), 7.34–7.43 (m, 6H), 7.58–7.60 (m, 4H).  $^{13}\text{C}$  NMR (99 MHz,  $\text{CDCl}_3$ ,  $\delta$ ): –3.0 ( $\text{CH}_3$ ), 15.5 ( $\text{CH}_3$ ), 16.7 (br, B–CH), 24.6 ( $\text{CH}_3$ ), 24.7 ( $\text{CH}_3$ ), 29.2 ( $\text{CH}_2$ ), 31.9 ( $\text{CH}_2$ ), 63.8 ( $\text{CH}_2$ ), 82.7 (C), 127.7 (CH), 129.6 (CH), 134.3 (CH), 136.2 (C).  $^{11}\text{B}$  NMR (127 MHz,  $\text{CDCl}_3$ ,  $\delta$ ): 34.1. FT-IR (neat):  $\nu_{\text{max}} = 2928, 1315, 1145, 1118, 736\text{ cm}^{-1}$ . HRMS–EI ( $m/z$ ):  $[\text{M}]^+$  calcd for,  $\text{C}_{24}\text{H}_{35}\text{BO}_3\text{Si}$ , 410.24485; found, 410.24413.

***tert*-Butyldimethyl{[5-(4,4,5,5-tetramethyl-1,3,2-dioxaborolan-2-yl)hexyl]oxy}silane (3h).**

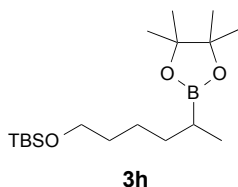

$^1\text{H}$  NMR (392 MHz,  $\text{CDCl}_3$ ,  $\delta$ ): 0.04 (s, 6H), 0.89 (s, 9H), 0.95–1.07 (m, 4H), 1.23–1.54 (m, 18H), 3.59 (t,  $J = 6.5$  Hz, 2H).  $^{13}\text{C}$  NMR (99 MHz,  $\text{CDCl}_3$ ,  $\delta$ ): –5.3 ( $\text{CH}_3$ ), 15.5 ( $\text{CH}_3$ ), 16.9 (br, B–CH), 18.3 (C), 24.68 ( $\text{CH}_3$ ), 24.72 ( $\text{CH}_3$ ), 25.2 ( $\text{CH}_2$ ), 26.0 ( $\text{CH}_3$ ), 33.0 ( $\text{CH}_2$ ), 33.1 ( $\text{CH}_2$ ), 63.3 ( $\text{CH}_2$ ), 82.7 (C).  $^{11}\text{B}$  NMR (127 MHz,  $\text{CDCl}_3$ ,  $\delta$ ): 34.2. FT-IR (neat):  $\nu_{\text{max}} = 2929, 1313, 1145, 1097, 834\text{ cm}^{-1}$ . HRMS–EI ( $m/z$ ):  $[\text{M}-\text{CH}_3]^+$  calcd for  $\text{C}_{17}\text{H}_{36}\text{BO}_3\text{Si}$ , 327.25268; found, 327.25236.

**2-[6-(Benzyloxy)hexan-2-yl]-4,4,5,5-tetramethyl-1,3,2-dioxaborolane (3i).**

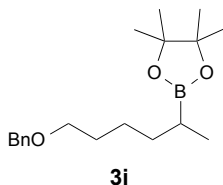

$^1\text{H}$  NMR (392 MHz,  $\text{CDCl}_3$ ,  $\delta$ ): 0.94–1.07 (m, 4H), 1.23–1.51 (m, 16H), 1.57–1.65 (m, 2H), 3.46 (t,  $J = 6.7$  Hz, 2H), 4.50 (s, 2H), 7.25–7.34 (m, 5H).  $^{13}\text{C}$  NMR (99 MHz,  $\text{CDCl}_3$ ,  $\delta$ ): 15.4 ( $\text{CH}_3$ ), 16.9 (br, B–CH), 24.61 ( $\text{CH}_3$ ), 24.65 ( $\text{CH}_3$ ), 25.4 ( $\text{CH}_2$ ), 29.9 ( $\text{CH}_2$ ), 32.9 ( $\text{CH}_2$ ), 70.4 ( $\text{CH}_2$ ), 72.7 ( $\text{CH}_2$ ), 82.7 (C), 127.3 (CH), 127.4 (CH), 128.2 (CH), 138.7 (C).  $^{11}\text{B}$  NMR (127 MHz,  $\text{CDCl}_3$ ,  $\delta$ ): 34.2. FT-IR (neat):  $\nu_{\text{max}} = 3064, 1369, 1313, 1144, 697\text{ cm}^{-1}$ . HRMS–EI ( $m/z$ ):  $[\text{M}]^+$  calcd for,  $\text{C}_{19}\text{H}_{31}\text{BO}_3$ , 318.23662; found, 318.23709.

**9-(4,4,5,5-Tetramethyl-1,3,2-dioxaborolan-2-yl)decyl benzoate (3j).**

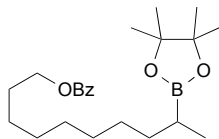

**3j**

$^1\text{H}$  NMR (392 MHz,  $\text{CDCl}_3$ ,  $\delta$ ): 0.95–1.01 (m, 4H), 1.23–1.47 (m, 24H), 1.76 (dt,  $J = 7.1$  Hz, 14.4 Hz, 2H), 4.31 (t,  $J = 6.7$  Hz, 2H), 7.44 (t,  $J = 7.6$  Hz, 2H), 7.53–7.58 (m, 1H), 8.03–8.06 (m, 2H).  $^{13}\text{C}$  NMR (99 MHz,  $\text{CDCl}_3$ ,  $\delta$ ): 15.4 ( $\text{CH}_3$ ), 16.8 (br, B–CH), 24.60 ( $\text{CH}_3$ ), 24.64 ( $\text{CH}_3$ ), 25.9 ( $\text{CH}_2$ ), 28.6 ( $\text{CH}_2$ ), 28.8 ( $\text{CH}_2$ ), 29.2 ( $\text{CH}_2$ ), 29.4 ( $\text{CH}_2$ ), 29.7 ( $\text{CH}_2$ ), 33.1 ( $\text{CH}_2$ ), 65.0 ( $\text{CH}_2$ ), 82.6 (C), 128.2 (CH), 129.4 (CH), 130.4 (C), 132.6 (CH), 166.5 (C).  $^{11}\text{B}$  NMR (127 MHz,  $\text{CDCl}_3$ ,  $\delta$ ): 34.2. FT-IR (neat):  $\nu_{\text{max}} = 2924, 1720, 1273, 1145, 713\text{ cm}^{-1}$ . HRMS–EI ( $m/z$ ):  $[\text{M}]^+$  calcd for,  $\text{C}_{23}\text{H}_{37}\text{BO}_4$ , 388.27849; found, 388.27830.

**4,4,5,5-Tetramethyl-2-{10-[(3-methylbut-2-en-1-yl)oxy]decan-2-yl}-1,3,2-dioxaborolane (3k).**

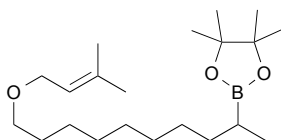

**3k**

$^1\text{H}$  NMR (392 MHz,  $\text{CDCl}_3$ ,  $\delta$ ): 0.95–1.03 (m, 4H), 1.24–1.46 (m, 24H), 1.53–1.60 (m, 2H), 1.67 (s, 3H), 1.74 (s, 3H), 3.39 (t,  $J = 7.0$  Hz, 2H), 3.94 (d,  $J = 6.7$  Hz, 2H), 5.33–5.38 (m, 1H).  $^{13}\text{C}$  NMR (99 MHz,  $\text{CDCl}_3$ ,  $\delta$ ): 15.4 ( $\text{CH}_3$ ), 16.8 (br, B–CH), 17.9 ( $\text{CH}_3$ ), 24.58 ( $\text{CH}_3$ ), 24.61 ( $\text{CH}_3$ ), 25.7 ( $\text{CH}_3$ ), 26.1 ( $\text{CH}_2$ ), 28.8 ( $\text{CH}_2$ ), 29.36 ( $\text{CH}_2$ ), 29.45 ( $\text{CH}_2$ ), 29.68 ( $\text{CH}_2$ ), 29.72 ( $\text{CH}_2$ ), 33.1 ( $\text{CH}_2$ ), 67.1 ( $\text{CH}_2$ ), 70.3 ( $\text{CH}_2$ ), 82.6 (C), 121.3 (CH), 136.4 (C).  $^{11}\text{B}$  NMR (127 MHz,  $\text{CDCl}_3$ ,  $\delta$ ): 34.2. FT-IR (neat):  $\nu_{\text{max}} = 2925, 1370, 1313, 1144, 859\text{ cm}^{-1}$ . HRMS–EI ( $m/z$ ):  $[\text{M}]^+$  calcd for,  $\text{C}_{21}\text{H}_{41}\text{BO}_3$ , 352.31487; found, 352.31532.

## 5. The results of substrates bearing various functionalities

Table S1 Copper(I)-catalyzed hydroboration of terminal alkenes bearing various functionalities<sup>a</sup>

| $  \begin{array}{c}  \text{R}-\text{CH}=\text{CH}_2 \\  \mathbf{1}  \end{array}  \xrightarrow[  \begin{array}{l}  \text{K(O-}t\text{-Bu)} (1.2 \text{ equiv}) \\  \text{MeOH} (2.0 \text{ equiv}) \\  \text{THF, } -10^\circ\text{C, 24 h}  \end{array}  ]{  \begin{array}{l}  5 \text{ mol \% CuCl / L2} \\  \mathbf{2} (1.2 \text{ equiv})  \end{array}  }  \begin{array}{c}  \text{B(pin)} \\    \\  \text{R}-\text{CH}-\text{CH}_3 \\  \mathbf{3}  \end{array}  +  \begin{array}{c}  \text{R}-\text{CH}_2-\text{CH}_2-\text{B(pin)} \\  \mathbf{4}  \end{array}  $ |                                                                                                  |                                                                                                  |                        |                  |
|------------------------------------------------------------------------------------------------------------------------------------------------------------------------------------------------------------------------------------------------------------------------------------------------------------------------------------------------------------------------------------------------------------------------------------------------------------------------------------------------------------------------------------------------------------------------|--------------------------------------------------------------------------------------------------|--------------------------------------------------------------------------------------------------|------------------------|------------------|
| entry                                                                                                                                                                                                                                                                                                                                                                                                                                                                                                                                                                  | substrate                                                                                        | product                                                                                          | yield (%) <sup>b</sup> | 3/4 <sup>c</sup> |
| 1                                                                                                                                                                                                                                                                                                                                                                                                                                                                                                                                                                      | <br><b>1l</b>   | no reaction                                                                                      |                        |                  |
| 2                                                                                                                                                                                                                                                                                                                                                                                                                                                                                                                                                                      | <br><b>1m</b>   | <br><b>3m</b>   | (<5)                   | -                |
| 3                                                                                                                                                                                                                                                                                                                                                                                                                                                                                                                                                                      | <br><b>1n</b>  | <br><b>3n</b>  | (12)                   | 90:10            |
| 4                                                                                                                                                                                                                                                                                                                                                                                                                                                                                                                                                                      | <br><b>1o</b> | <br><b>3o</b> | 75 (86)                | 96:4             |
| 5                                                                                                                                                                                                                                                                                                                                                                                                                                                                                                                                                                      | <br><b>1p</b> | <br><b>4p</b> | 39 (53)                | <1:99            |

<sup>a</sup>Conditions: **1** (0.5 mmol), CuCl (0.025 mmol), **L2** (0.025 mmol), **2** (0.6 mmol) and K(O-*t*-Bu) (0.6 mmol) in THF (1.0 mL) at  $-10^\circ\text{C}$ . <sup>b</sup>Isolated yield. The NMR yields are shown in parenthesis

<sup>c</sup>Determined by GC analysis of the crude material.

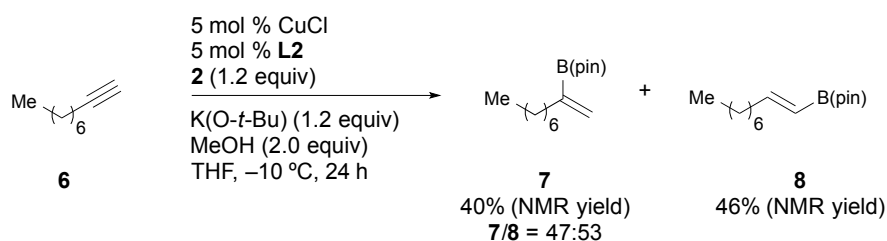

Scheme S1. Copper(I)-catalyzed hydroboration of alkyne.



## 6. References

- 1 J. A. Marshall, J. J. Sabatini and F. Valeriote, *Bioorganic Med. Chem. Lett.*, 2007, **17**, 2434–2437.
- 2 V. Rawat, P. V. Chouthaiwale, G. Suryavanshi and A. Sudalai, *Tetrahedron Asymmetry*, 2009, **20**, 2173–2177.
- 3 C. Luján and S. P. Nolan, *J. Organomet. Chem.*, 2011, **696**, 3935–3938.
- 4 A. S. Dudnik and G. C. Fu, *J. Am. Chem. Soc.*, 2012, **134**, 10693–10697.
- 5 A. Ganić and A. Pfaltz, *Chem. - Eur. J.*, 2012, **18**, 6724–6728.

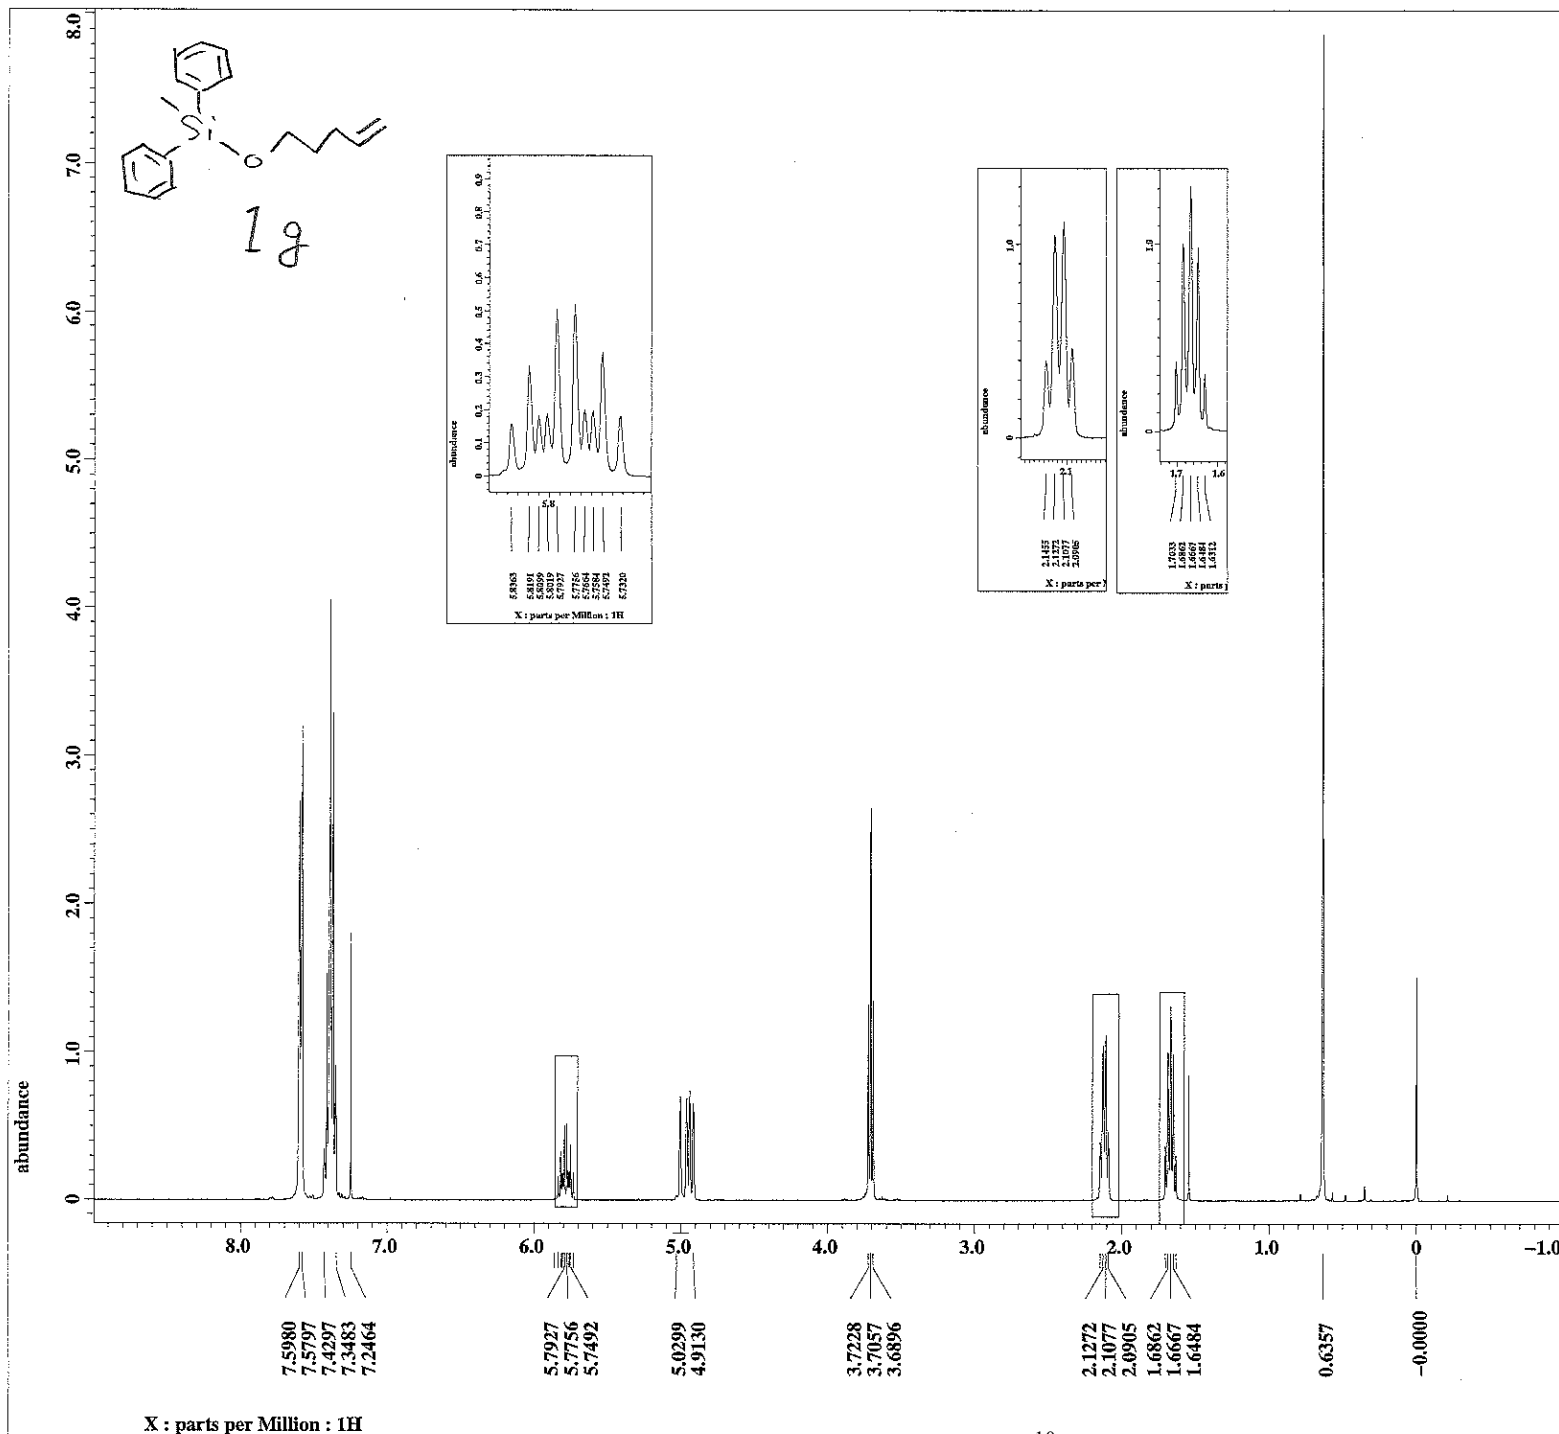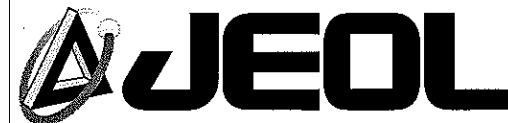

----- PROCESSING PARAMETERS -----  
 dc\_balance : 0 : FALSE  
 secp : 0.2[Hz] : 0.0[s]  
 trapezoid3 : 0[%] : 80[%] : 100[%]  
 zerofill : 1  
 fft : 1 : TRUE : TRUE  
 machinephase  
 ppm

Derived from: IWA-818-pure1-1.jdf

Filename = IWA-818-pure1-4.jdf  
 Author = element  
 Experiment = single\_pulse.ex2  
 Sample\_id = S#712482  
 Solvent = CHLOROFORM-D  
 Creation\_time = 24-OCT-2015 19:17:07  
 Revision\_time = 24-OCT-2015 19:55:34  
 Current\_time = 24-OCT-2015 19:55:38

Comment = single\_pulse  
 Data\_format = 1D COMPLEX  
 Dim\_size = 13107  
 Dim\_title = 1H  
 Dim\_units = [ppm]  
 Dimensions = X  
 Site = ECS 400  
 Spectrometer = JNM-ECS400

Field\_strength = 9.20197068[T] (390[MH  
 X\_acq\_duration = 2.228224[s]  
 X\_domain = 1H  
 X\_freq = 391.78655441[MHz]  
 X\_offset = 5[ppm]  
 X\_points = 16384  
 X\_prescans = 1  
 X\_resolution = 0.44878791[Hz]  
 X\_sweep = 7.35294118[kHz]  
 Irr\_domain = 1H  
 Irr\_freq = 391.78655441[MHz]  
 Irr\_offset = 5[ppm]  
 Tri\_domain = 1H  
 Tri\_freq = 391.78655441[MHz]  
 Tri\_offset = 5[ppm]  
 Clipped = FALSE  
 Mod\_return = 1  
 Scans = 8  
 Total\_scans = 8

X\_90\_width = 10.7[us]  
 X\_acq\_time = 2.228224[s]  
 X\_angle = 45[deg]  
 X\_atn = 1.9[dB]  
 X\_pulse = 5.35[us]  
 Irr\_mode = Off  
 Tri\_mode = Off  
 Dante\_presat = FALSE  
 Initial\_wait = 1[s]  
 Recvr\_gain = 38  
 Relaxation\_delay = 5[s]  
 Repetition\_time = 7.228224[s]  
 Temp\_get = 18.3[dc]

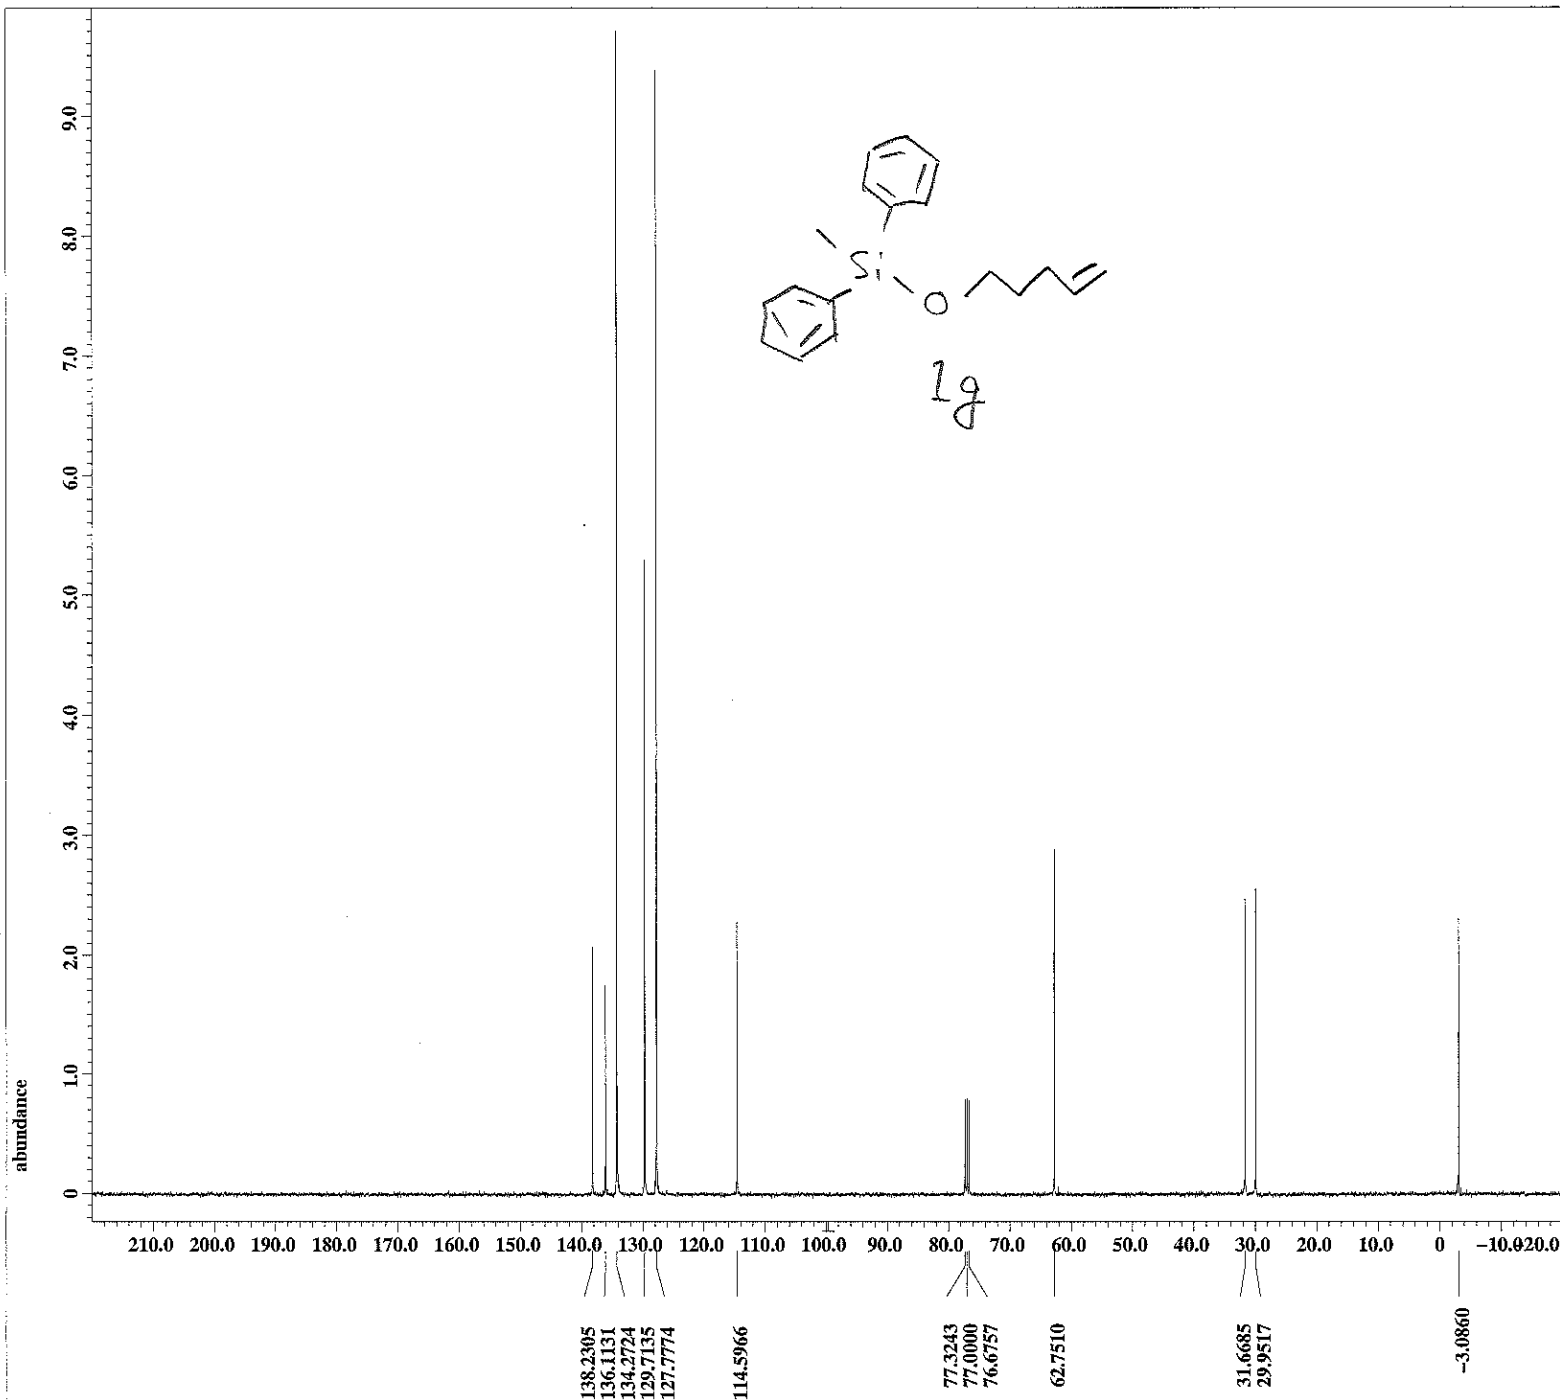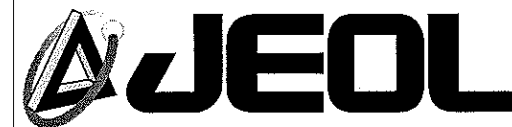

----- PROCESSING PARAMETERS -----  
 dc\_balance : 0 : FALSE  
 secp : 2.0 [Hz] : 0.0 [s]  
 trapezoid3 : 0 [%] : 80 [%] : 100 [%]  
 zerofill : 1  
 fft : 1 : TRUE : TRUE  
 machinephase  
 ppm

Derived from: IWA-818-carbon-1.jdf

Filename = IWA-818-carbon-4.jdf  
 Author = element  
 Experiment = single\_pulse\_dec  
 Sample\_id = S#716322  
 Solvent = CHLOROFORM-D  
 Creation\_time = 24-OCT-2015 19:25:18  
 Revision\_time = 24-OCT-2015 19:58:28  
 Current\_time = 24-OCT-2015 19:59:04

Comment = single pulse decouple  
 Data\_format = 1D COMPLEX  
 Dim\_size = 26214  
 Dim\_title = 13C  
 Dim\_units = [ppm]  
 Dimensions = X  
 Site = ECS 400  
 Spectrometer = JNM-ECS400

Field\_strength = 9.20197068 [T] (390 [MH  
 X\_acq\_duration = 1.06430464 [s]  
 X\_domain = 13C  
 X\_freq = 98.51479726 [MHz]  
 X\_offset = 100 [ppm]  
 X\_points = 32768  
 X\_prescans = 4  
 X\_resolution = 0.93958061 [Hz]  
 X\_sweep = 30.78817734 [kHz]  
 Irr\_domain = 1H  
 Irr\_freq = 391.78655441 [MHz]  
 Irr\_offset = 5 [ppm]  
 Clipped = FALSE  
 Mod\_return = 1  
 Scans = 59  
 Total\_scans = 59

X\_90\_width = 8.8 [us]  
 X\_acq\_time = 1.06430464 [s]  
 X\_angle = 30 [deg]  
 X\_atn = 4.9 [dB]  
 X\_pulse = 2.93333333 [us]  
 Irr\_atn\_dec = 22.52628 [dB]  
 Irr\_atn\_noe = 22.52628 [dB]  
 Irr\_noise = WALTZ  
 Decoupling = TRUE  
 Initial\_wait = 1 [s]  
 Noe = TRUE  
 Noe\_time = 2 [s]  
 Recvr\_gain = 60  
 Relaxation\_delay = 2 [s]  
 Repetition\_time = 3.06430464 [s]  
 Temp\_get = 18.4 [dC]

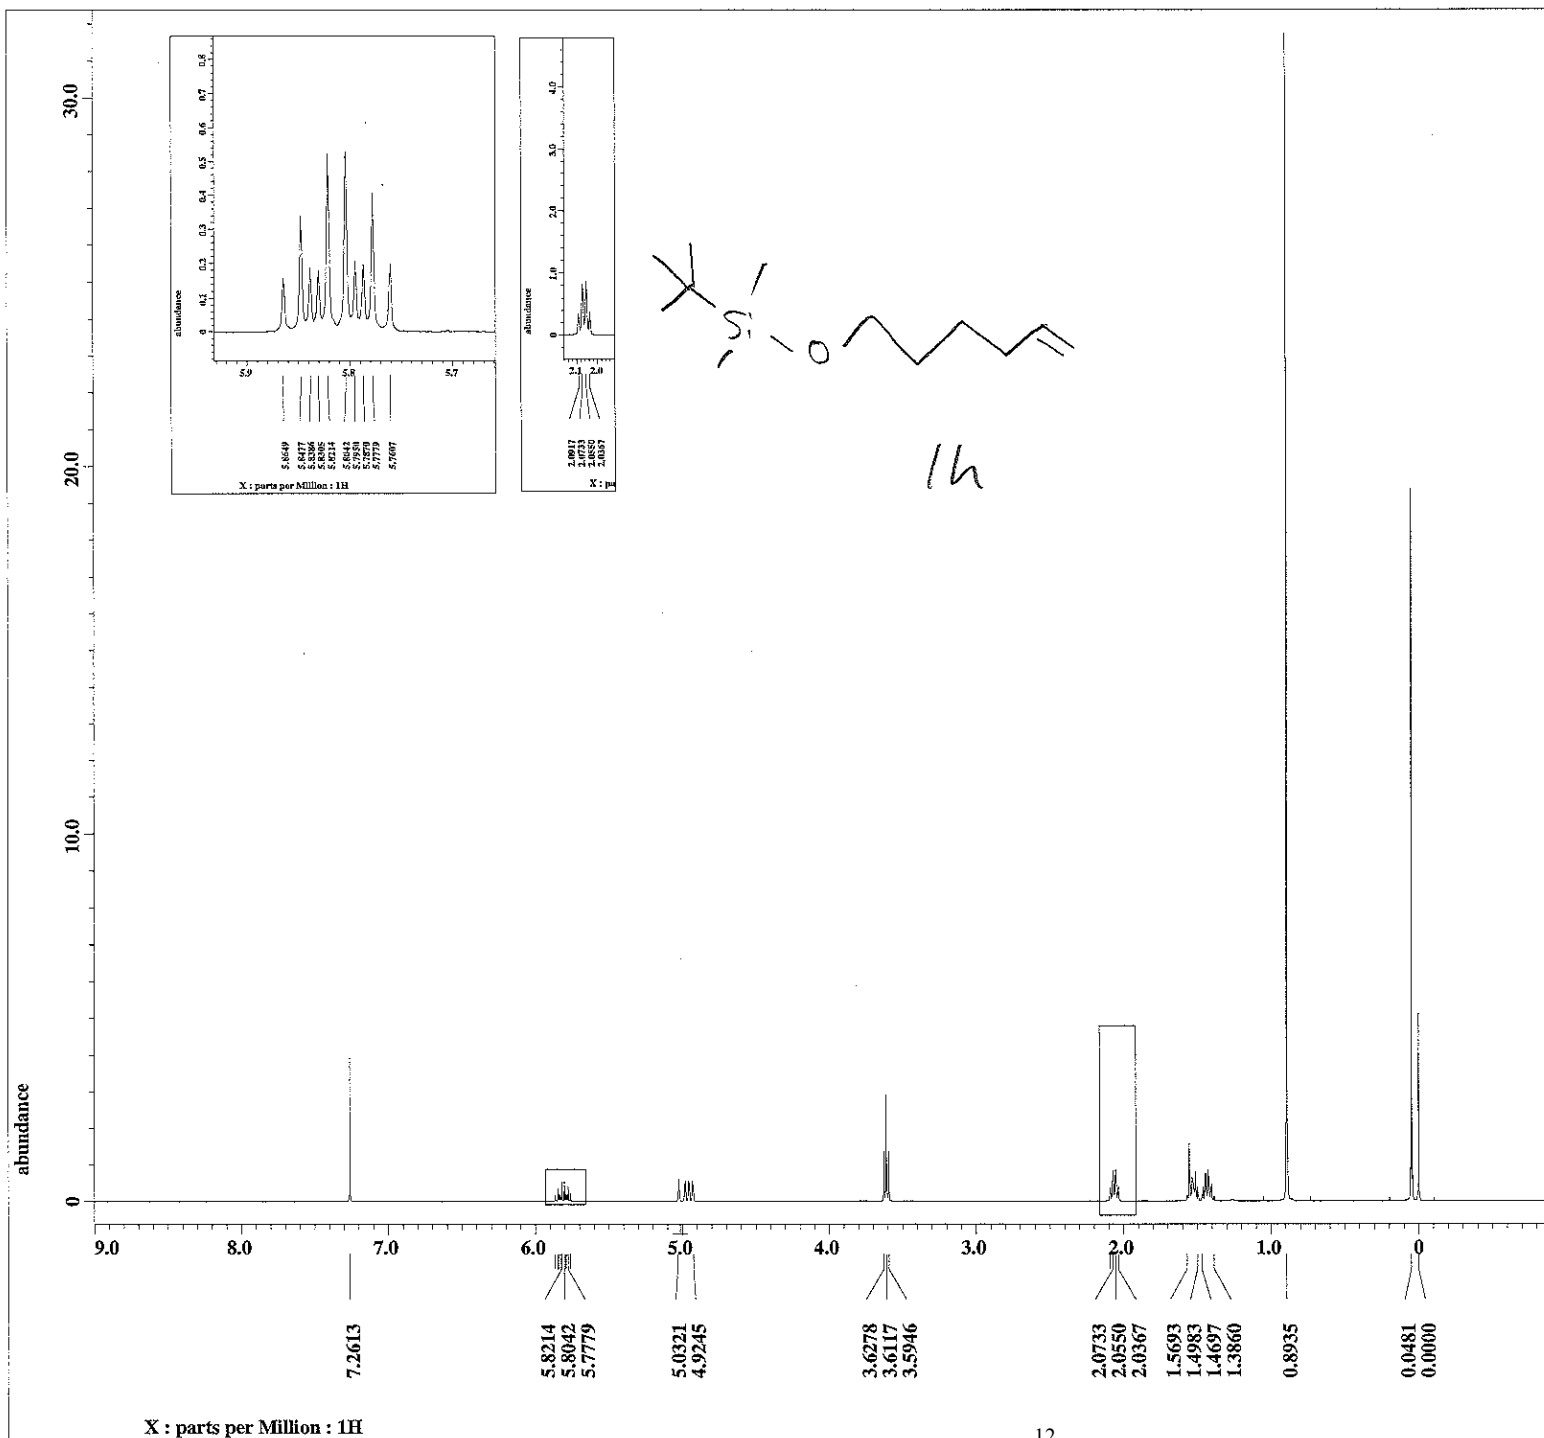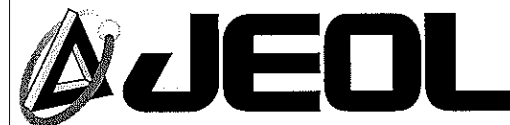

----- PROCESSING PARAMETERS -----  
 dc\_balance : 0 : FALSE  
 secp : 0.2[Hz] : 0.0[s]  
 trapezoid3 : 0[%] : 80[%] : 100[%]  
 zerofill : 1  
 fft : 1 : TRUE : TRUE  
 machinephase  
 ppm

Derived from: IWA-766-pure1-1.jdf

Filename = IWA-766-pure1-3.jdf  
 Author = element  
 Experiment = single\_pulse.ex2  
 Sample\_id = S#684985  
 Solvent = CHLOROFORM-D  
 Creation\_time = 24-OCT-2015 18:31:18  
 Revision\_time = 23-JAN-2016 19:54:09  
 Current\_time = 23-JAN-2016 19:54:11

Comment = single\_pulse  
 Data\_format = 1D COMPLEX  
 Dim\_size = 13107  
 Dim\_title = 1H  
 Dim\_units = [ppm]  
 Dimensions = X  
 Site = ECS 400  
 Spectrometer = JNM-ECS400

Field\_strength = 9.20197068[T] (390[MH  
 X\_acq\_duration = 2.228224[s]  
 X\_domain = 1H  
 X\_freq = 391.78655441[MHz]  
 X\_offset = 5[ppm]  
 X\_points = 16384  
 X\_prescans = 1  
 X\_resolution = 0.44878791[Hz]  
 X\_sweep = 7.35294118[kHz]  
 Irr\_domain = 1H  
 Irr\_freq = 391.78655441[MHz]  
 Irr\_offset = 5[ppm]  
 Tri\_domain = 1H  
 Tri\_freq = 391.78655441[MHz]  
 Tri\_offset = 5[ppm]  
 Clipped = FALSE  
 Mod\_return = 1  
 Scans = 8  
 Total\_scans = 8

X\_90\_width = 10.7[us]  
 X\_acq\_time = 2.228224[s]  
 X\_angle = 45[deg]  
 X\_atn = 1.9[dB]  
 X\_pulse = 5.35[us]  
 Irr\_mode = Off  
 Tri\_mode = Off  
 Dante\_presat = FALSE  
 Initial\_wait = 1[s]  
 Recvr\_gain = 44  
 Relaxation\_delay = 5[s]  
 Repetition\_time = 7.228224[s]  
 Temp\_get = 19.6[degC]

X : parts per Million : 1H

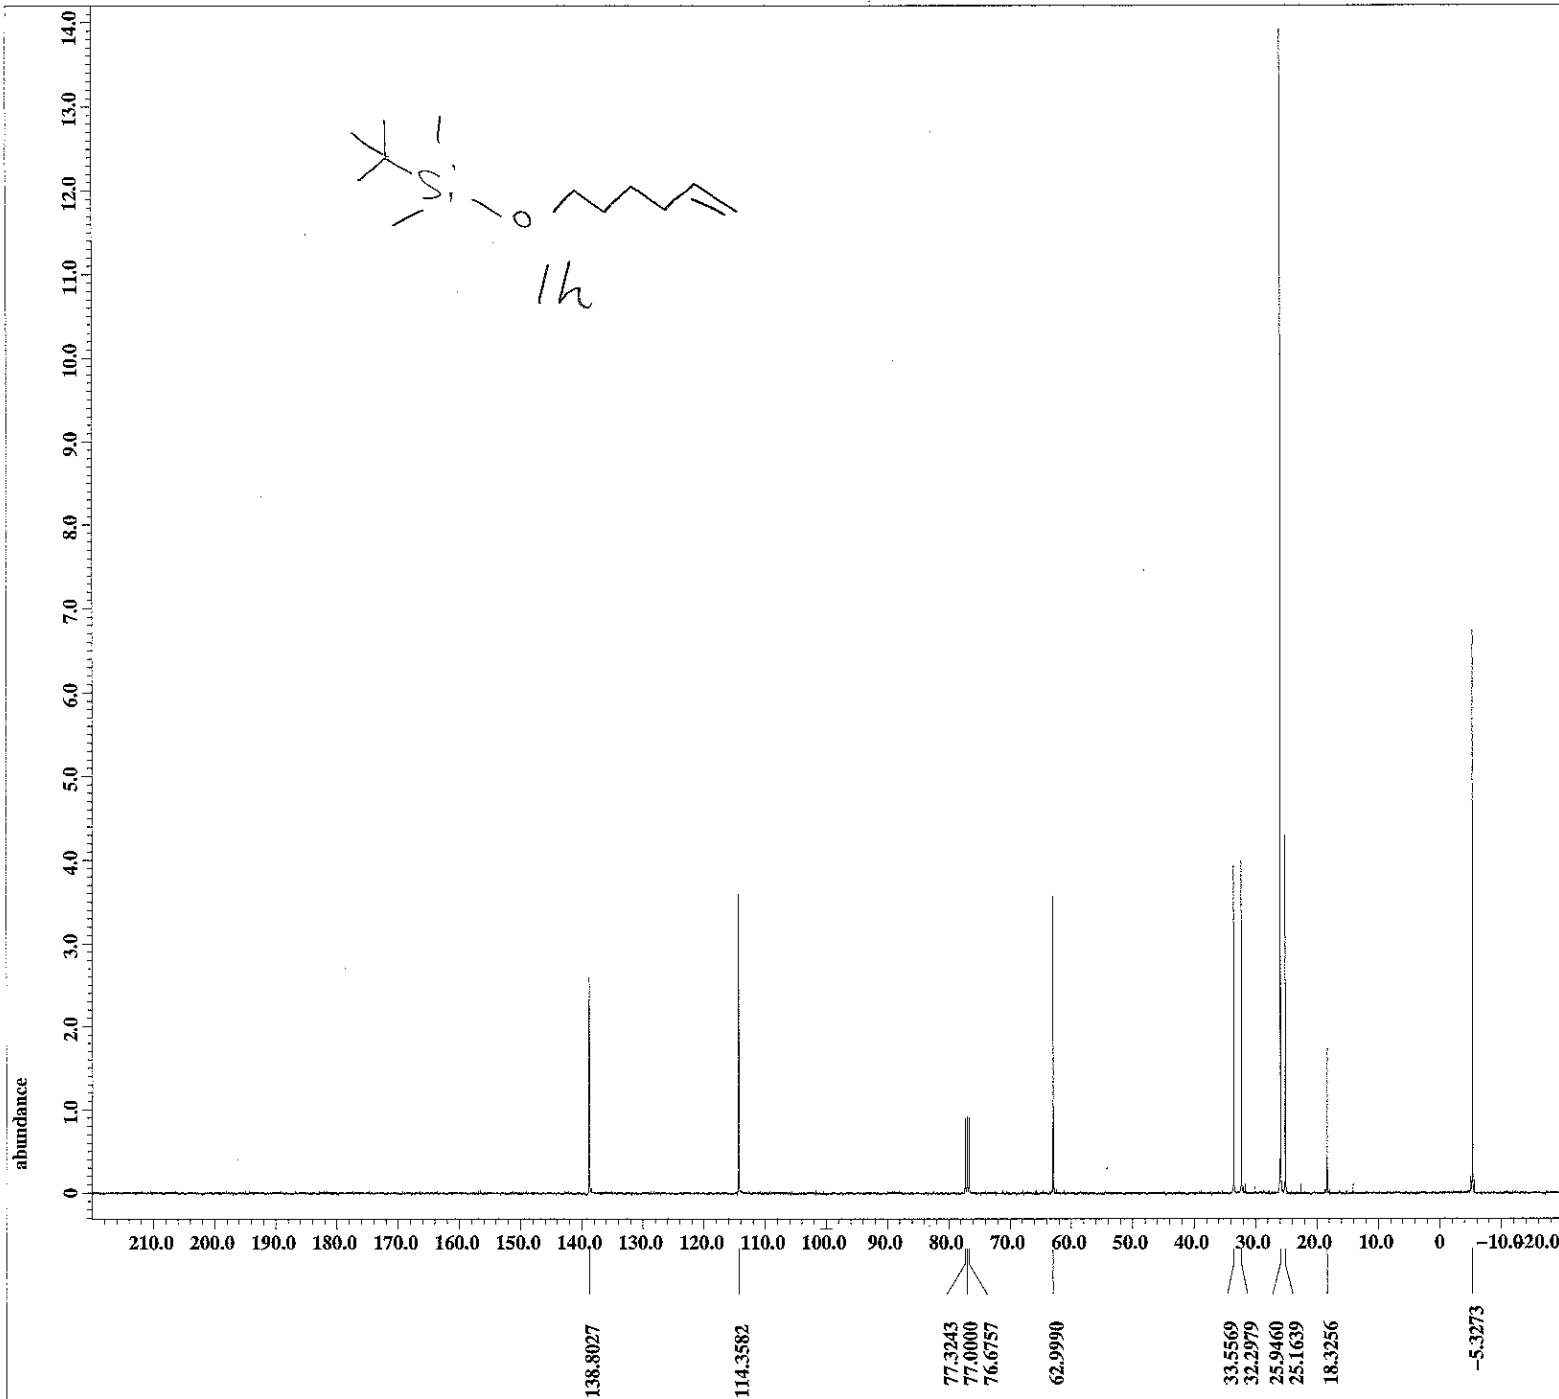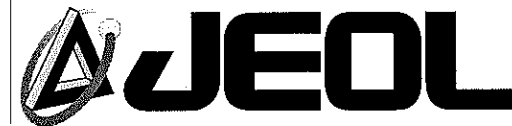

----- PROCESSING PARAMETERS -----  
 dc\_balance : 0 : FALSE  
 secp : 2.0[Hz] : 0.0[s]  
 trapezoid3 : 0[%] : 80[%] : 100[%]  
 zerofill : 1  
 fft : 1 : TRUE : TRUE  
 machinephase  
 ppm

Derived from: IWA-766-carbon-1.jdf

Filename = IWA-766-carbon-3.jdf  
 Author = element  
 Experiment = single\_pulse\_dec  
 Sample\_id = S#688551  
 Solvent = CHLOROFORM-D  
 Creation\_time = 24-OCT-2015 18:39:13  
 Revision\_time = 24-OCT-2015 19:12:38  
 Current\_time = 24-OCT-2015 19:13:16

Comment = single pulse decouple  
 Data\_format = 1D COMPLEX  
 Dim\_size = 26214  
 Dim\_title = 13C  
 Dim\_units = [ppm]  
 Dimensions = X  
 Site = ECS 400  
 Spectrometer = JNM-ECS400

Field\_strength = 9.20197068[T] (390[MH  
 X\_acq\_duration = 1.06430464[s]  
 X\_domain = 13C  
 X\_freq = 98.51479726[MHz]  
 X\_offset = 100[ppm]  
 X\_points = 32768  
 X\_prescans = 4  
 X\_resolution = 0.93958061[Hz]  
 X\_sweep = 30.78817734[kHz]  
 Irr\_domain = 1H  
 Irr\_freq = 391.78655441[MHz]  
 Irr\_offset = 5[ppm]  
 Clipped = FALSE  
 Mod\_return = 1  
 Scans = 65  
 Total\_scans = 65

X\_90\_width = 8.8[us]  
 X\_acq\_time = 1.06430464[s]  
 X\_angle = 30[deg]  
 X\_atn = 4.9[db]  
 X\_pulse = 2.93333333[us]  
 Irr\_atn\_dec = 22.52628[db]  
 Irr\_atn\_noe = 22.52628[db]  
 Irr\_noise = WALTZ  
 Decoupling = TRUE  
 Initial\_wait = 1[s]  
 Noe = TRUE  
 Noe\_time = 2[s]  
 Recvr\_gain = 60  
 Relaxation\_delay = 2[s]  
 Repetition\_time = 3.06430464[s]  
 Temp\_get = 19.5[dc]

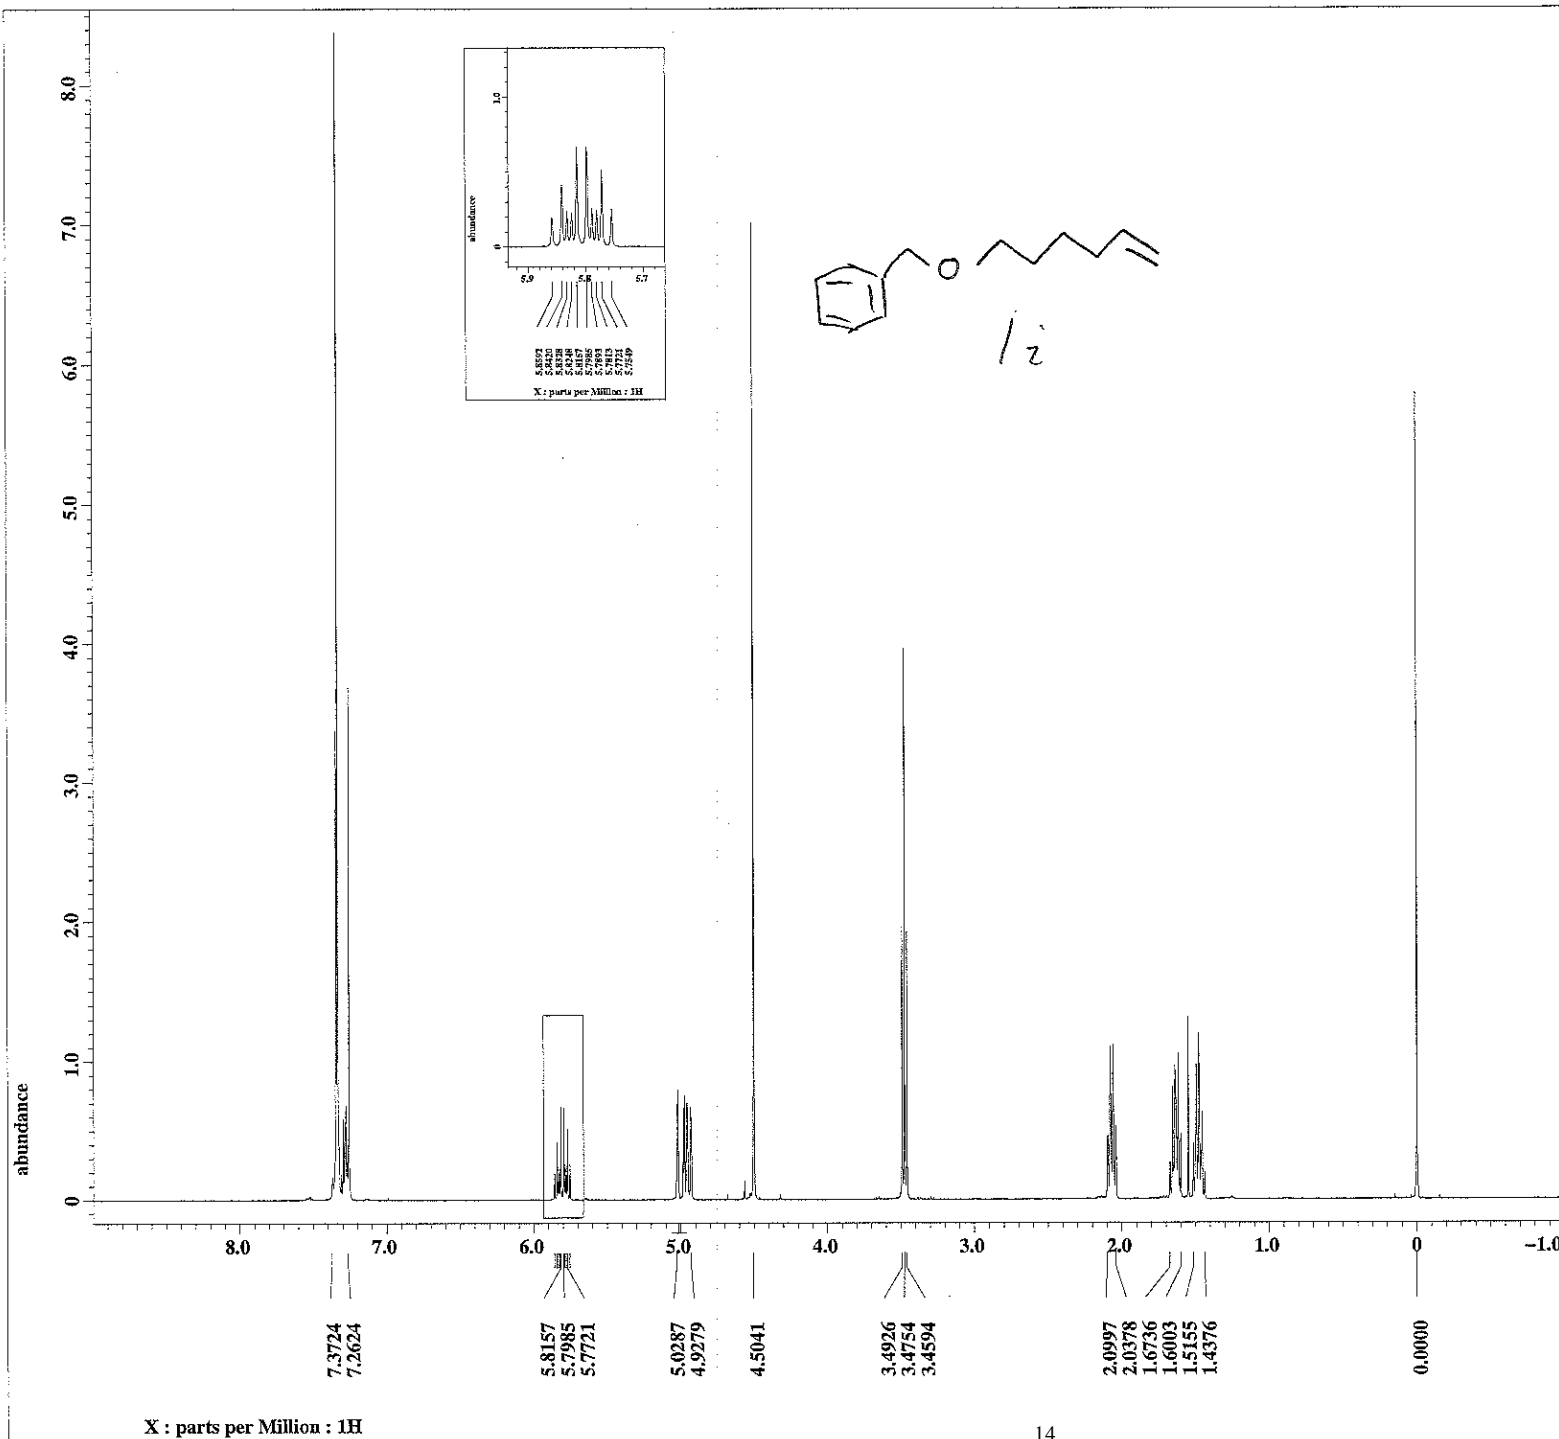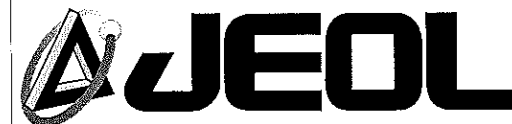

----- PROCESSING PARAMETERS -----  
 dc\_balance : 0 : FALSE  
 secp : 0.2[Hz] : 0.0[s]  
 trapezoid3 : 0[%] : 80[%] : 100[%]  
 zerofill : 1  
 fft : 1 : TRUE : TRUE  
 machinephase  
 ppm

Derived from: IWA-821-proton1-1.jdf

Filename = IWA-821-proton1-3.jdf  
 Author = element  
 Experiment = single\_pulse.ex2  
 Sample\_id = S#768593  
 Solvent = CHLOROFORM-D  
 Creation\_time = 6-DEC-2015 20:51:32  
 Revision\_time = 6-DEC-2015 21:26:40  
 Current\_time = 6-DEC-2015 21:26:43

Comment = single\_pulse  
 Data\_format = 1D COMPLEX  
 Dim\_size = 13107  
 Dim\_title = 1H  
 Dim\_units = [ppm]  
 Dimensions = X  
 Site = ECS 400  
 Spectrometer = JNM-ECS400

Field\_strength = 9.20197068[T] (390[MH]  
 X\_acq\_duration = 2.228224[s]  
 X\_domain = 1H  
 X\_freq = 391.78655441[MHz]  
 X\_offset = 5[ppm]  
 X\_points = 16384  
 X\_prescans = 1  
 X\_resolution = 0.44878791[Hz]  
 X\_sweep = 7.35294118[kHz]  
 Irr\_domain = 1H  
 Irr\_freq = 391.78655441[MHz]  
 Irr\_offset = 5[ppm]  
 Tri\_domain = 1H  
 Tri\_freq = 391.78655441[MHz]  
 Tri\_offset = 5[ppm]  
 Clipped = FALSE  
 Mod\_return = 1  
 Scans = 8  
 Total\_scans = 8

X\_90\_width = 10.7[us]  
 X\_acq\_time = 2.228224[s]  
 X\_angle = 45[deg]  
 X\_atn = 1.9[dB]  
 X\_pulse = 5.35[us]  
 Irr\_mode = Off  
 Tri\_mode = Off  
 Dante\_presat = FALSE  
 Initial\_wait = 1[s]  
 Recvr\_gain = 44  
 Relaxation\_delay = 5[s]  
 Repetition\_time = 7.228224[s]  
 Temp\_get = 20.9[dc]

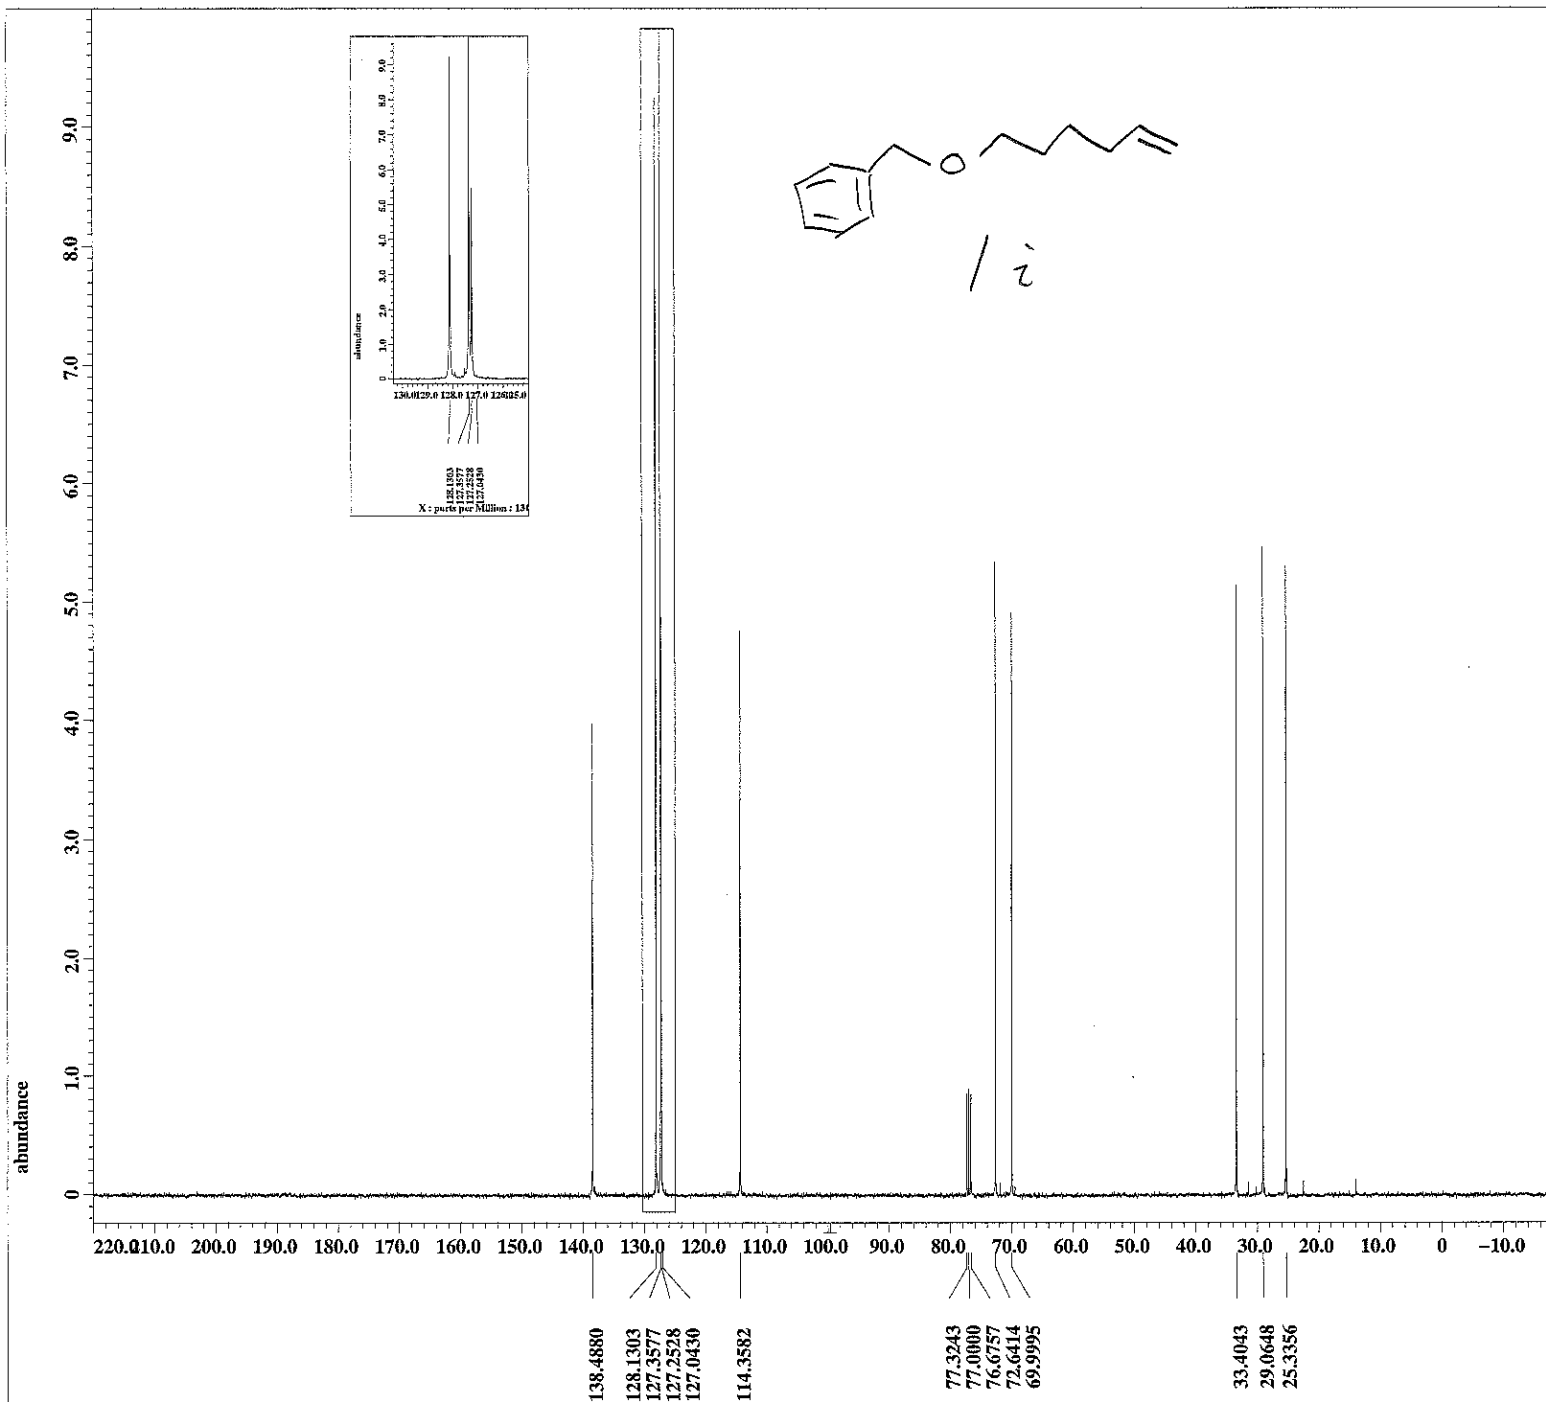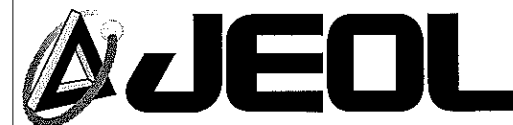

----- PROCESSING PARAMETERS -----

dc\_balance : 0 : FALSE  
 sexp : 2.0[Hz] : 0.0[s]  
 trapezoid3 : 0[%] : 80[%] : 100[%]  
 zerofill : 1  
 fft : 1 : TRUE : TRUE  
 machinephase  
 ppm  
 dc\_balance : 0 : FALSE  
 sexp : 0.2[Hz] : 0.0[s]  
 fft : 1 : TRUE : TRUE  
 machinephase  
 ppm

Filename = IWA-826-carbon-4.jdf  
 Author = element  
 Experiment = single\_pulse\_dec  
 Sample\_id = S#721615  
 Solvent = CHLOROFORM-D  
 Creation\_time = 25-OCT-2015 19:33:37  
 Revision\_time = 25-OCT-2015 20:07:30  
 Current\_time = 25-OCT-2015 20:08:30

Comment = single pulse decouple  
 Data\_format = 1D COMPLEX  
 Dim\_size = 26214  
 Dim\_title = 13C  
 Dim\_units = [ppm]  
 Dimensions = X  
 Site = ECS 400  
 Spectrometer = JNM-ECS400

Field\_strength = 9.20197068[T] (390[MH  
 X\_acq\_duration = 1.06430464[s]  
 X\_domain = 13C  
 X\_freq = 98.51479726[MHz]  
 X\_offset = 100[ppm]  
 X\_points = 32768  
 X\_prescans = 4  
 X\_resolution = 0.93958061[Hz]  
 X\_sweep = 30.78817734[kHz]  
 Irr\_domain = 1H  
 Irr\_freq = 391.78655441[MHz]  
 Irr\_offset = 5[ppm]  
 Clipped = FALSE  
 Mod\_return = 1  
 Scans = 52  
 Total\_scans = 52

X\_90\_width = 8.8[us]  
 X\_acq\_time = 1.06430464[s]  
 X\_angle = 30[deg]  
 X\_atn = 4.9[dB]  
 X\_pulse = 2.93333333[us]  
 Irr\_atn\_dec = 22.52628[dB]  
 Irr\_atn\_noe = 22.52628[dB]  
 Irr\_noise = WALTZ  
 Decoupling = TRUE  
 Initial\_wait = 1[s]  
 Noe = TRUE  
 Noe\_time = 2[s]  
 Recvr\_gain = 60  
 Relaxation\_delay = 2[s]  
 Repetition\_time = 3.06430464[s]  
 Temp\_get = 20.2[dC]

X : parts per Million : 13C

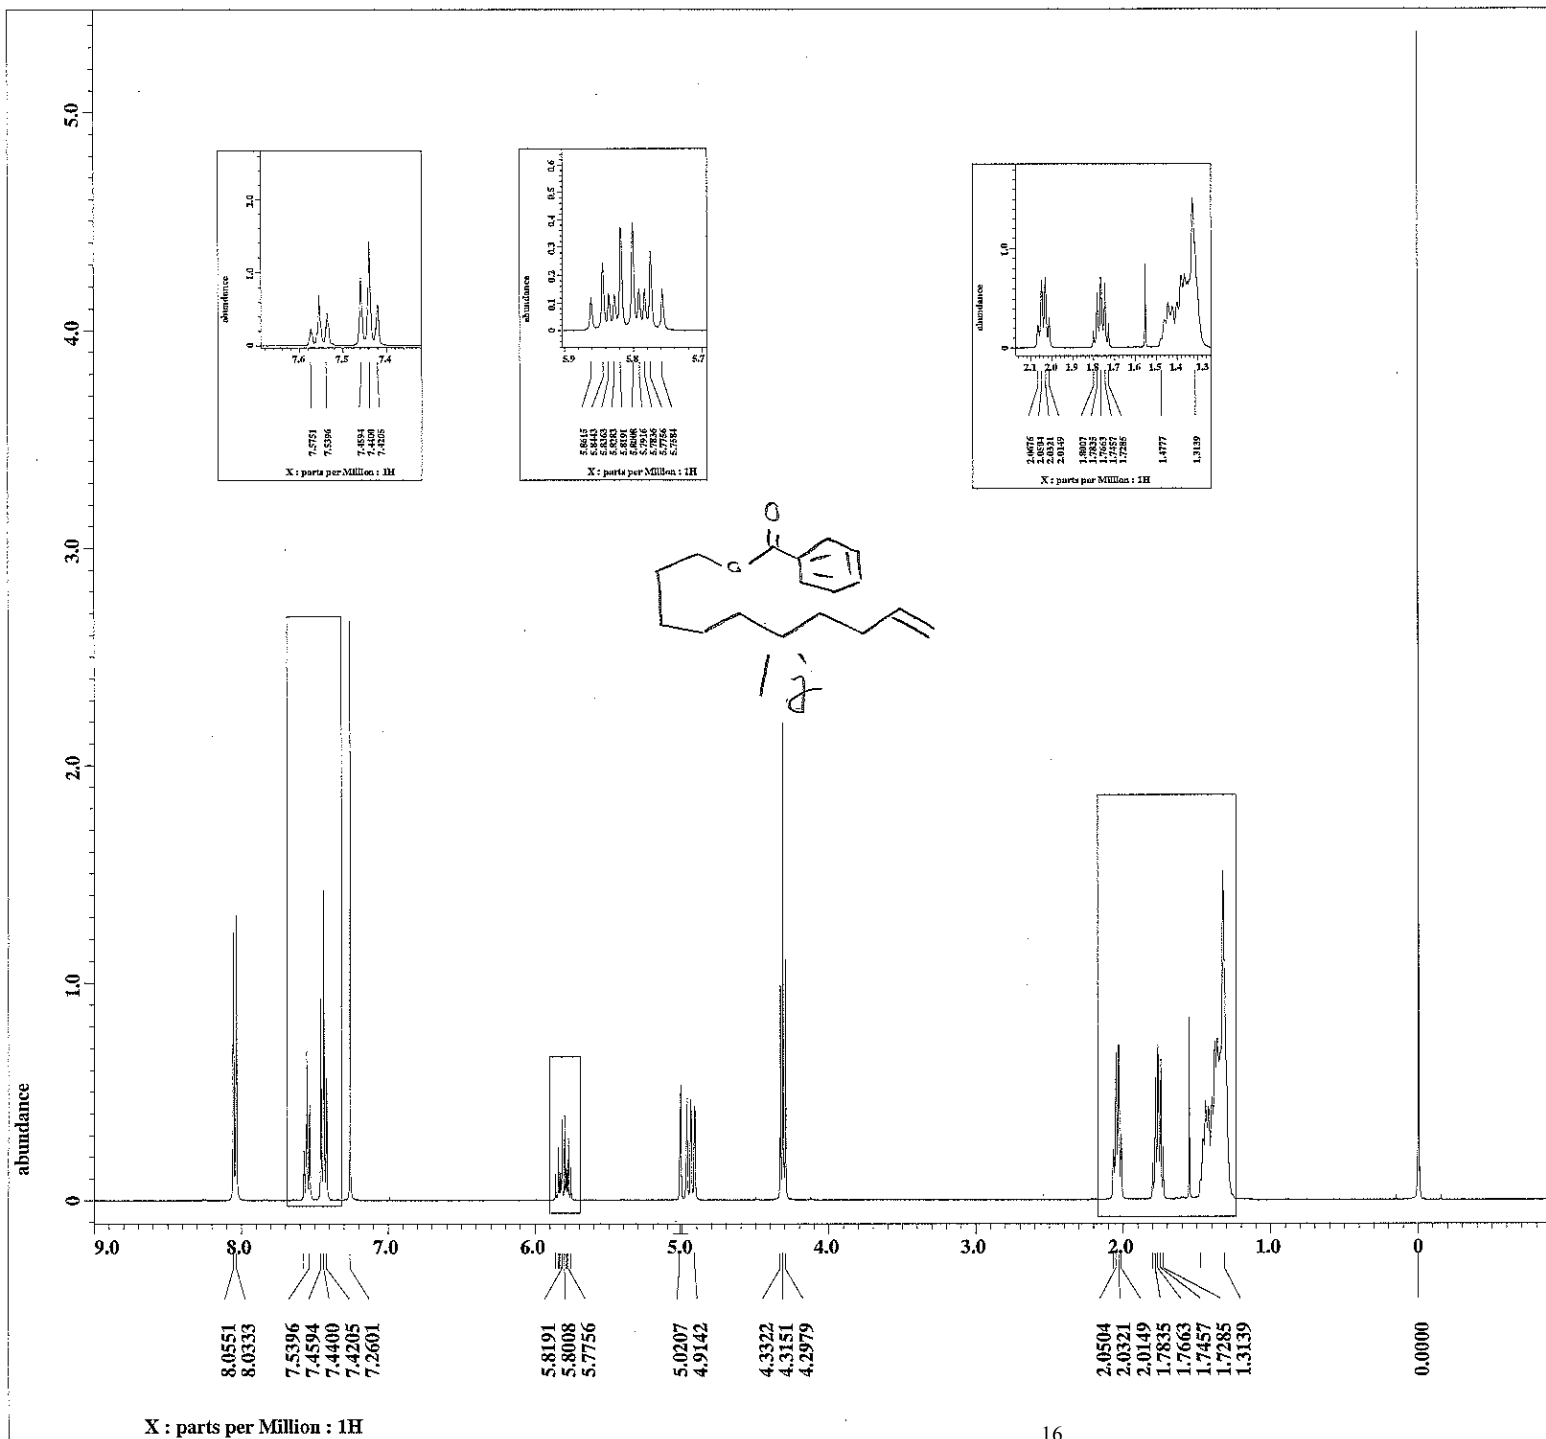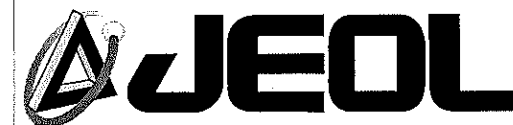

----- PROCESSING PARAMETERS -----  
 dc\_balance : 0 : FALSE  
 secp : 0.2[Hz] : 0.0[s]  
 trapezoid3 : 0[%] : 80[%] : 100[%]  
 zerofill : 1  
 fft : 1 : TRUE : TRUE  
 machinephase  
 ppm

Derived from: IWA-845-proton-1.jdf

Filename = IWA-845-proton-4.jdf  
 Author = element  
 Experiment = single\_pulse.ex2  
 Sample\_id = S#370976  
 Solvent = CHLOROFORM-D  
 Creation\_time = 5-DEC-2015 09:49:03  
 Revision\_time = 5-DEC-2015 10:28:10  
 Current\_time = 5-DEC-2015 10:28:12

Comment = single\_pulse  
 Data\_format = 1D\_COMPLEX  
 Dim\_size = 13107  
 Dim\_title = 1H  
 Dim\_units = [ppm]  
 Dimensions = X  
 Site = ECS 400  
 Spectrometer = JNM-ECS400

Field\_strength = 9.20197068[T] (390[MH  
 X\_acq\_duration = 2.228224[s]  
 X\_domain = 1H  
 X\_freq = 391.78655441[MHz]  
 X\_offset = 5[ppm]  
 X\_points = 16384  
 X\_prescans = 1  
 X\_resolution = 0.44878791[Hz]  
 X\_sweep = 7.35294118[kHz]  
 Irr\_domain = 1H  
 Irr\_freq = 391.78655441[MHz]  
 Irr\_offset = 5[ppm]  
 Tri\_domain = 1H  
 Tri\_freq = 391.78655441[MHz]  
 Tri\_offset = 5[ppm]  
 Clipped = FALSE  
 Mod\_return = 1  
 Scans = 8  
 Total\_scans = 8

X\_90\_width = 10.7[us]  
 X\_acq\_time = 2.228224[s]  
 X\_angle = 45[deg]  
 X\_atn = 1.9[dB]  
 X\_pulse = 5.35[us]  
 Irr\_mode = Off  
 Tri\_mode = Off  
 Dante\_presat = FALSE  
 Initial\_wait = 1[s]  
 Recvr\_gain = 44  
 Relaxation\_delay = 5[s]  
 Repetition\_time = 7.228224[s]  
 Temp\_get = 21.4[dc]



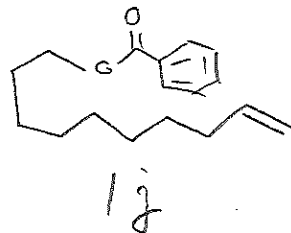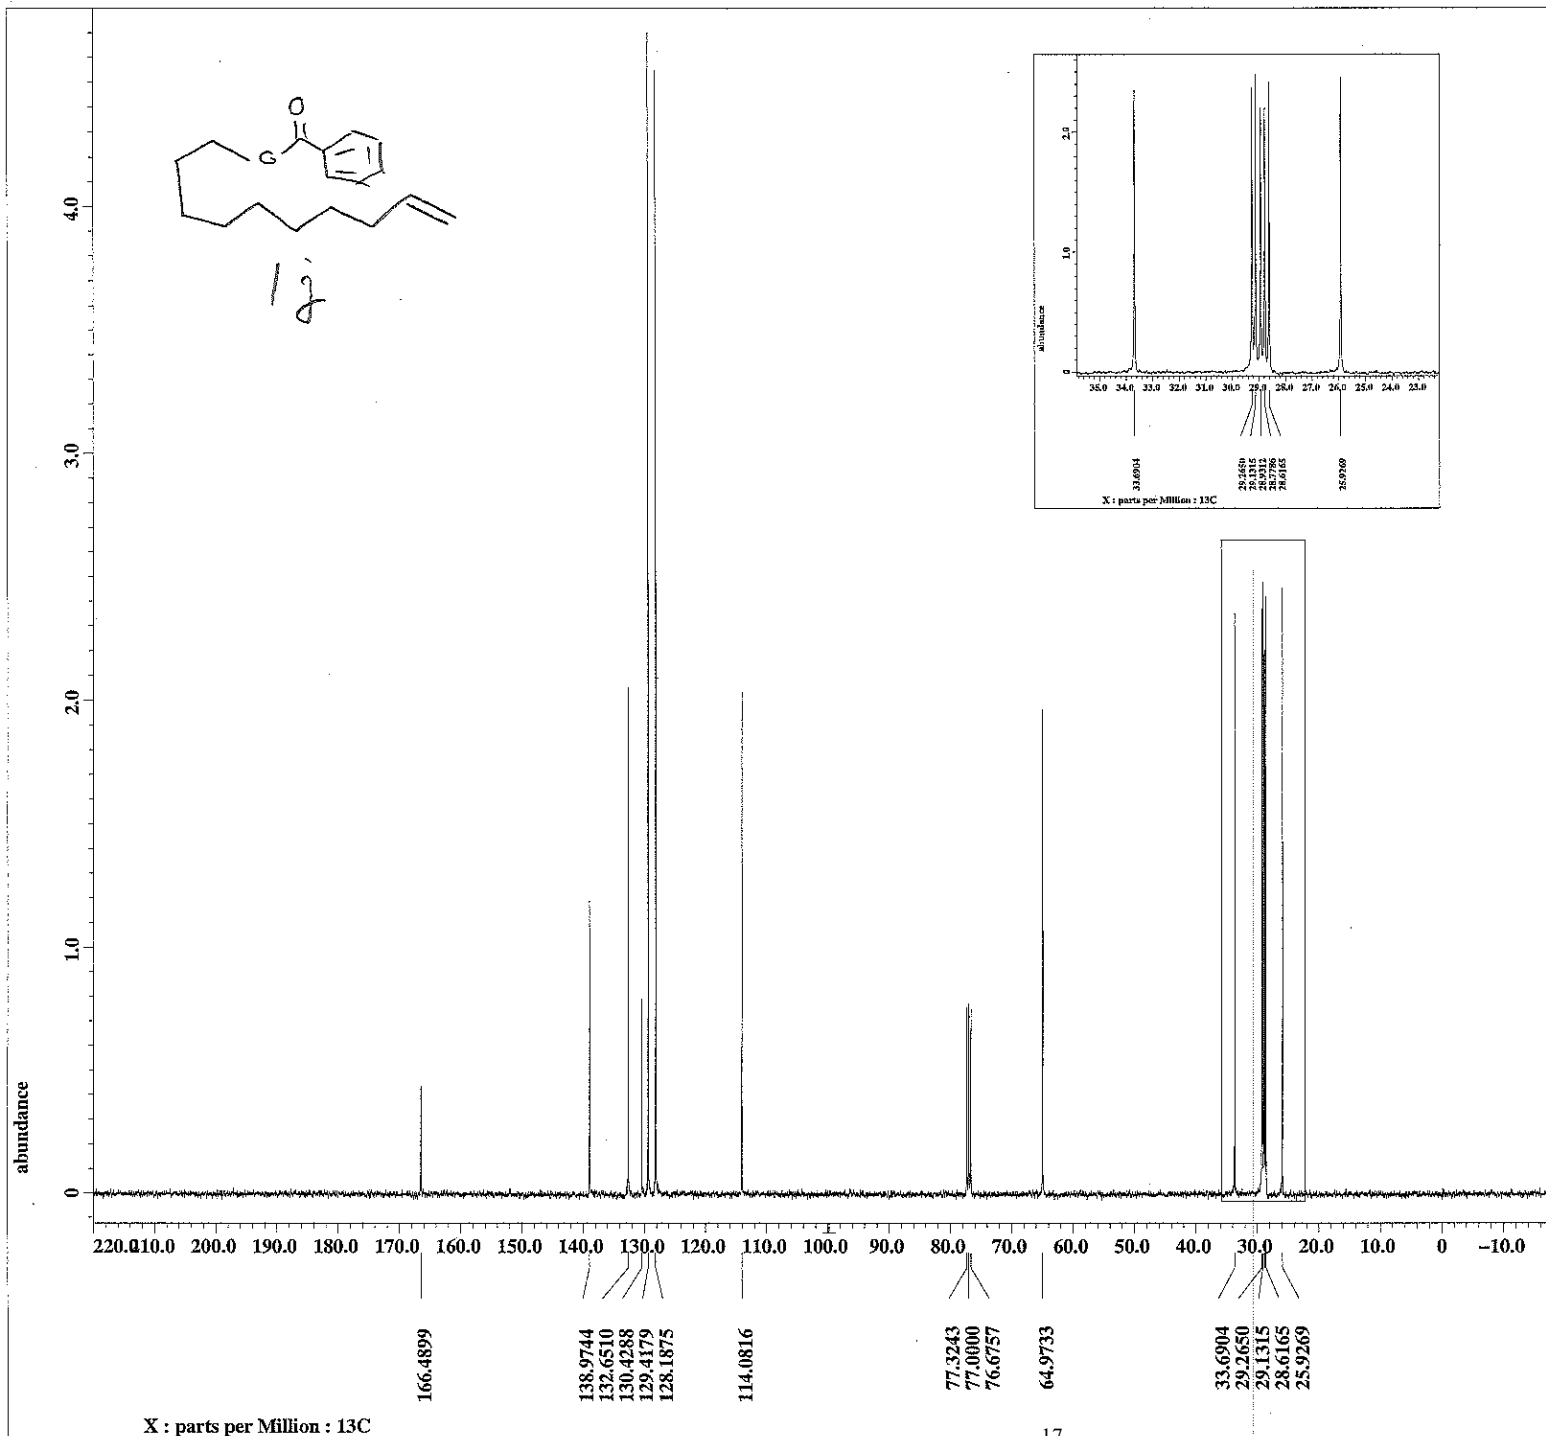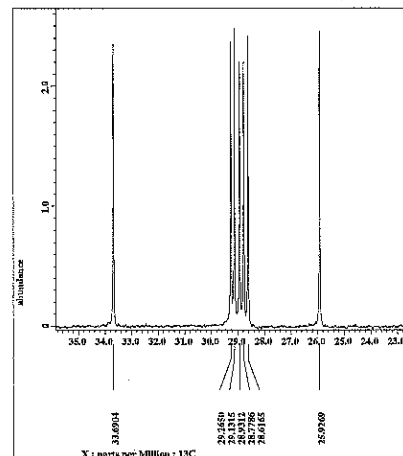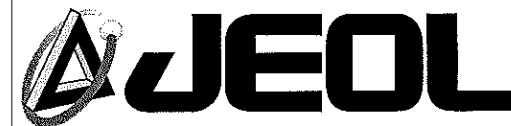

----- PROCESSING PARAMETERS -----  
 dc\_balance : 0 : FALSE  
 secp : 2.0[Hz] : 0.0[s]  
 trapezoid3 : 0[%] : 80[%] : 100[%]  
 zerofill : 1  
 fft : 1 : TRUE : TRUE  
 machinephase  
 ppm

Derived from: IWA-845-carbon-2.jdf

Filename = IWA-845-carbon-4.jdf  
 Author = element  
 Experiment = single\_pulse\_dec  
 Sample\_id = S#374971  
 Solvent = CHLOROFORM-D  
 Creation\_time = 5-DEC-2015 09:59:27  
 Revision\_time = 5-DEC-2015 10:31:09  
 Current\_time = 5-DEC-2015 10:32:15

Comment = single pulse decouple  
 Data\_format = 1D COMPLEX  
 Dim\_size = 26214  
 Dim\_title = 13C  
 Dim\_units = [ppm]  
 Dimensions = X  
 Site = ECS 400  
 Spectrometer = JNM-ECS400

Field\_strength = 9.20197068[T] (390[MH]  
 X\_acq\_duration = 1.06430464[s]  
 X\_domain = 13C  
 X\_freq = 98.51479726[MHz]  
 X\_offset = 100[ppm]  
 X\_points = 32768  
 X\_prescans = 4  
 X\_resolution = 0.93958061[Hz]  
 X\_sweep = 30.78817734[kHz]  
 Irr\_domain = 1H  
 Irr\_freq = 391.78655441[MHz]  
 Irr\_offset = 5[ppm]  
 Clipped = FALSE  
 Mod\_return = 1  
 Scans = 95  
 Total\_scans = 95

X\_90\_width = 8.8[us]  
 X\_acq\_time = 1.06430464[s]  
 X\_angle = 30[deg]  
 X\_atn = 4.9[db]  
 X\_pulse = 2.93333333[us]  
 Irr\_atn\_dec = 22.52628[db]  
 Irr\_atn\_noe = 22.52628[db]  
 Irr\_noise = WALTZ  
 Decoupling = TRUE  
 Initial\_wait = 1[s]  
 Noe = TRUE  
 Noe\_time = 2[s]  
 Recvr\_gain = 60  
 Relaxation\_delay = 2[s]  
 Repetition\_time = 3.06430464[s]  
 Temp\_get = 21.6[dc]

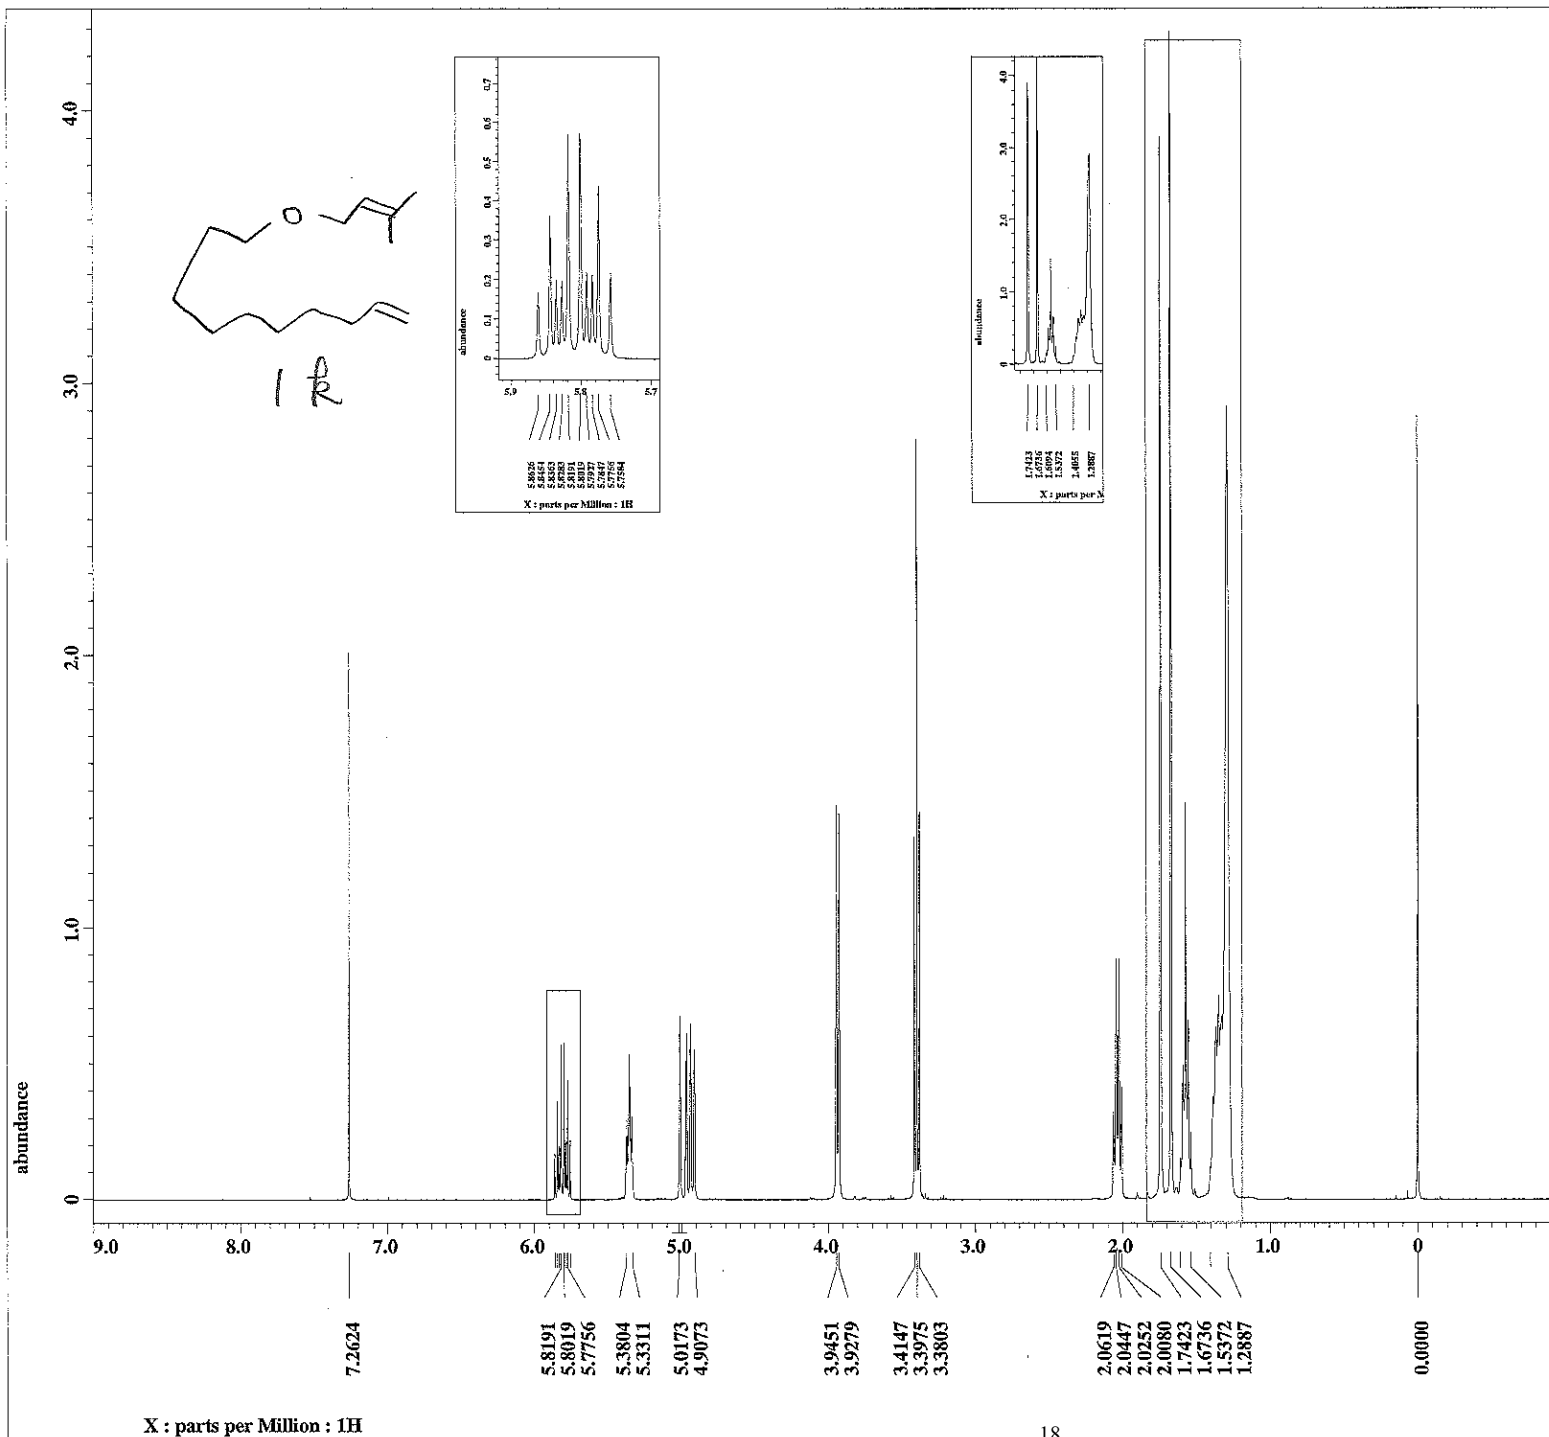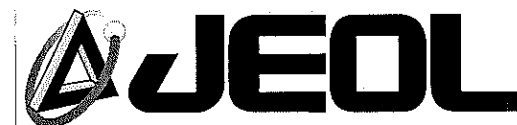

----- PROCESSING PARAMETERS -----  
 dc\_balance : 0 : FALSE  
 secp : 0.2[Hz] : 0.0[s]  
 trapezoid3 : 0[%] : 80[%] : 100[%]  
 zerofill : 1  
 fft : 1 : TRUE : TRUE  
 machinephase  
 ppm

Derived from: IWA-844-proton-1.jdf

Filename = IWA-844-proton-4.jdf  
 Author = element  
 Experiment = single\_pulse.ex2  
 Sample\_id = S#705234  
 Solvent = CHLOROFORM-D  
 Creation\_time = 30-NOV-2015 19:07:02  
 Revision\_time = 30-NOV-2015 19:45:48  
 Current\_time = 30-NOV-2015 19:45:50

Comment = single\_pulse  
 Data\_format = 1D\_COMPLEX  
 Dim\_size = 13107  
 Dim\_title = 1H  
 Dim\_units = [ppm]  
 Dimensions = X  
 Site = ECS 400  
 Spectrometer = JNM-ECS400

Field\_strength = 9.20197068[T] (390[MH]  
 X\_acq\_duration = 2.228224[s]  
 X\_domain = 1H  
 X\_freq = 391.78655441[MHz]  
 X\_offset = 5[ppm]  
 X\_points = 16384  
 X\_prescans = 1  
 X\_resolution = 0.44878791[Hz]  
 X\_sweep = 7.35294118[kHz]  
 Irr\_domain = 1H  
 Irr\_freq = 391.78655441[MHz]  
 Irr\_offset = 5[ppm]  
 Tri\_domain = 1H  
 Tri\_freq = 391.78655441[MHz]  
 Tri\_offset = 5[ppm]  
 Clipped = FALSE  
 Mod\_return = 1  
 Scans = 8  
 Total\_scans = 8

X\_90\_width = 10.7[us]  
 X\_acq\_time = 2.228224[s]  
 X\_angle = 45[deg]  
 X\_atn = 1.9[db]  
 X\_pulse = 5.35[us]  
 Irr\_mode = Off  
 Tri\_mode = Off  
 Dante\_presat = FALSE  
 Initial\_wait = 1[s]  
 Recvr\_gain = 38  
 Relaxation\_delay = 5[s]  
 Repetition\_time = 7.228224[s]  
 Temp\_get = 20.8[dc]

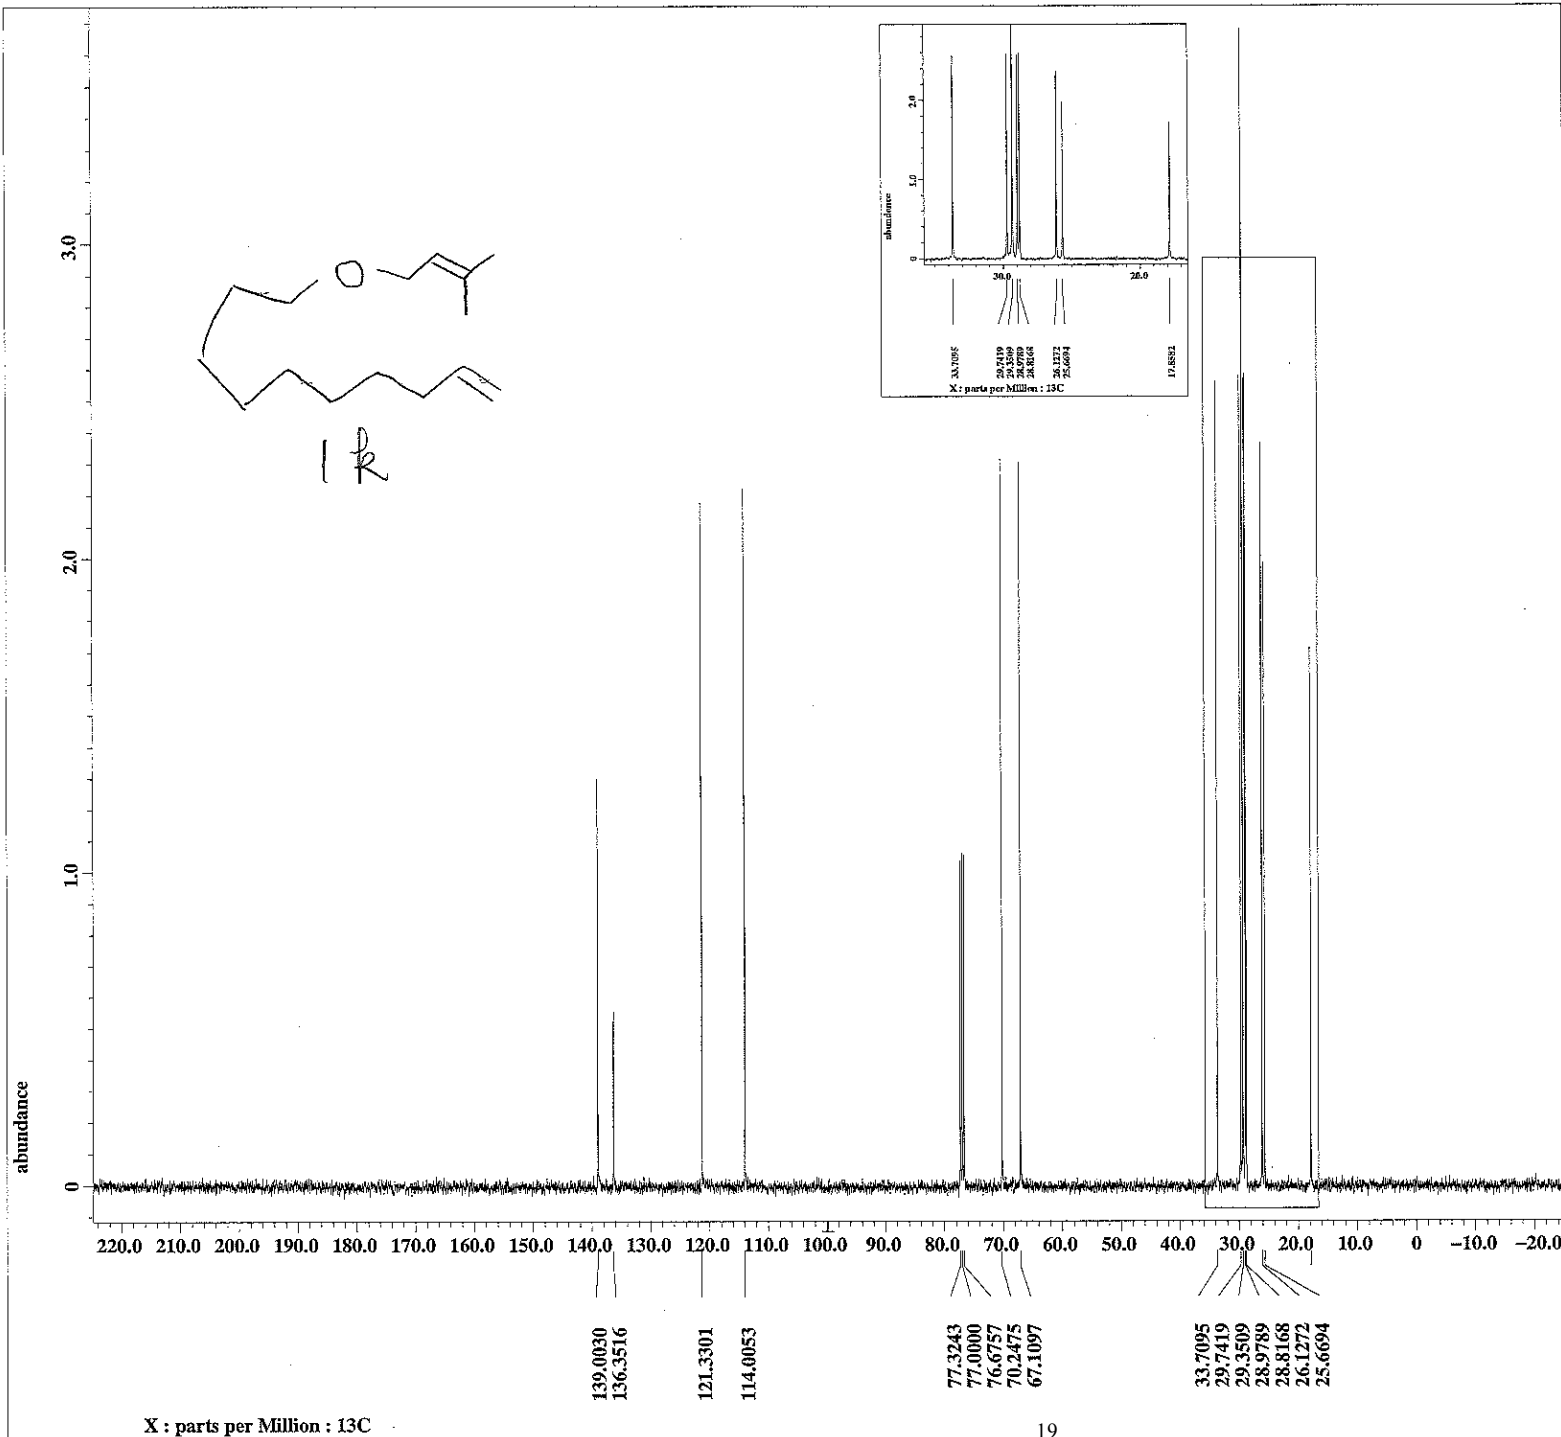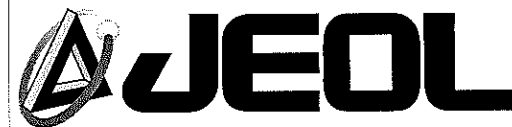

----- PROCESSING PARAMETERS -----  
 dc\_balance : 0 : FALSE  
 sexp : 2.0[Hz] : 0.0[s]  
 trapezoid3 : 0[%] : 80[%] : 100[%]  
 zerofill : 1  
 fft : 1 : TRUE : TRUE  
 machinephase  
 ppm

Derived from: IWA-844-carbon-1.jdf

Filename = IWA-844-carbon-3.jdf  
 Author = element  
 Experiment = single\_pulse\_dec  
 Sample\_id = S#709003  
 Solvent = CHLOROFORM-D  
 Creation\_time = 30-NOV-2015 19:14:34  
 Revision\_time = 30-NOV-2015 19:46:36  
 Current\_time = 30-NOV-2015 19:49:26

Comment = single pulse decouple  
 Data\_format = 1D COMPLEX  
 Dim\_size = 26214  
 Dim\_title = 13C  
 Dim\_units = [ppm]  
 Dimensions = X  
 Site = ECS 400  
 Spectrometer = JNM-ECS400

Field\_strength = 9.20197068[T] (390[MH]  
 X\_acq\_duration = 1.06430464[s]  
 X\_domain = 13C  
 X\_freq = 98.51479726[MHz]  
 X\_offset = 100[ppm]  
 X\_points = 32768  
 X\_prescans = 4  
 X\_resolution = 0.93958061[Hz]  
 X\_sweep = 30.78817734[kHz]  
 Irr\_domain = 1H  
 Irr\_freq = 391.78655441[MHz]  
 Irr\_offset = 5[ppm]  
 Clipped = FALSE  
 Mod\_return = 1  
 Scans = 51  
 Total\_scans = 51

X\_90\_width = 8.8[us]  
 X\_acq\_time = 1.06430464[s]  
 X\_angle = 30[deg]  
 X\_atn = 4.9[db]  
 X\_pulse = 2.93333333[us]  
 Irr\_atn\_dec = 22.52628[db]  
 Irr\_atn\_noe = 22.52628[db]  
 Irr\_noise = WALTZ  
 Decoupling = TRUE  
 Initial\_wait = 1[s]  
 Noe = TRUE  
 Noe\_time = 2[s]  
 Recvr\_gain = 60  
 Relaxation\_delay = 2[s]  
 Repetition\_time = 3.06430464[s]  
 Temp\_get = 21[dc]

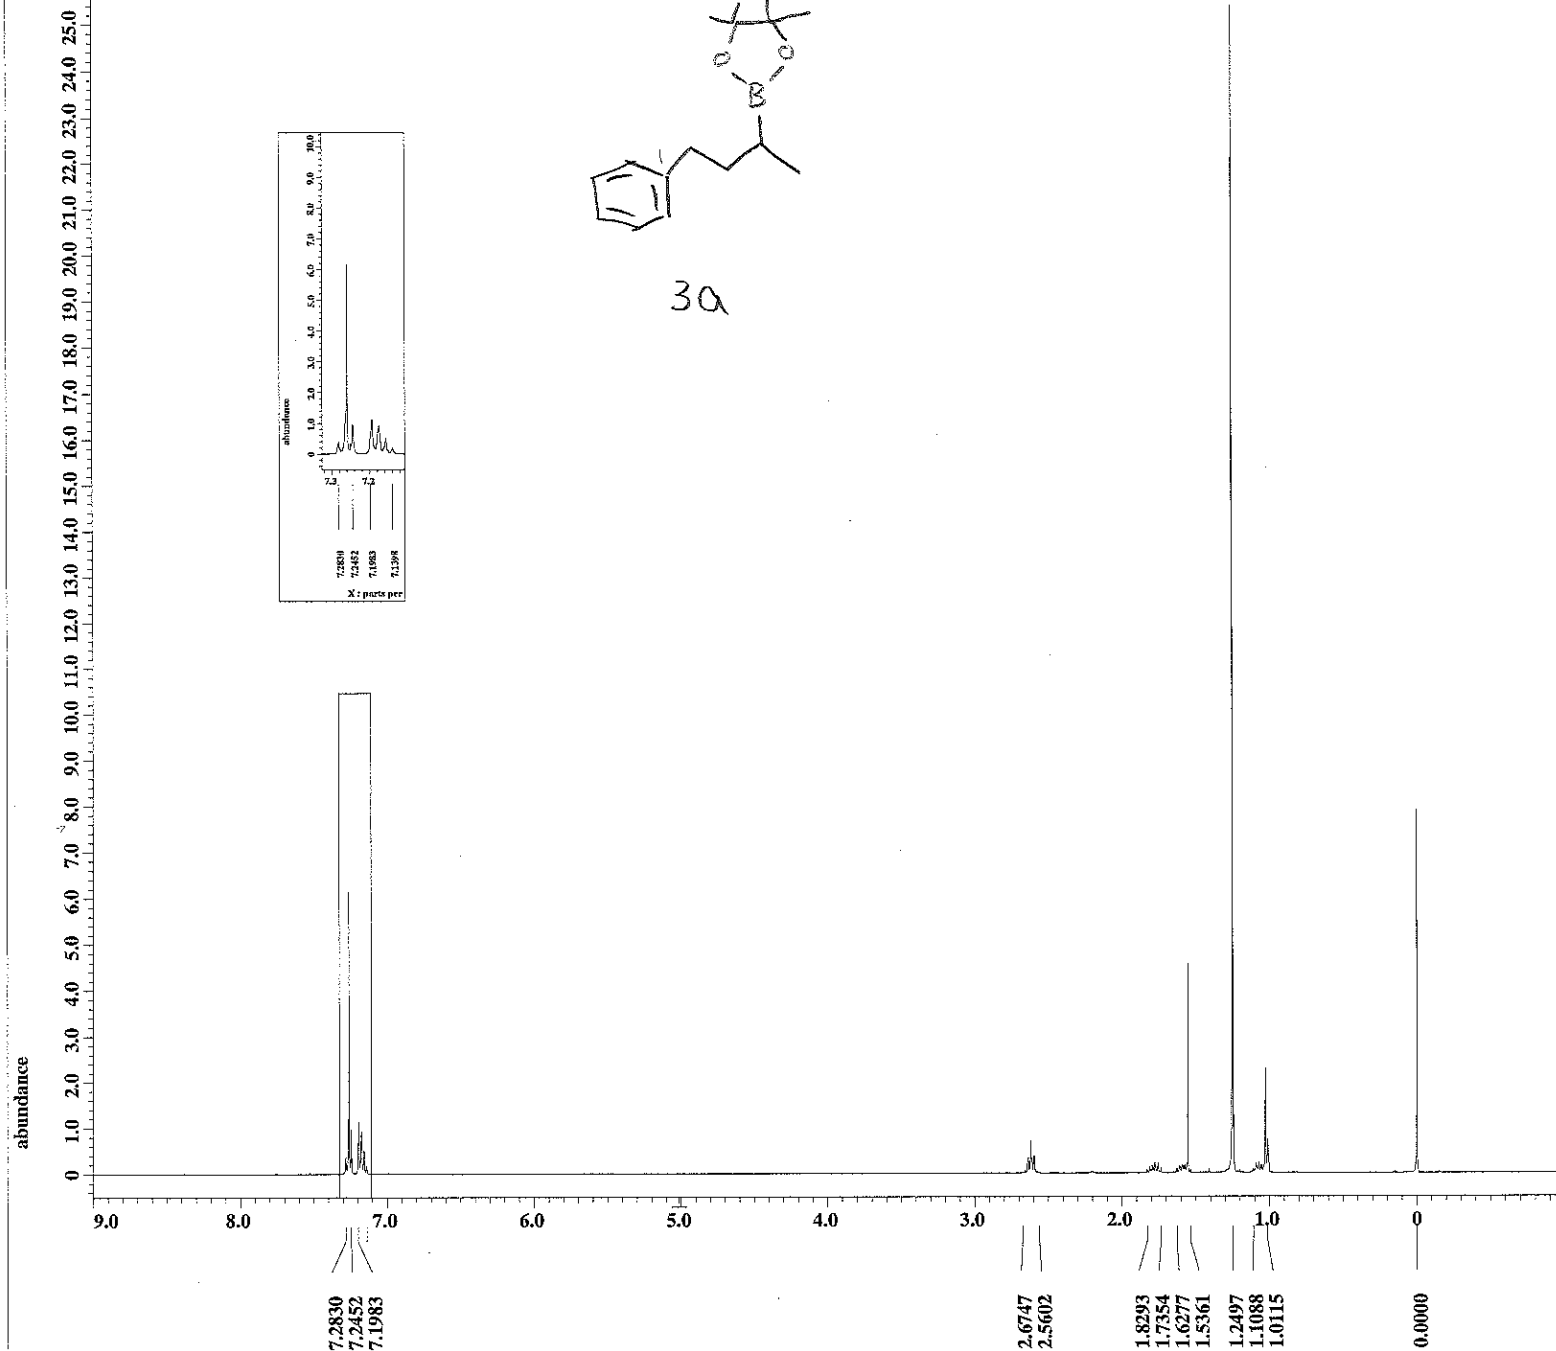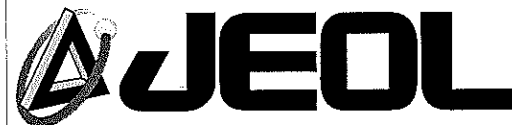

----- PROCESSING PARAMETERS -----  
 dc\_balance : 0 : FALSE  
 secp : 0.2[Hz] : 0.0[s]  
 trapezoid3 : 0[%] : 80[%] : 100[%]  
 zerofill : 1  
 fft : 1 : TRUE : TRUE  
 machinephase  
 ppm

Derived from: IWA-776-pure1-1.jdf

Filename = IWA-776-pure1-3.jdf  
 Author = element  
 Experiment = single\_pulse.ex2  
 Sample\_id = S#649528  
 Solvent = CHLOROFORM-D  
 Creation\_time = 3-NOV-2015 17:30:36  
 Revision\_time = 3-NOV-2015 18:10:29  
 Current\_time = 3-NOV-2015 18:10:31

Comment = single\_pulse  
 Data\_format = 1D COMPLEX  
 Dim\_size = 13107  
 Dim\_title = 1H  
 Dim\_units = [ppm]  
 Dimensions = X  
 Site = ECS 400  
 Spectrometer = JNM-ECS400

Field\_strength = 9.20197068[T] (390[MH  
 X\_acq\_duration = 2.228224[s]  
 X\_domain = 1H  
 X\_freq = 391.78655441[MHz]  
 X\_offset = 5[ppm]  
 X\_points = 16384  
 X\_prescans = 1  
 X\_resolution = 0.44878791[Hz]  
 X\_sweep = 7.35294118[kHz]  
 Irr\_domain = 1H  
 Irr\_freq = 391.78655441[MHz]  
 Irr\_offset = 5[ppm]  
 Tri\_domain = 1H  
 Tri\_freq = 391.78655441[MHz]  
 Tri\_offset = 5[ppm]  
 Clipped = FALSE  
 Mod\_return = 1  
 Scans = 8  
 Total\_scans = 8

X\_90\_width = 10.7[us]  
 X\_acq\_time = 2.228224[s]  
 X\_angle = 45[deg]  
 X\_atn = 1.9[db]  
 X\_pulse = 5.35[us]  
 Irr\_mode = Off  
 Tri\_mode = Off  
 Dante\_presat = FALSE  
 Initial\_wait = 1[s]  
 Recvr\_gain = 46  
 Relaxation\_delay = 5[s]  
 Repetition\_time = 7.228224[s]  
 Temp\_get = 20.2[dc]

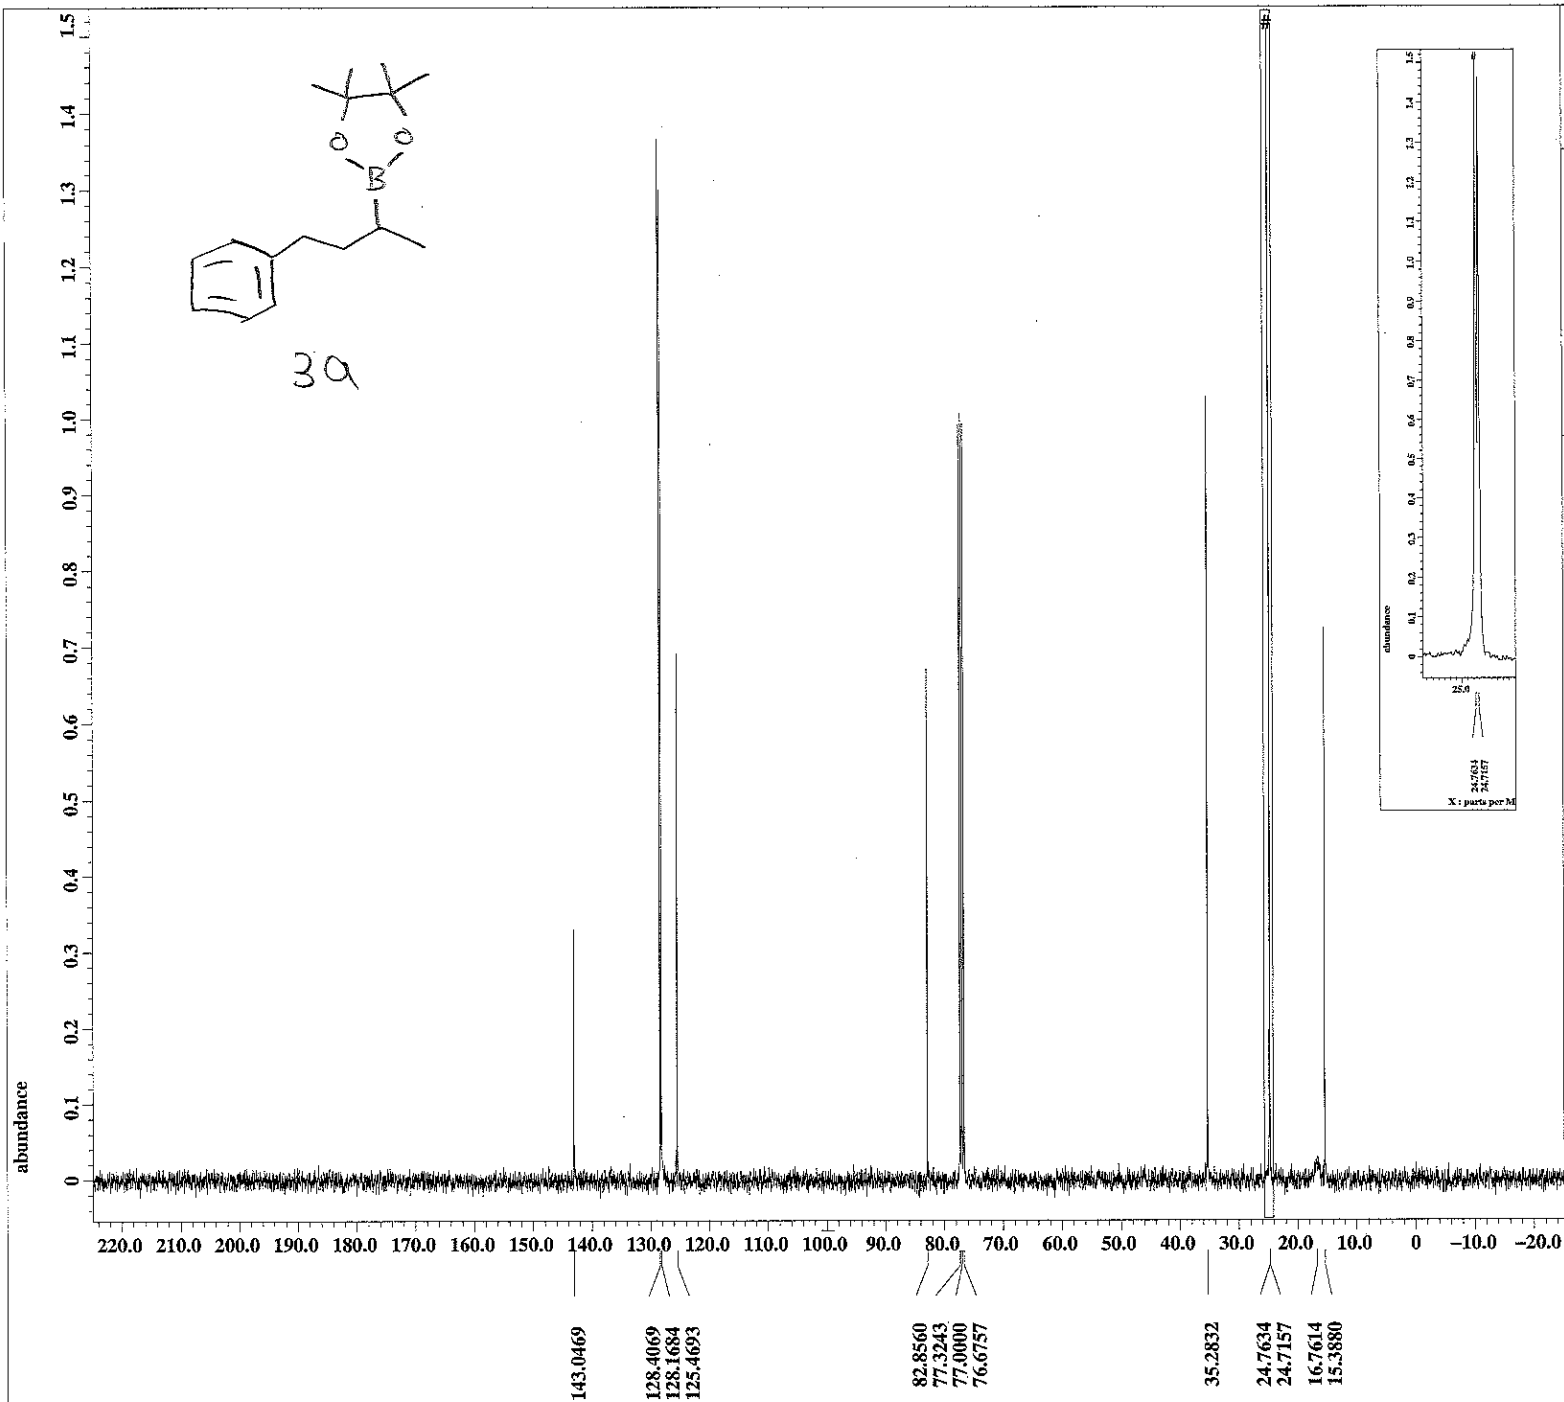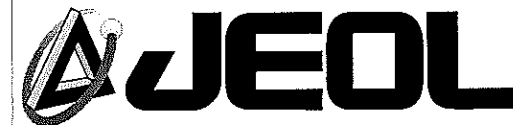

----- PROCESSING PARAMETERS -----  
 dc\_balance : 0 : FALSE  
 secp : 2.0[Hz] : 0.0[s]  
 trapezoid3 : 0[%] : 80[%] : 100[%]  
 zerofill : 1  
 fft : 1 : TRUE : TRUE  
 machinephase  
 ppm

Derived from: IWA-776-carbon-1.jdf

Filename = IWA-776-carbon-4.jdf  
 Author = element  
 Experiment = single\_pulse\_dec  
 Sample\_id = S#653309  
 Solvent = CHLOROFORM-D  
 Creation\_time = 3-NOV-2015 17:41:24  
 Revision\_time = 3-NOV-2015 18:16:31  
 Current\_time = 3-NOV-2015 18:17:53

Comment = single pulse decouple  
 Data\_format = 1D COMPLEX  
 Dim\_size = 26214  
 Dim\_title = 13C  
 Dim\_units = [ppm]  
 Dimensions = X  
 Site = ECS 400  
 Spectrometer = JNM-ECS400

Field\_strength = 9.20197068[T] (390[MH  
 X\_acq\_duration = 1.06430464[s]  
 X\_domain = 13C  
 X\_freq = 98.51479726[MHz]  
 X\_offset = 100[ppm]  
 X\_points = 32768  
 X\_prescans = 4  
 X\_resolution = 0.93958061[Hz]  
 X\_sweep = 30.78817734[kHz]  
 Irr\_domain = 1H  
 Irr\_freq = 391.78655441[MHz]  
 Irr\_offset = 5[ppm]  
 Clipped = FALSE  
 Mod\_return = 1  
 Scans = 110  
 Total\_scans = 110

X\_90\_width = 8.8[us]  
 X\_acq\_time = 1.06430464[s]  
 X\_angle = 30[deg]  
 X\_atn = 4.9[db]  
 X\_pulse = 2.93333333[us]  
 Irr\_atn\_dec = 22.52628[db]  
 Irr\_atn\_noe = 22.52628[db]  
 Irr\_noise = WALTZ  
 Decoupling = TRUE  
 Initial\_wait = 1[s]  
 Noe = TRUE  
 Noe\_time = 2[s]  
 Recvr\_gain = 60  
 Relaxation\_delay = 2[s]  
 Repetition\_time = 3.06430464[s]  
 Temp\_get = 20.6[dc]

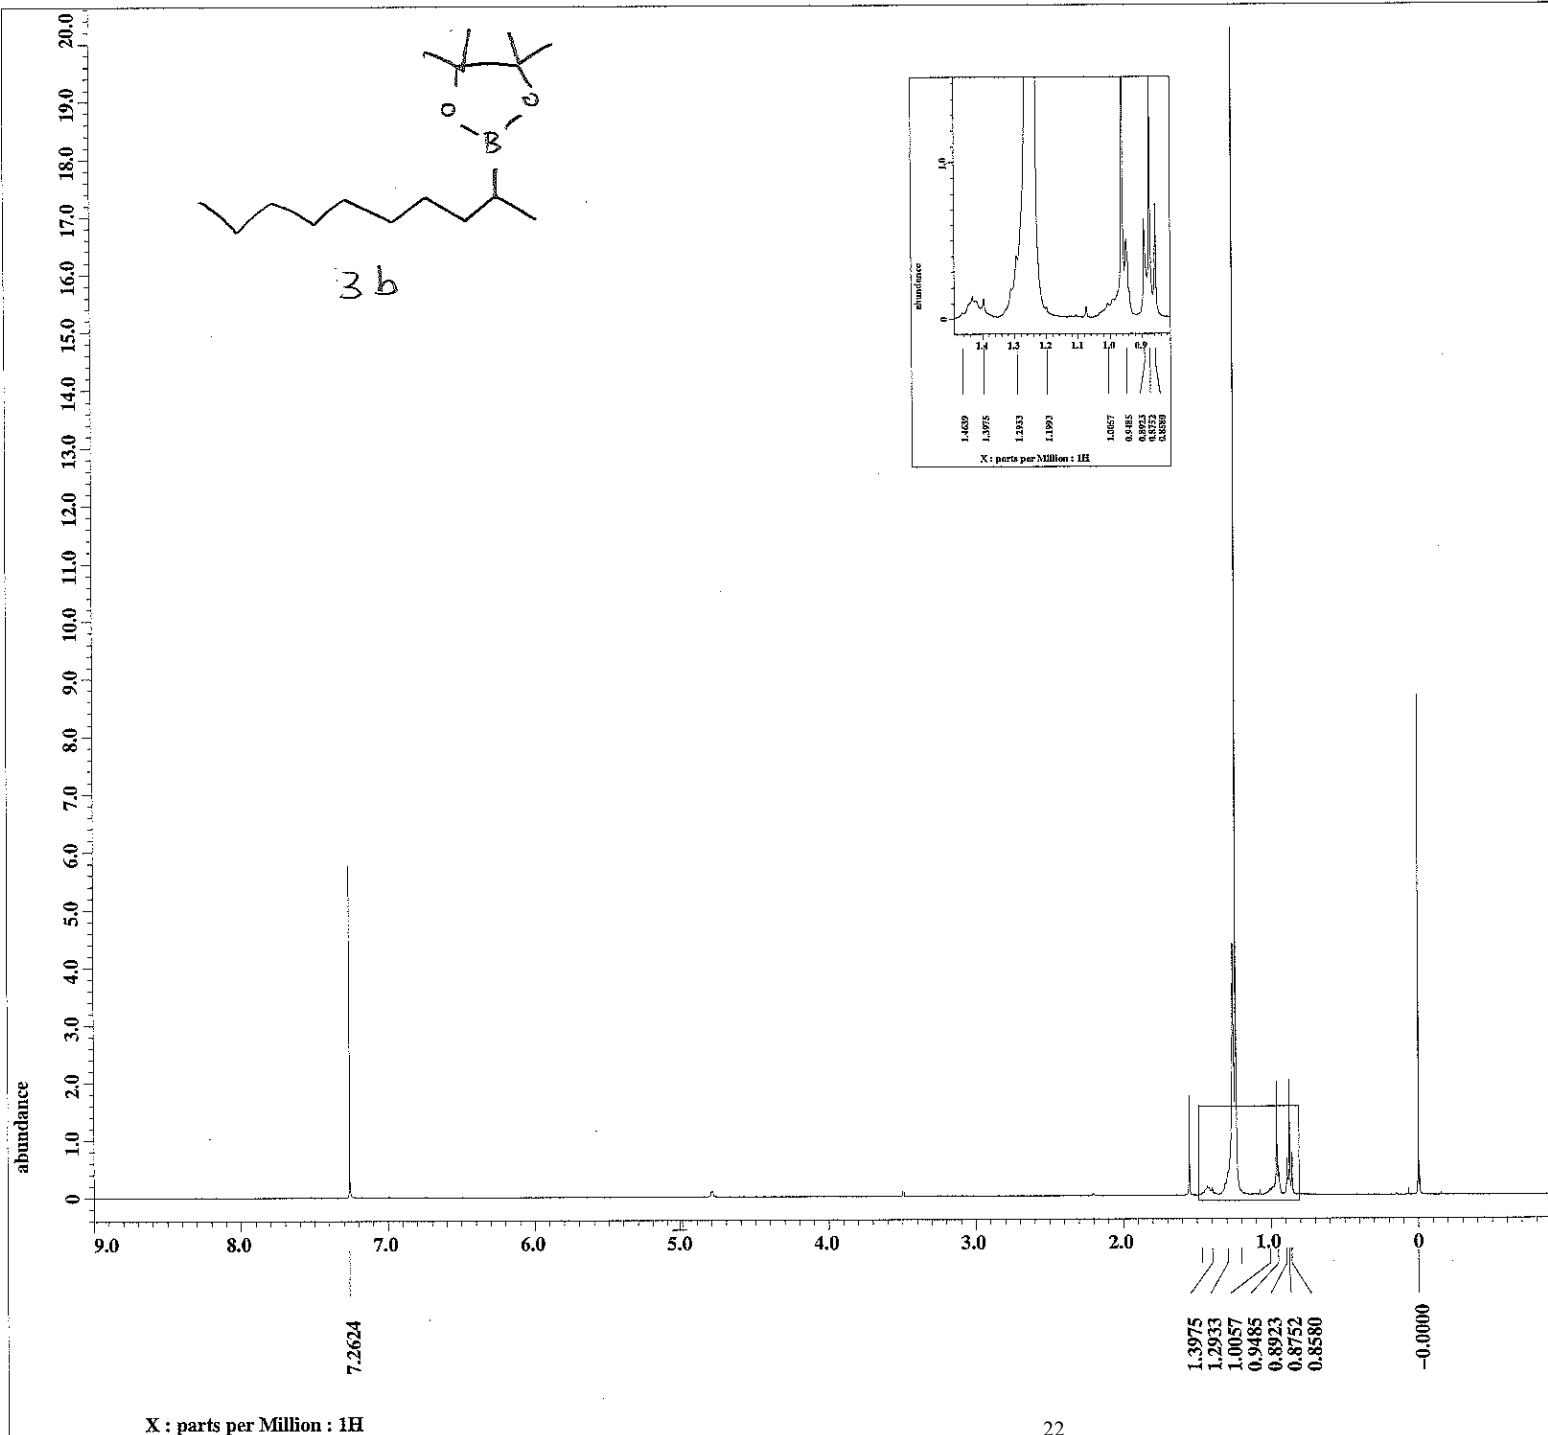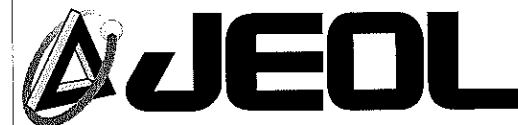

----- PROCESSING PARAMETERS -----  
 dc\_balance : 0 : FALSE  
 secp : 0.2[Hz] : 0.0[s]  
 trapezoid3 : 0[%] : 80[%] : 100[%]  
 zerofill : 1  
 fft : 1 : TRUE : TRUE  
 machinephase  
 ppm

Derived from: IWA-845-pure1-1.jdf

Filename = IWA-845-pure1-3.jdf  
 Author = element  
 Experiment = single\_pulse.ex2  
 Sample\_id = S#740265  
 Solvent = CHLOROFORM-D  
 Creation\_time = 26-NOV-2015 19:59:26  
 Revision\_time = 26-NOV-2015 20:43:39  
 Current\_time = 26-NOV-2015 20:43:42

Comment = single\_pulse  
 Data\_format = 1D COMPLEX  
 Dim\_size = 13107  
 Dim\_title = 1H  
 Dim\_units = [ppm]  
 Dimensions = X  
 Site = ECS 400  
 Spectrometer = JNM-ECS400

Field\_strength = 9.20197068[T] (390[MH]  
 X\_acq\_duration = 2.228224[s]  
 X\_domain = 1H  
 X\_freq = 391.78655441[MHz]  
 X\_offset = 5[ppm]  
 X\_points = 16384  
 X\_prescans = 1  
 X\_resolution = 0.44878791[Hz]  
 X\_sweep = 7.35294118[kHz]  
 Irr\_domain = 1H  
 Irr\_freq = 391.78655441[MHz]  
 Irr\_offset = 5[ppm]  
 Tri\_domain = 1H  
 Tri\_freq = 391.78655441[MHz]  
 Tri\_offset = 5[ppm]  
 Clipped = FALSE  
 Mod\_return = 1  
 Scans = 8  
 Total\_scans = 8

X\_90\_width = 10.7[us]  
 X\_acq\_time = 2.228224[s]  
 X\_angle = 45[deg]  
 X\_atn = 1.9[dB]  
 X\_pulse = 5.35[us]  
 Irr\_mode = Off  
 Tri\_mode = Off  
 Dante\_presat = FALSE  
 Initial\_wait = 1[s]  
 Recvr\_gain = 46  
 Relaxation\_delay = 5[s]  
 Repetition\_time = 7.228224[s]  
 Temp\_get = 20.9[dc]

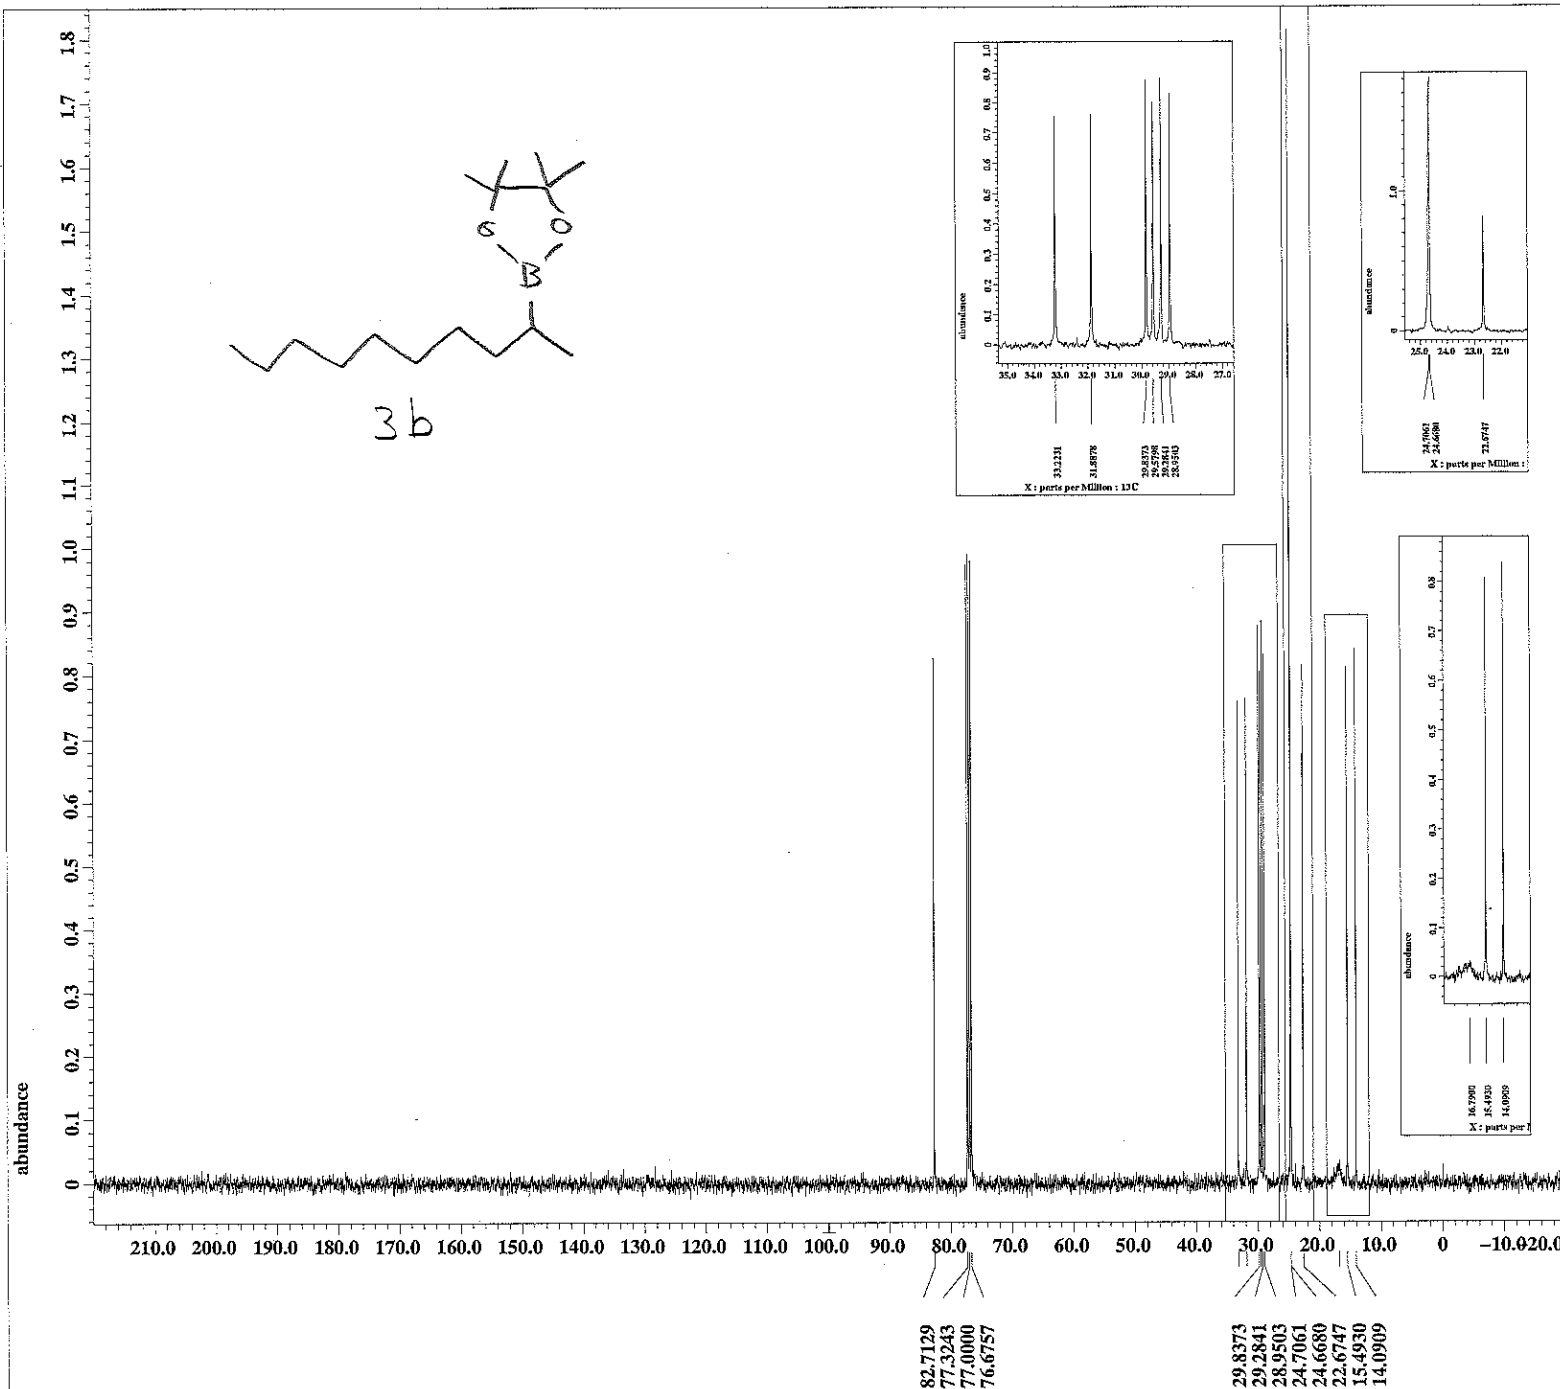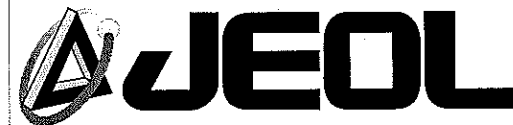

----- PROCESSING PARAMETERS -----

dc\_balance : 0 : FALSE  
sext : 2.0[Hz] : 0.0[s]  
trapezoid3 : 0[%] : 80[%] : 100[%]  
zerofill : 1  
fft : 1 : TRUE : TRUE  
machinephase  
ppm

Derived from: IWA-845-carbon-1.jdf

Filename = IWA-845-carbon-3.jdf  
Author = element  
Experiment = single\_pulse\_dec  
Sample\_id = S#744273  
Solvent = CHLOROFORM-D  
Creation\_time = 26-NOV-2015 20:11:05  
Revision\_time = 26-NOV-2015 20:48:16  
Current\_time = 26-NOV-2015 20:51:06

Comment = single pulse decouple  
Data\_format = 1D COMPLEX  
Dim\_size = 26214  
Dim\_title = 13C  
Dim\_units = [ppm]  
Dimensions = X  
Site = ECS 400  
Spectrometer = JNM-ECS400

Field\_strength = 9.20197068[T] (390[MH  
X\_acq\_duration = 1.06430464[s]  
X\_domain = 13C  
X\_freq = 98.51479726[MHz]  
X\_offset = 100[ppm]  
X\_points = 32768  
X\_prescans = 4  
X\_resolution = 0.93958061[Hz]  
X\_sweep = 30.78817734[kHz]  
Irr\_domain = 1H  
Irr\_freq = 391.78655441[MHz]  
Irr\_offset = 5[ppm]  
Clipped = FALSE  
Mod\_return = 1  
Scans = 119  
Total\_scans = 119

X\_90\_width = 8.8[us]  
X\_acq\_time = 1.06430464[s]  
X\_angle = 30[deg]  
X\_atn = 4.9[dB]  
X\_pulse = 2.93333333[us]  
Irr\_atn\_dec = 22.52628[dB]  
Irr\_atn\_noe = 22.52628[dB]  
Irr\_noise = WALTZ  
Decoupling = TRUE  
Initial\_wait = 1[s]  
Noe = TRUE  
Noe\_time = 2[s]  
Recvr\_gain = 60  
Relaxation\_delay = 2[s]  
Repetition\_time = 3.06430464[s]  
Temp\_get = 21.2[dc]

X : parts per Million : 13C

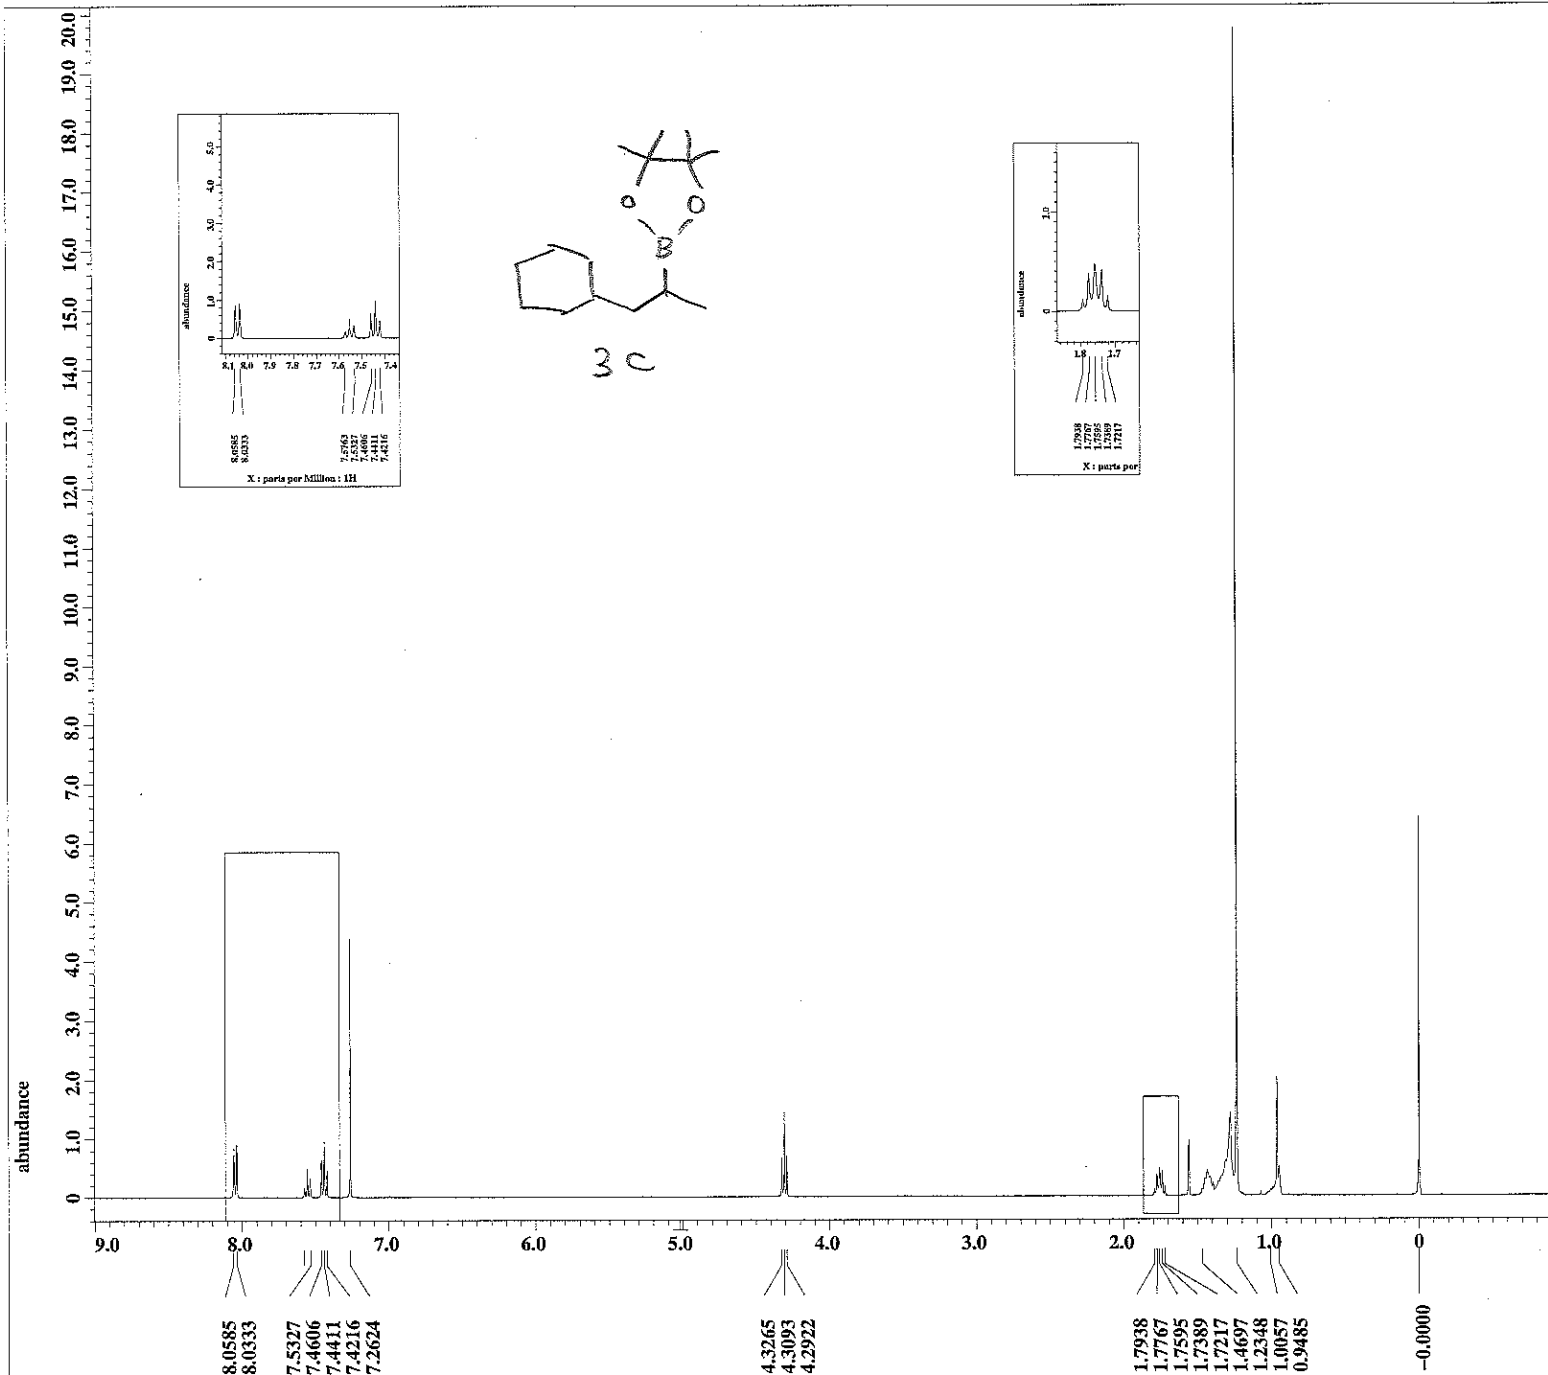

X : parts per Million : 1H

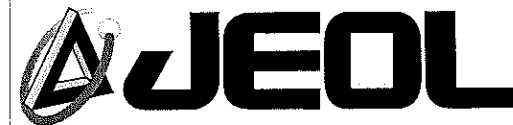

----- PROCESSING PARAMETERS -----

dc\_balance : 0 : FALSE  
 sexp : 0.2[Hz] : 0.0[s]  
 trapezoid3 : 0[%] : 80[%] : 100[%]  
 zerofill : 1  
 fft : 1 : TRUE : TRUE  
 machinephase  
 ppm

Derived from: IWA-859-pure-1.jdf

Filename = IWA-859-pure-3.jdf  
 Author = element  
 Experiment = single\_pulse.ex2  
 Sample\_id = S#744326  
 Solvent = CHLOROFORM-D  
 Creation\_time = 28-OCT-2015 20:09:24  
 Revision\_time = 4-DEC-2015 20:33:21  
 Current\_time = 4-DEC-2015 20:33:23

Comment = single\_pulse  
 Data\_format = 1D COMPLEX  
 Dim\_size = 13107  
 Dim\_title = 1H  
 Dim\_units = [ppm]  
 Dimensions = X  
 Site = ECS 400  
 Spectrometer = JNM-ECS400

Field\_strength = 9.20197068[T] {390[MH]  
 X\_acq\_duration = 2.228224[s]  
 X\_domain = 1H  
 X\_freq = 391.78655441[MHz]  
 X\_offset = 5[ppm]  
 X\_points = 16384  
 X\_prescans = 1  
 X\_resolution = 0.44878791[Hz]  
 X\_sweep = 7.35294118[kHz]  
 Irr\_domain = 1H  
 Irr\_freq = 391.78655441[MHz]  
 Irr\_offset = 5[ppm]  
 Tri\_domain = 1H  
 Tri\_freq = 391.78655441[MHz]  
 Tri\_offset = 5[ppm]  
 Clipped = FALSE  
 Mod\_return = 1  
 Scans = 8  
 Total\_scans = 8

X\_90\_width = 10.7[us]  
 X\_acq\_time = 2.228224[s]  
 X\_angle = 45[deg]  
 X\_atn = 1.9[dB]  
 X\_pulse = 5.35[us]  
 Irr\_mode = Off  
 Tri\_mode = Off  
 Dante\_presat = FALSE  
 Initial\_wait = 1[s]  
 Recvr\_gain = 46  
 Relaxation\_delay = 5[s]  
 Repetition\_time = 7.228224[s]  
 Temp\_get = 20.5[dc]



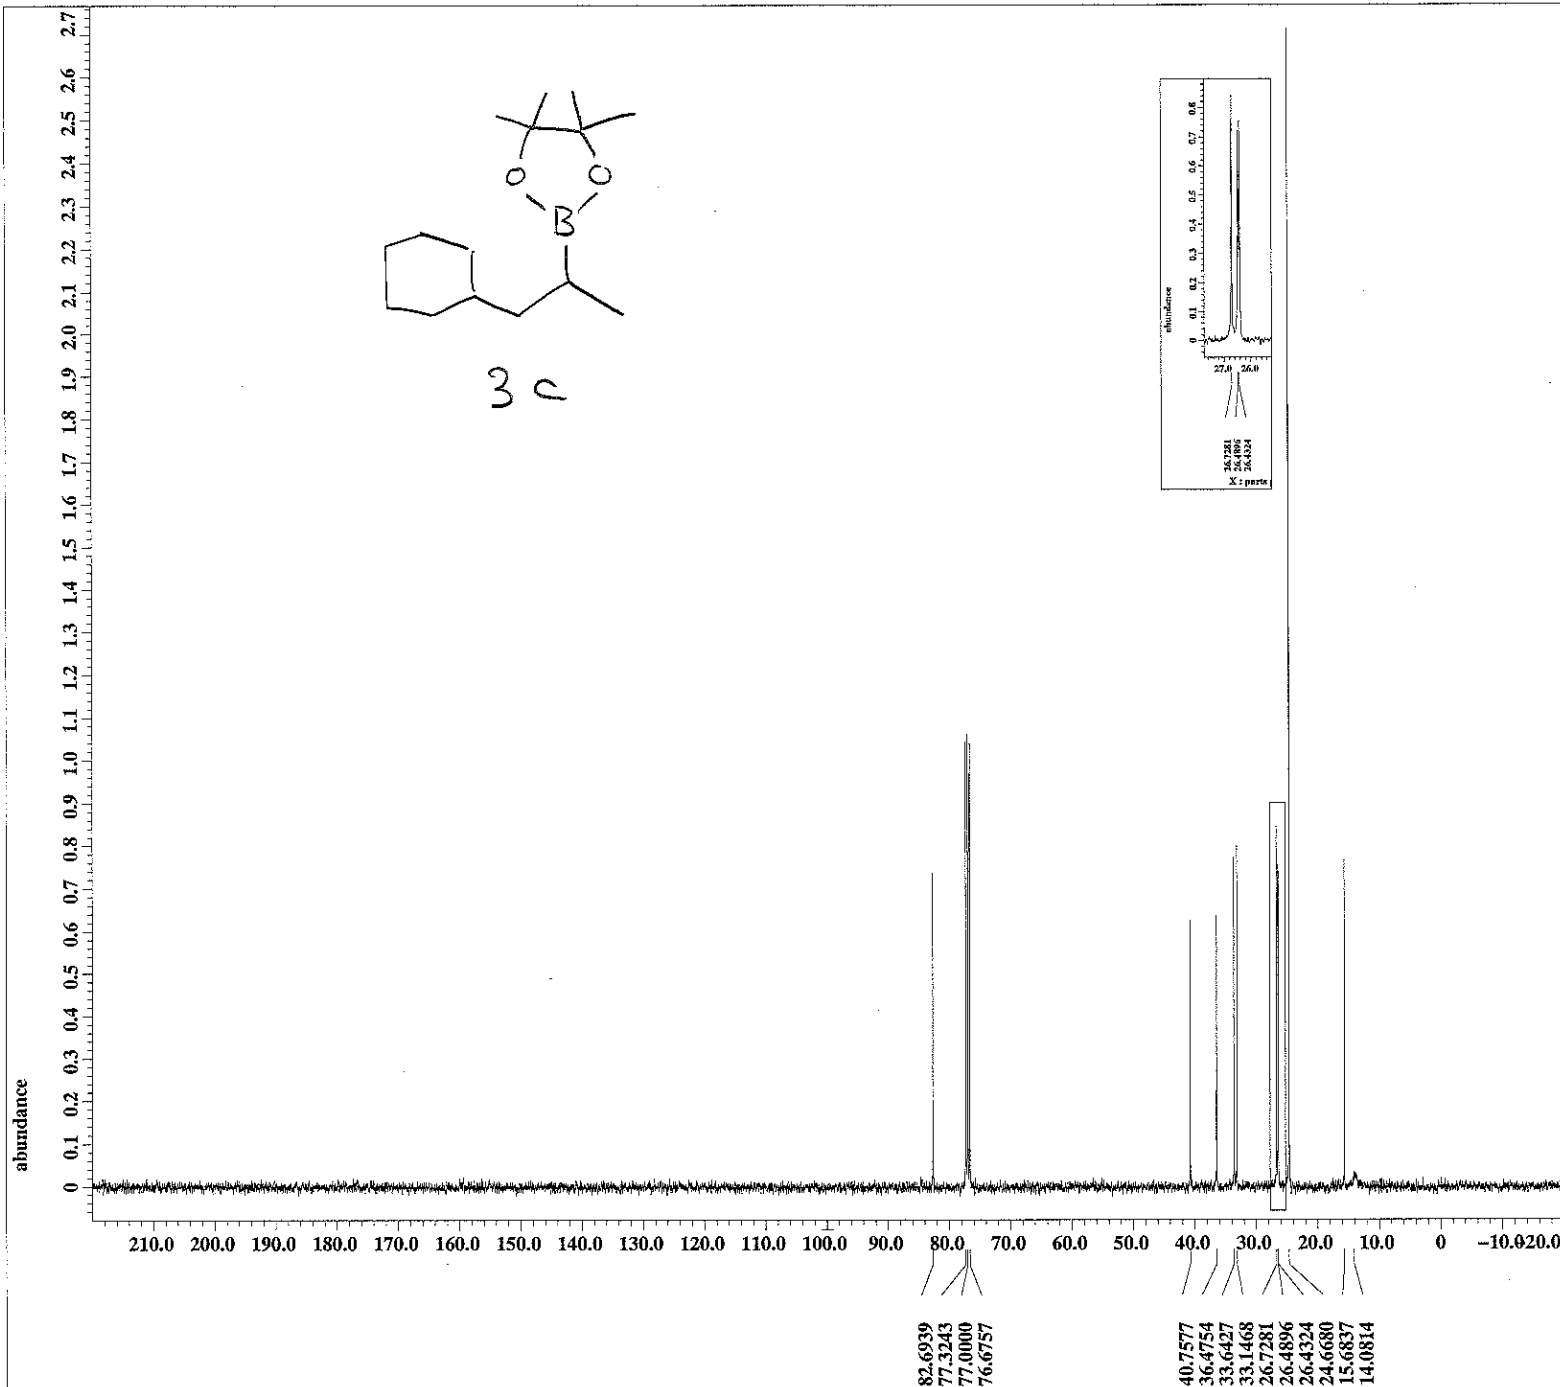

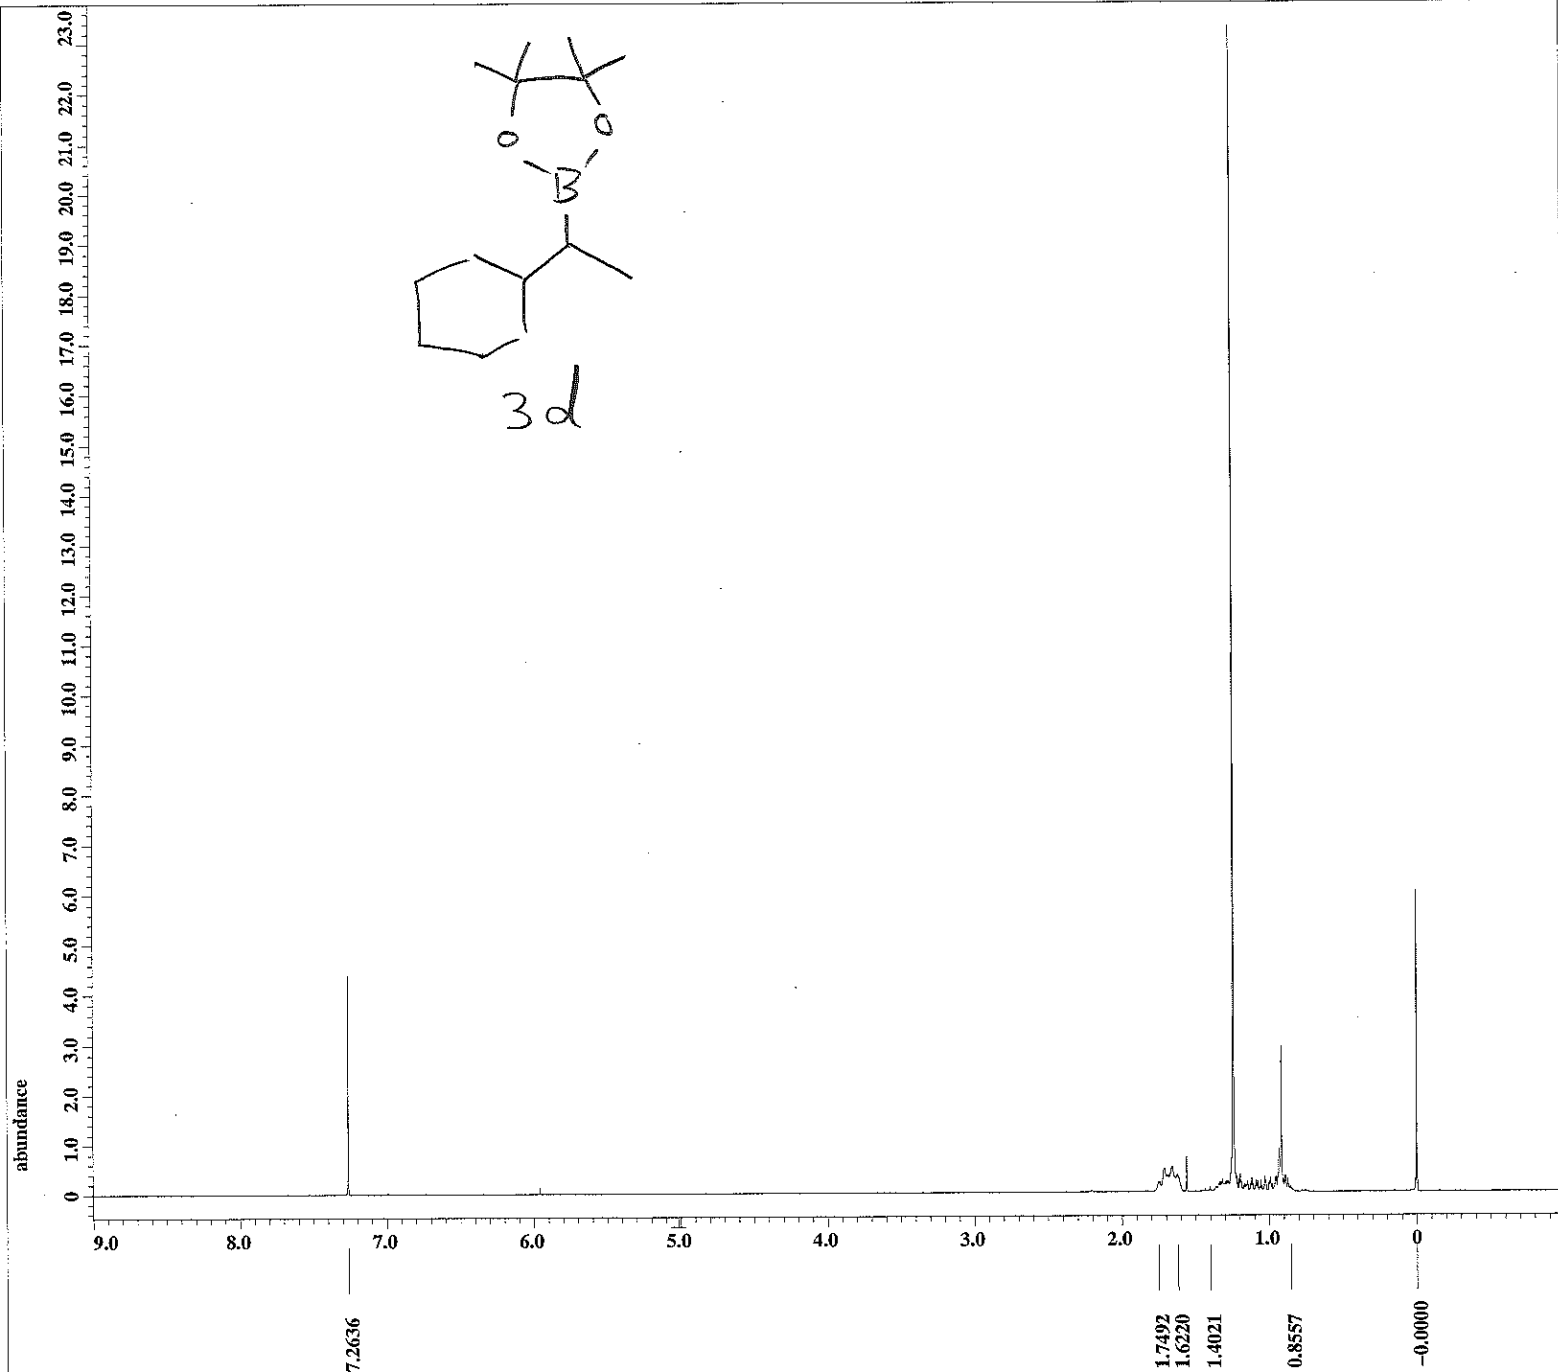

X : parts per Million : 1H

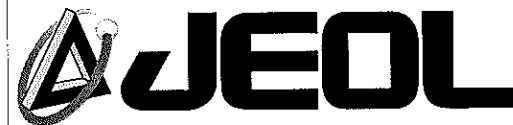

----- PROCESSING PARAMETERS -----  
 dc\_balance : 0 : FALSE  
 secp : 0.2[Hz] : 0.0[s]  
 trapezoid3 : 0[%] : 80[%] : 100[%]  
 zerofill : 1  
 fft : 1 : TRUE : TRUE  
 machinephase  
 ppm

Derived from: IWA-877-pure-1.jdf

Filename = IWA-877-pure-4.jdf  
 Author = element  
 Experiment = single\_pulse.ex2  
 Sample\_id = S#705530  
 Solvent = CHLOROFORM-D  
 Creation\_time = 11-NOV-2015 19:03:17  
 Revision\_time = 11-NOV-2015 19:46:39  
 Current\_time = 11-NOV-2015 19:46:42

Comment = single\_pulse  
 Data\_format = 1D COMPLEX  
 Dim\_size = 13107  
 Dim\_title = 1H  
 Dim\_units = [ppm]  
 Dimensions = X  
 Site = ECS 400  
 Spectrometer = JNM-ECS400

Field\_strength = 9.20197068[T] (390[MH  
 X\_acq\_duration = 2.228224[s]  
 X\_domain = 1H  
 X\_freq = 391.78655441[MHz]  
 X\_offset = 5[ppm]  
 X\_points = 16384  
 X\_prescans = 1  
 X\_resolution = 0.44878791[Hz]  
 X\_sweep = 7.35294118[kHz]  
 Irr\_domain = 1H  
 Irr\_freq = 391.78655441[MHz]  
 Irr\_offset = 5[ppm]  
 Tri\_domain = 1H  
 Tri\_freq = 391.78655441[MHz]  
 Tri\_offset = 5[ppm]  
 Clipped = FALSE  
 Mod\_return = 1  
 Scans = 8  
 Total\_scans = 8

X\_90\_width = 10.7[us]  
 X\_acq\_time = 2.228224[s]  
 X\_angle = 45[deg]  
 X\_atn = 1.9[dB]  
 X\_pulse = 5.35[us]  
 Irr\_mode = Off  
 Tri\_mode = Off  
 Dante\_presat = FALSE  
 Initial\_wait = 1[s]  
 Recvr\_gain = 44  
 Relaxation\_delay = 5[s]  
 Repetition\_time = 7.228224[s]  
 Temp\_get = 18.6[dC]

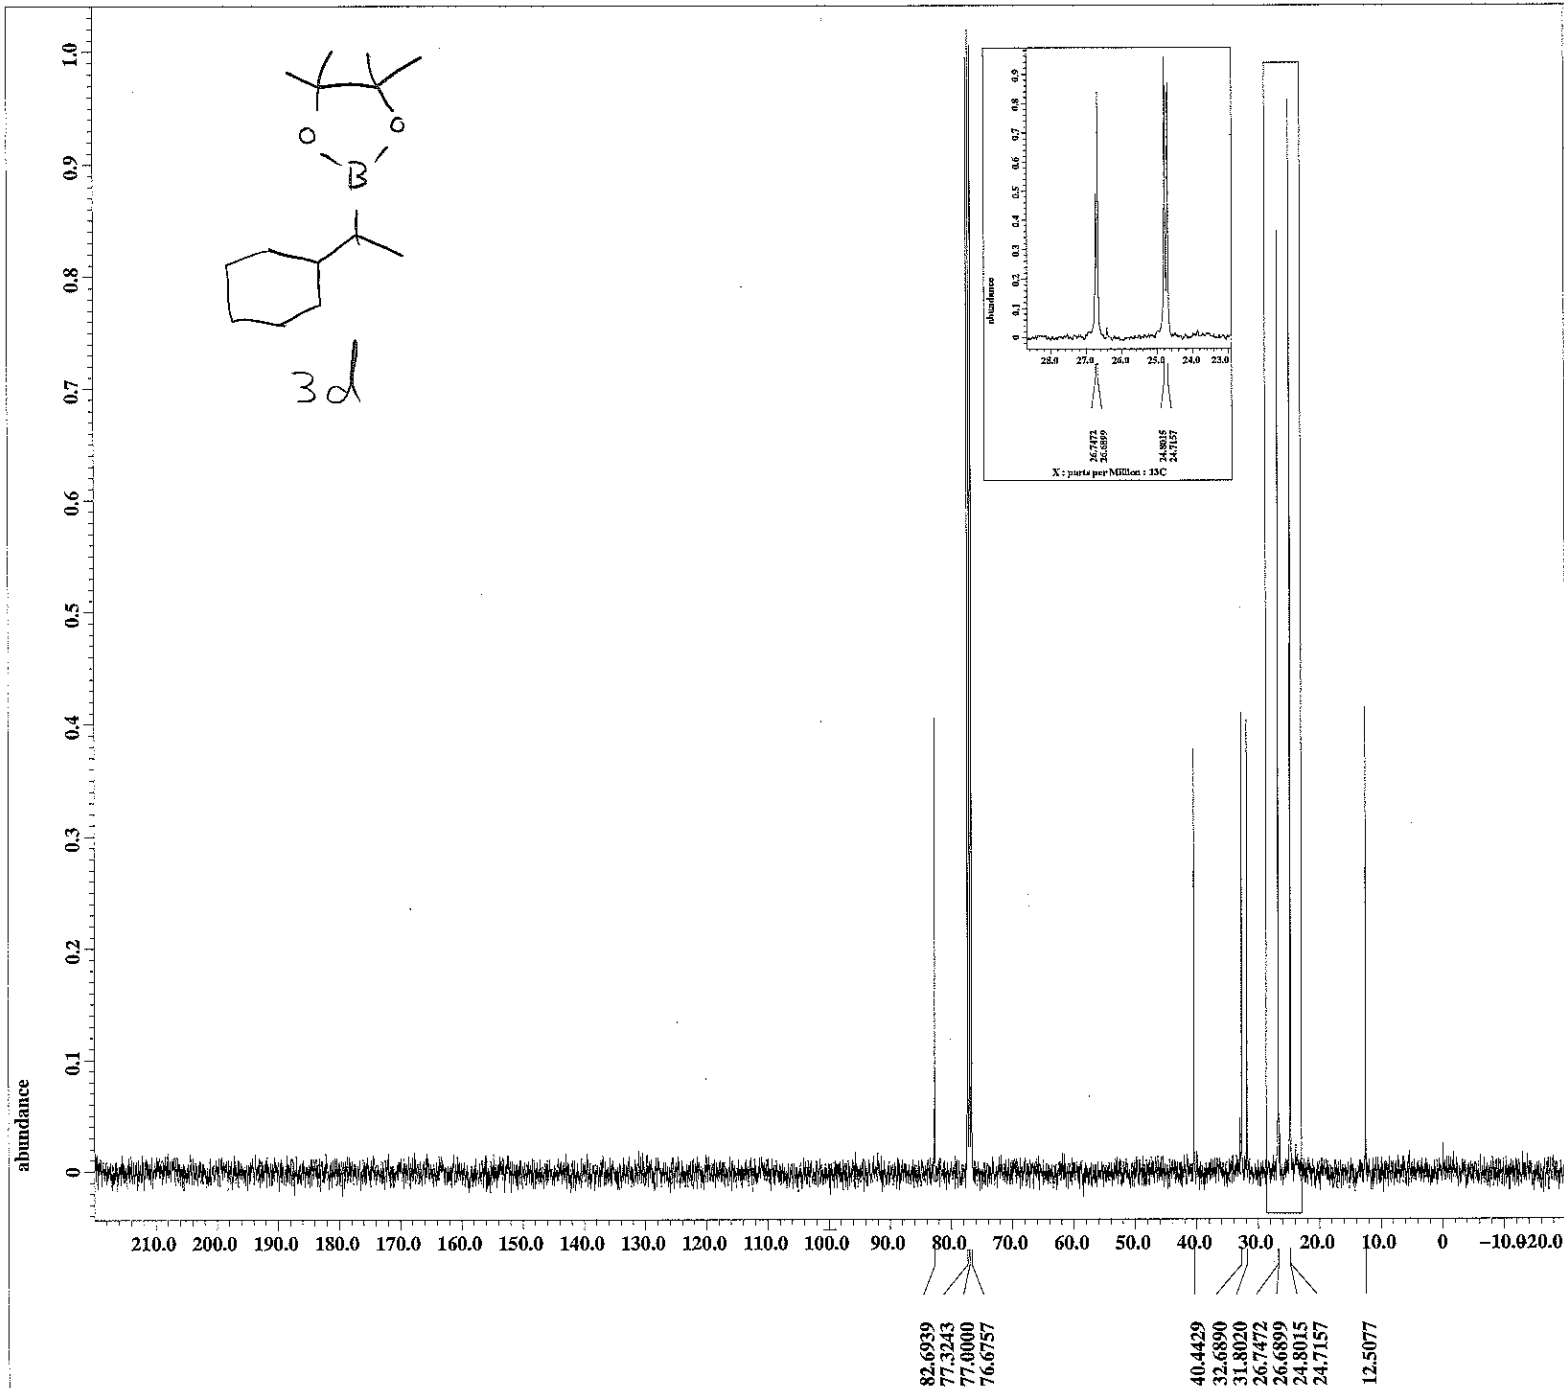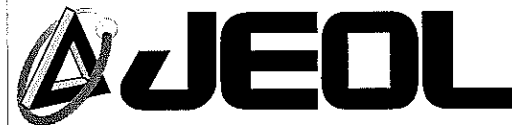

----- PROCESSING PARAMETERS -----  
 dc\_balance : 0 : FALSE  
 secp : 2.0[Hz] : 0.0[s]  
 trapezoid3 : 0[%] : 80[%] : 100[%]  
 zerofill : 1  
 fft : 1 : TRUE : TRUE  
 machinephase  
 ppm

Derived from: IWA-877-carbon-1.jdf

Filename = IWA-877-carbon-3.jdf  
 Author = element  
 Experiment = single\_pulse\_dec  
 Sample\_id = S#709204  
 Solvent = CHLOROFORM-D  
 Creation\_time = 11-NOV-2015 19:14:18  
 Revision\_time = 11-NOV-2015 19:50:36  
 Current\_time = 11-NOV-2015 20:01:03

Comment = single pulse decouple  
 Data\_format = 1D COMPLEX  
 Dim\_size = 26214  
 Dim\_title = 13C  
 Dim\_units = [ppm]  
 Dimensions = X  
 Site = ECS 400  
 Spectrometer = JNM-ECS400

Field\_strength = 9.20197068[T] (390[MH  
 X\_acq\_duration = 1.06430464[s]  
 X\_domain = 13C  
 X\_freq = 98.51479726[MHz]  
 X\_offset = 100[ppm]  
 X\_points = 32768  
 X\_prescans = 4  
 X\_resolution = 0.93958061[Hz]  
 X\_sweep = 30.78817734[kHz]  
 Irr\_domain = 1H  
 Irr\_freq = 391.78655441[MHz]  
 Irr\_offset = 5[ppm]  
 Clipped = FALSE  
 Mod\_return = 1  
 Scans = 127  
 Total\_scans = 127

X\_90\_width = 8.8[us]  
 X\_acq\_time = 1.06430464[s]  
 X\_angle = 30[deg]  
 X\_atn = 4.9[db]  
 X\_pulse = 2.93333333[us]  
 Irr\_atn\_dec = 22.52628[db]  
 Irr\_atn\_noe = 22.52628[db]  
 Irr\_noise = WALTZ  
 Decoupling = TRUE  
 Initial\_wait = 1[s]  
 Noe = TRUE  
 Noe\_time = 2[s]  
 Recvr\_gain = 60  
 Relaxation\_delay = 2[s]  
 Repetition\_time = 3.06430464[s]  
 Temp\_get = 19.5[dc]

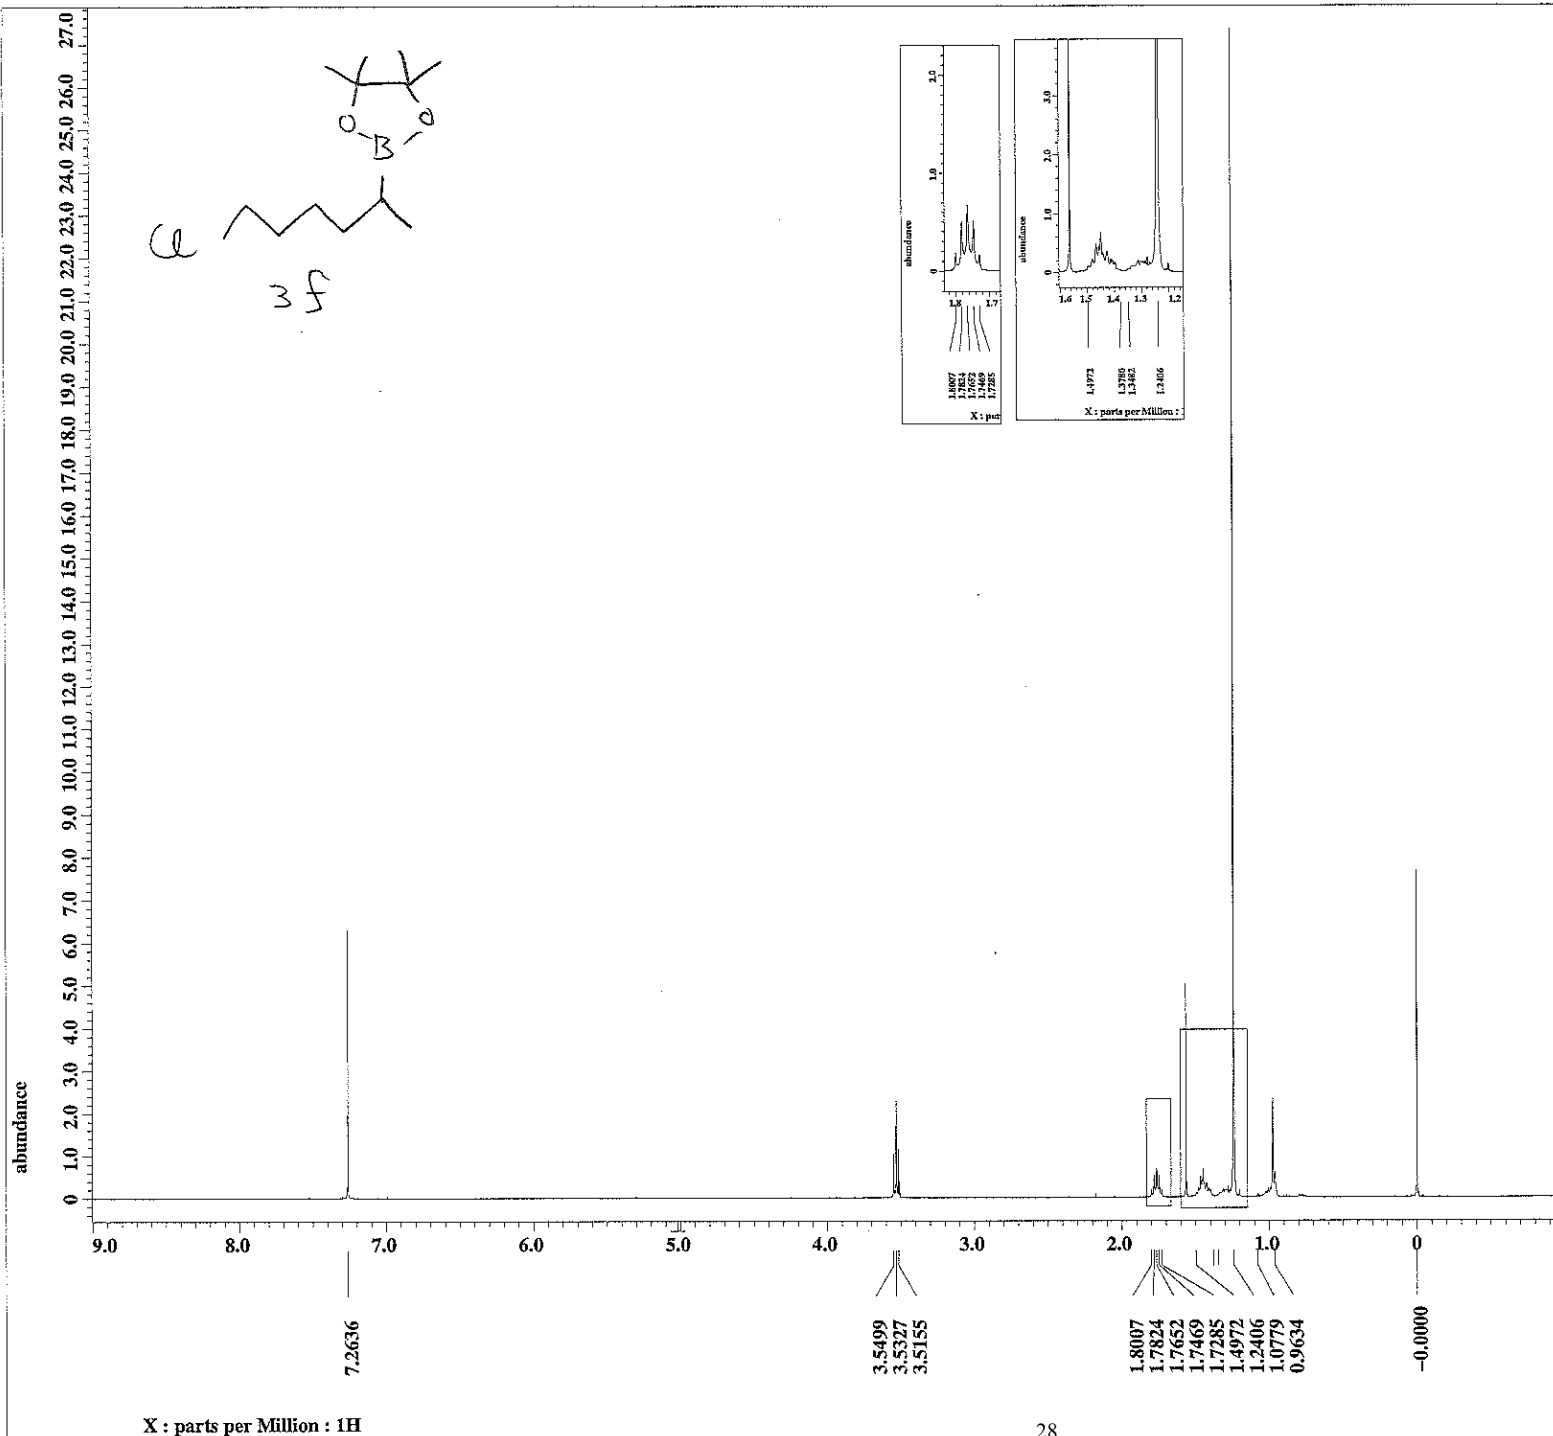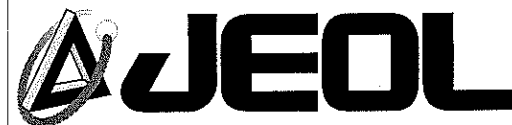

----- PROCESSING PARAMETERS -----  
 dc\_balance : 0 : FALSE  
 secp : 0.2[Hz] : 0.0[s]  
 trapezoid3 : 0[%] : 80[%] : 100[%]  
 zerofill : 1  
 fft : 1 : TRUE : TRUE  
 machinephase  
 ppm

Derived from: IWA-874-pure-1.jdf

Filename = IWA-874-pure-4.jdf  
 Author = element  
 Experiment = single\_pulse.ex2  
 Sample\_id = S#775787  
 Solvent = CHLOROFORM-D  
 Creation\_time = 7-NOV-2015 21:00:26  
 Revision\_time = 23-JAN-2016 18:56:25  
 Current\_time = 23-JAN-2016 18:56:28

Comment = single\_pulse  
 Data\_format = 1D COMPLEX  
 Dim\_size = 13107  
 Dim\_title = 1H  
 Dim\_units = [ppm]  
 Dimensions = X  
 Site = ECS 400  
 Spectrometer = JNM-ECS400

Field\_strength = 9.20197068[T] (390[MH]  
 X\_acq\_duration = 2.228224[s]  
 X\_domain = 1H  
 X\_freq = 391.78655441[MHz]  
 X\_offset = 5[ppm]  
 X\_points = 16384  
 X\_prescans = 1  
 X\_resolution = 0.44878791[Hz]  
 X\_sweep = 7.35294118[kHz]  
 Irr\_domain = 1H  
 Irr\_freq = 391.78655441[MHz]  
 Irr\_offset = 5[ppm]  
 Tri\_domain = 1H  
 Tri\_freq = 391.78655441[MHz]  
 Tri\_offset = 5[ppm]  
 Clipped = FALSE  
 Mod\_return = 1  
 Scans = 8  
 Total\_scans = 8

X\_90\_width = 10.7[us]  
 X\_acq\_time = 2.228224[s]  
 X\_angle = 45[deg]  
 X\_atn = 1.9[dB]  
 X\_pulse = 5.35[us]  
 Irr\_mode = Off  
 Tri\_mode = Off  
 Dante\_presat = FALSE  
 Initial\_wait = 1[s]  
 Recvr\_gain = 46  
 Relaxation\_delay = 5[s]  
 Repetition\_time = 7.228224[s]  
 Temp\_get = 18.8[dc]

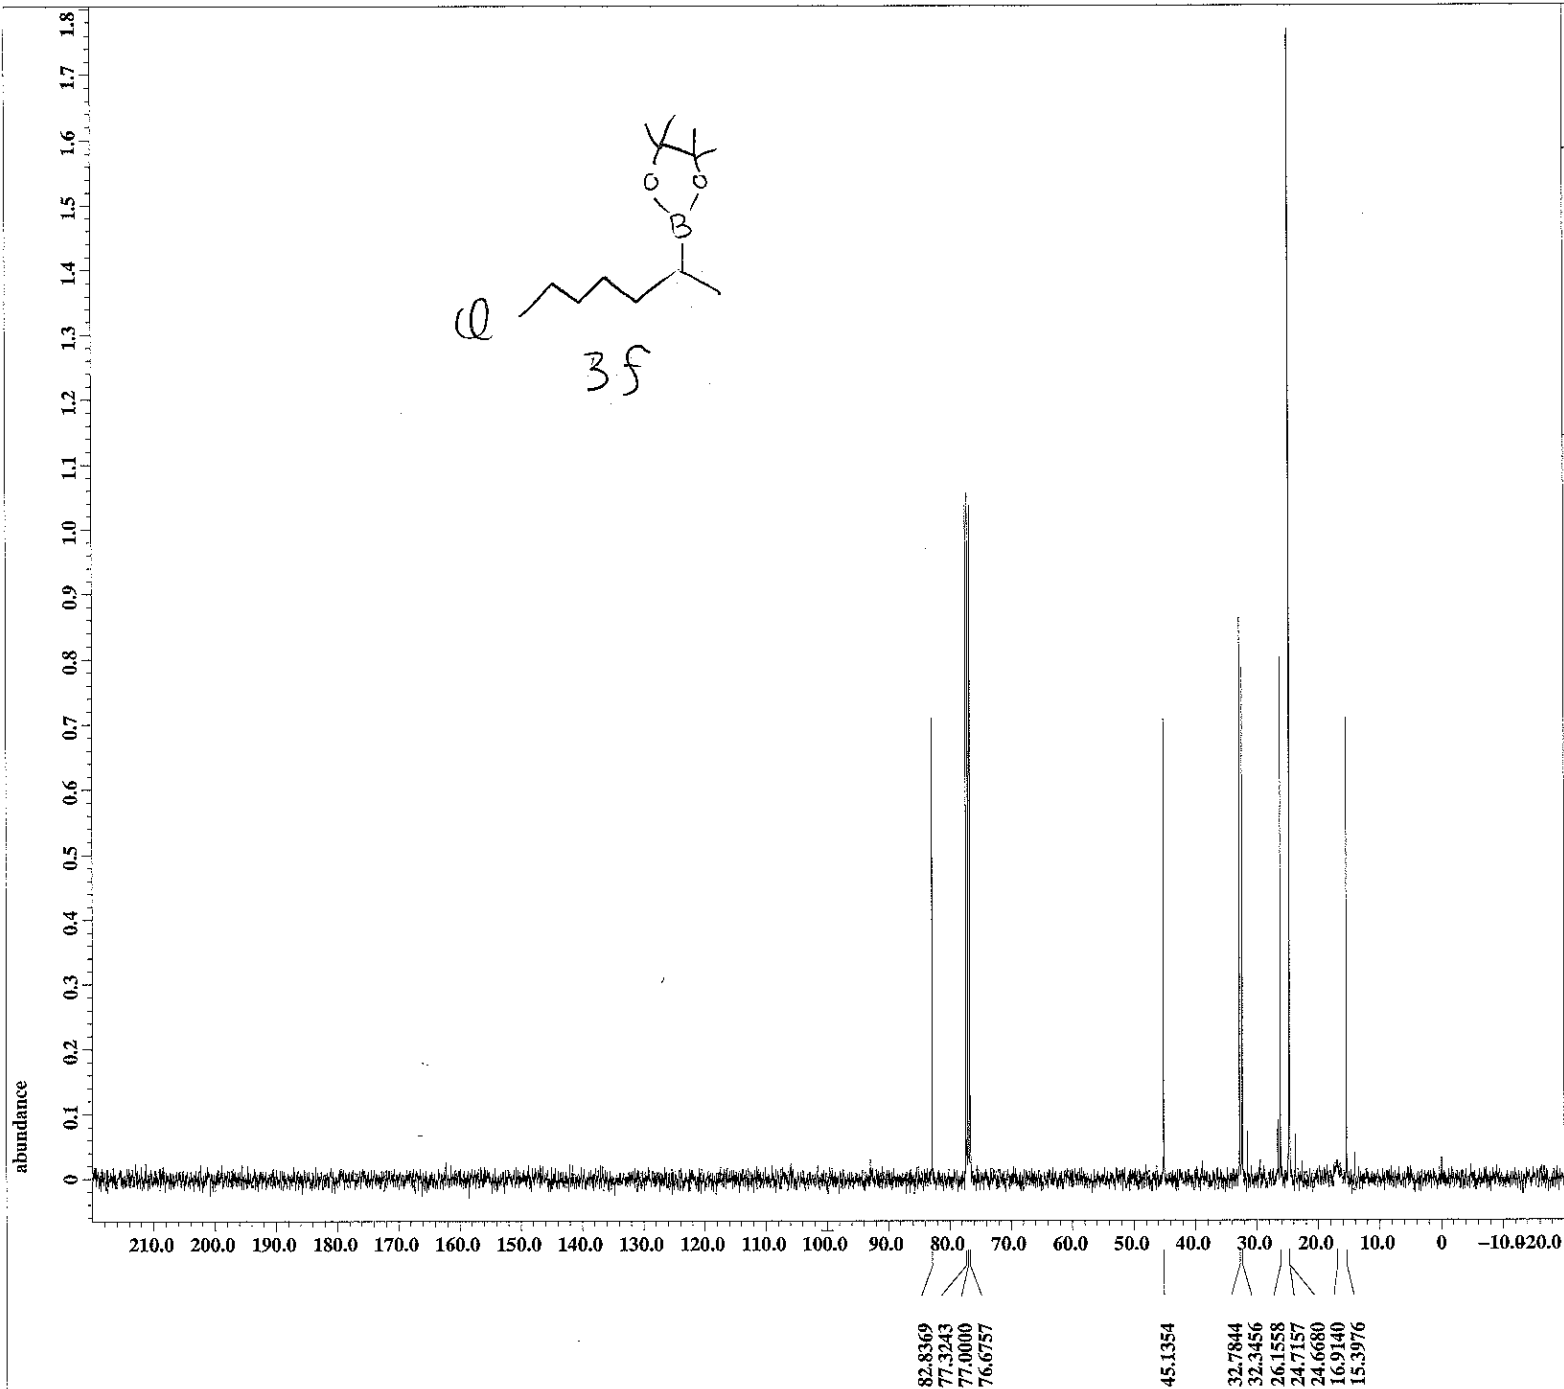

X : parts per Million : 13C

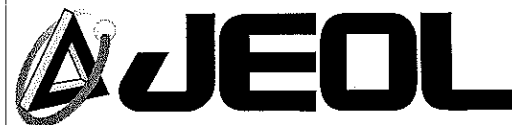

----- PROCESSING PARAMETERS -----  
 dc\_balance : 0 : FALSE  
 secp : 2.0[Hz] : 0.0[s]  
 trapezoid3 : 0[%] : 80[%] : 100[%]  
 zerofill : 1  
 fft : 1 : TRUE : TRUE  
 machinephase  
 ppm

Derived from: IWA-874-carbon-1.jdf

Filename = IWA-874-carbon-3.jdf  
 Author = element  
 Experiment = single\_pulse\_dec  
 Sample\_id = S#779350  
 Solvent = CHLOROFORM-D  
 Creation\_time = 7-NOV-2015 21:09:27  
 Revision\_time = 23-JAN-2016 19:46:13  
 Current\_time = 23-JAN-2016 19:46:58

Comment = single pulse decouple  
 Data\_format = 1D COMPLEX  
 Dim\_size = 26214  
 Dim\_title = 13C  
 Dim\_units = [ppm]  
 Dimensions = X  
 Site = ECS 400  
 Spectrometer = JNM-ECS400

Field\_strength = 9.20197068[T] (390[MH  
 X\_acq\_duration = 1.06430464[s]  
 X\_domain = 13C  
 X\_freq = 98.51479726[MHz]  
 X\_offset = 100[ppm]  
 X\_points = 32768  
 X\_prescans = 4  
 X\_resolution = 0.93958061[Hz]  
 X\_sweep = 30.78817734[kHz]  
 Irr\_domain = 1H  
 Irr\_freq = 391.78655441[MHz]  
 Irr\_offset = 5[ppm]  
 Clipped = FALSE  
 Mod\_return = 1  
 Scans = 81  
 Total\_scans = 81

X\_90\_width = 8.8[us]  
 X\_acq\_time = 1.06430464[s]  
 X\_angle = 30[deg]  
 X\_atn = 4.9[dB]  
 X\_pulse = 2.93333333[us]  
 Irr\_atn\_dec = 22.52628[db]  
 Irr\_atn\_noe = 22.52628[db]  
 Irr\_noise = WALTZ  
 Decoupling = TRUE  
 Initial\_wait = 1[s]  
 Noe = TRUE  
 Noe\_time = 2[s]  
 Recvr\_gain = 60  
 Relaxation\_delay = 2[s]  
 Repetition\_time = 3.06430464[s]  
 Temp\_get = 18.9[ac]

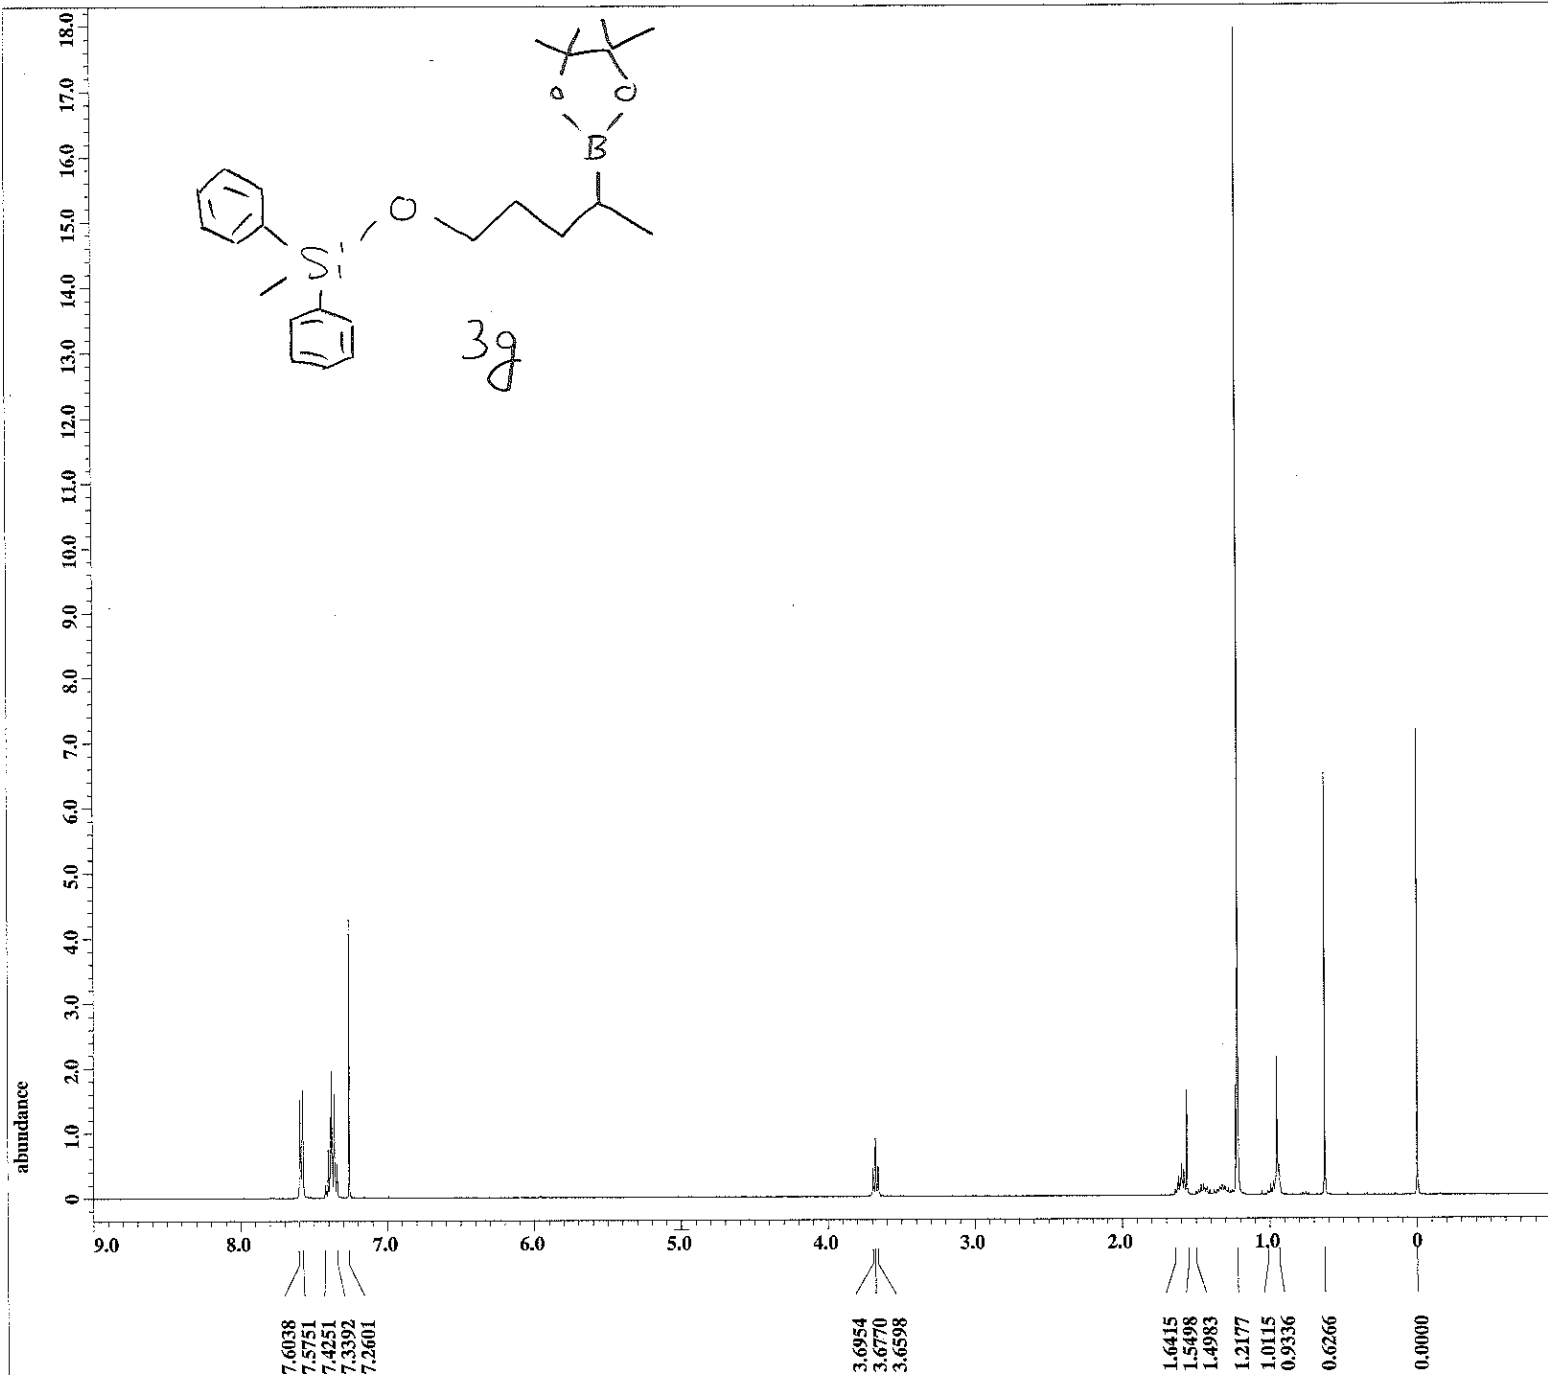

X : parts per Million : 1H

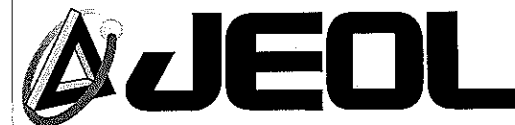

----- PROCESSING PARAMETERS -----  
 dc\_balance : 0 : FALSE  
 secp : 0.2[Hz] : 0.0[s]  
 trapezoid3 : 0[%] : 80[%] : 100[%]  
 zerofill : 1  
 fft : 1 : TRUE : TRUE  
 machinephase  
 ppm

Derived from: IWA-851-pure1-1.jdf

Filename = IWA-851-pure1-3.jdf  
 Author = element  
 Experiment = single\_pulse.ex2  
 Sample\_id = S#572854  
 Solvent = CHLOROFORM-D  
 Creation\_time = 25-OCT-2015 15:24:03  
 Revision\_time = 25-OCT-2015 16:04:13  
 Current\_time = 25-OCT-2015 16:04:14

Comment = single\_pulse  
 Data\_format = 1D COMPLEX  
 Dim\_size = 13107  
 Dim\_title = 1H  
 Dim\_units = [ppm]  
 Dimensions = X  
 Site = ECS 400  
 Spectrometer = JNM-ECS400

Field\_strength = 9.20197068[T] (390[MH  
 X\_acq\_duration = 2.228224[s]  
 X\_domain = 1H  
 X\_freq = 391.78655441[MHz]  
 X\_offset = 5[ppm]  
 X\_points = 16384  
 X\_prescans = 1  
 X\_resolution = 0.44878791[Hz]  
 X\_sweep = 7.35294118[kHz]  
 Irr\_domain = 1H  
 Irr\_freq = 391.78655441[MHz]  
 Irr\_offset = 5[ppm]  
 Tri\_domain = 1H  
 Tri\_freq = 391.78655441[MHz]  
 Tri\_offset = 5[ppm]  
 Clipped = FALSE  
 Mod\_return = 1  
 Scans = 8  
 Total\_scans = 8

X\_90\_width = 10.7[us]  
 X\_acq\_time = 2.228224[s]  
 X\_angle = 45[deg]  
 X\_atn = 1.9[dB]  
 X\_pulse = 5.35[us]  
 Irr\_mode = Off  
 Tri\_mode = Off  
 Dante\_presat = FALSE  
 Initial\_wait = 1[s]  
 Recvr\_gain = 44  
 Relaxation\_delay = 5[s]  
 Repetition\_time = 7.228224[s]  
 Temp\_get = 18.1[dc]

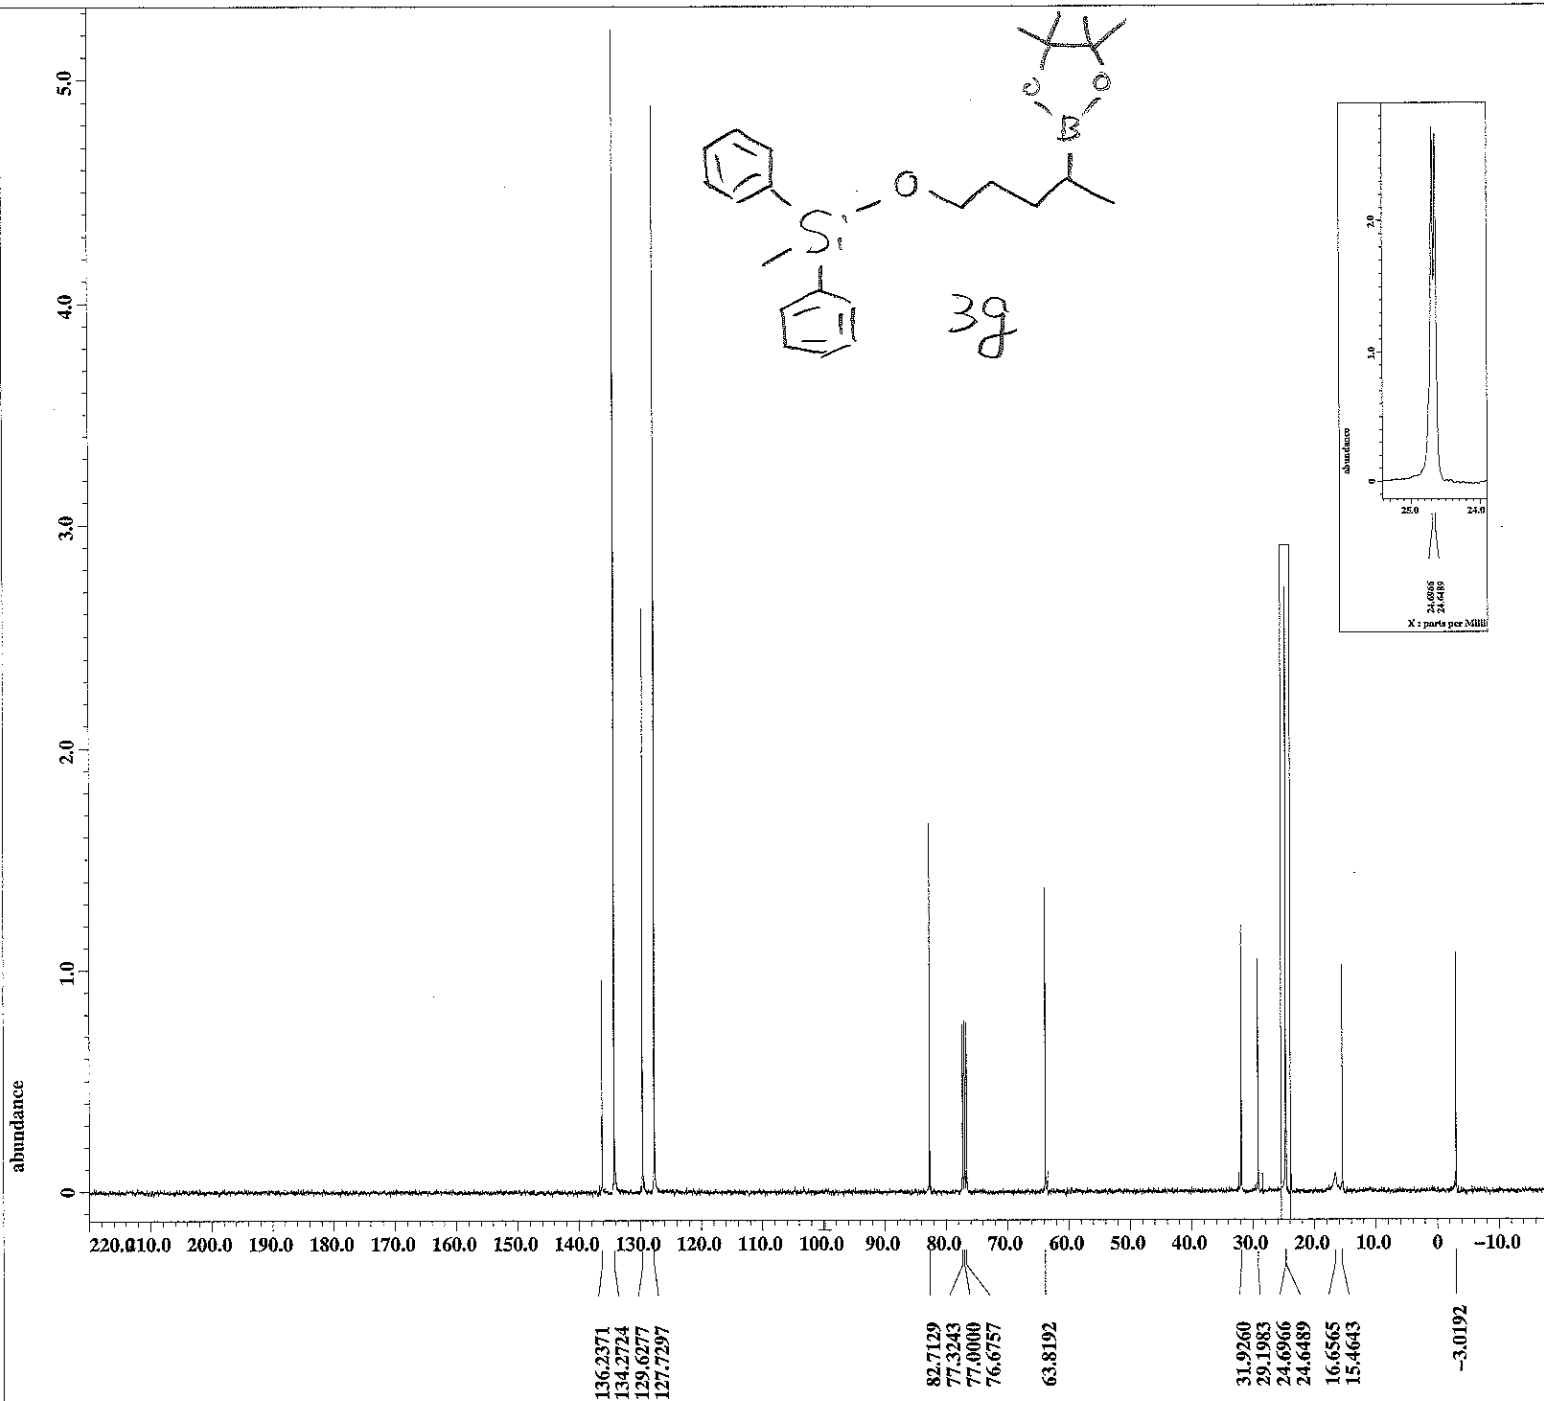

X : parts per Million : 13C

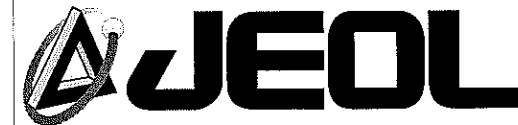

----- PROCESSING PARAMETERS -----  
 dc\_balance : 0 : FALSE  
 secp : 2.0[Hz] : 0.0[s]  
 trapezoid3 : 0[%] : 80[%] : 100[%]  
 zerofill : 1  
 fft : 1 : TRUE : TRUE  
 machinephase  
 ppm

Derived from: IWA-851-carbon-1.jdf

Filename = IWA-851-carbon-3.jdf  
 Author = element  
 Experiment = single\_pulse\_dec  
 Sample\_id = S#576830  
 Solvent = CHLOROFORM-D  
 Creation\_time = 25-OCT-2015 15:36:07  
 Revision\_time = 25-OCT-2015 16:09:48  
 Current\_time = 25-OCT-2015 16:10:41

Comment = single pulse decouple  
 Data\_format = 1D COMPLEX  
 Dim\_size = 26214  
 Dim\_title = 13C  
 Dim\_units = [ppm]  
 Dimensions = X  
 Site = ECS 400  
 Spectrometer = JNM-ECS400

Field\_strength = 9.20197068[T] (390[MH  
 X\_acq\_duration = 1.06430464[s]  
 X\_domain = 13C  
 X\_freq = 98.51479726[MHz]  
 X\_offset = 100[ppm]  
 X\_points = 32768  
 X\_prescans = 4  
 X\_resolution = 0.93958061[Hz]  
 X\_sweep = 30.78817734[kHz]  
 Irr\_domain = 1H  
 Irr\_freq = 391.78655441[MHz]  
 Irr\_offset = 5[ppm]  
 Clipped = FALSE  
 Mod\_return = 1  
 Scans = 128  
 Total\_scans = 128

X\_90\_width = 8.8[us]  
 X\_acq\_time = 1.06430464[s]  
 X\_angle = 30[deg]  
 X\_atn = 4.9[dB]  
 X\_pulse = 2.93333333[us]  
 Irr\_atn\_dec = 22.52628[dB]  
 Irr\_atn\_noe = 22.52628[dB]  
 Irr\_noise = WALTZ  
 Decoupling = TRUE  
 Initial\_wait = 1[s]  
 Noe = TRUE  
 Noe\_time = 2[s]  
 Recvr\_gain = 60  
 Relaxation\_delay = 2[s]  
 Repetition\_time = 3.06430464[s]  
 Temp\_get = 19.2[dc]





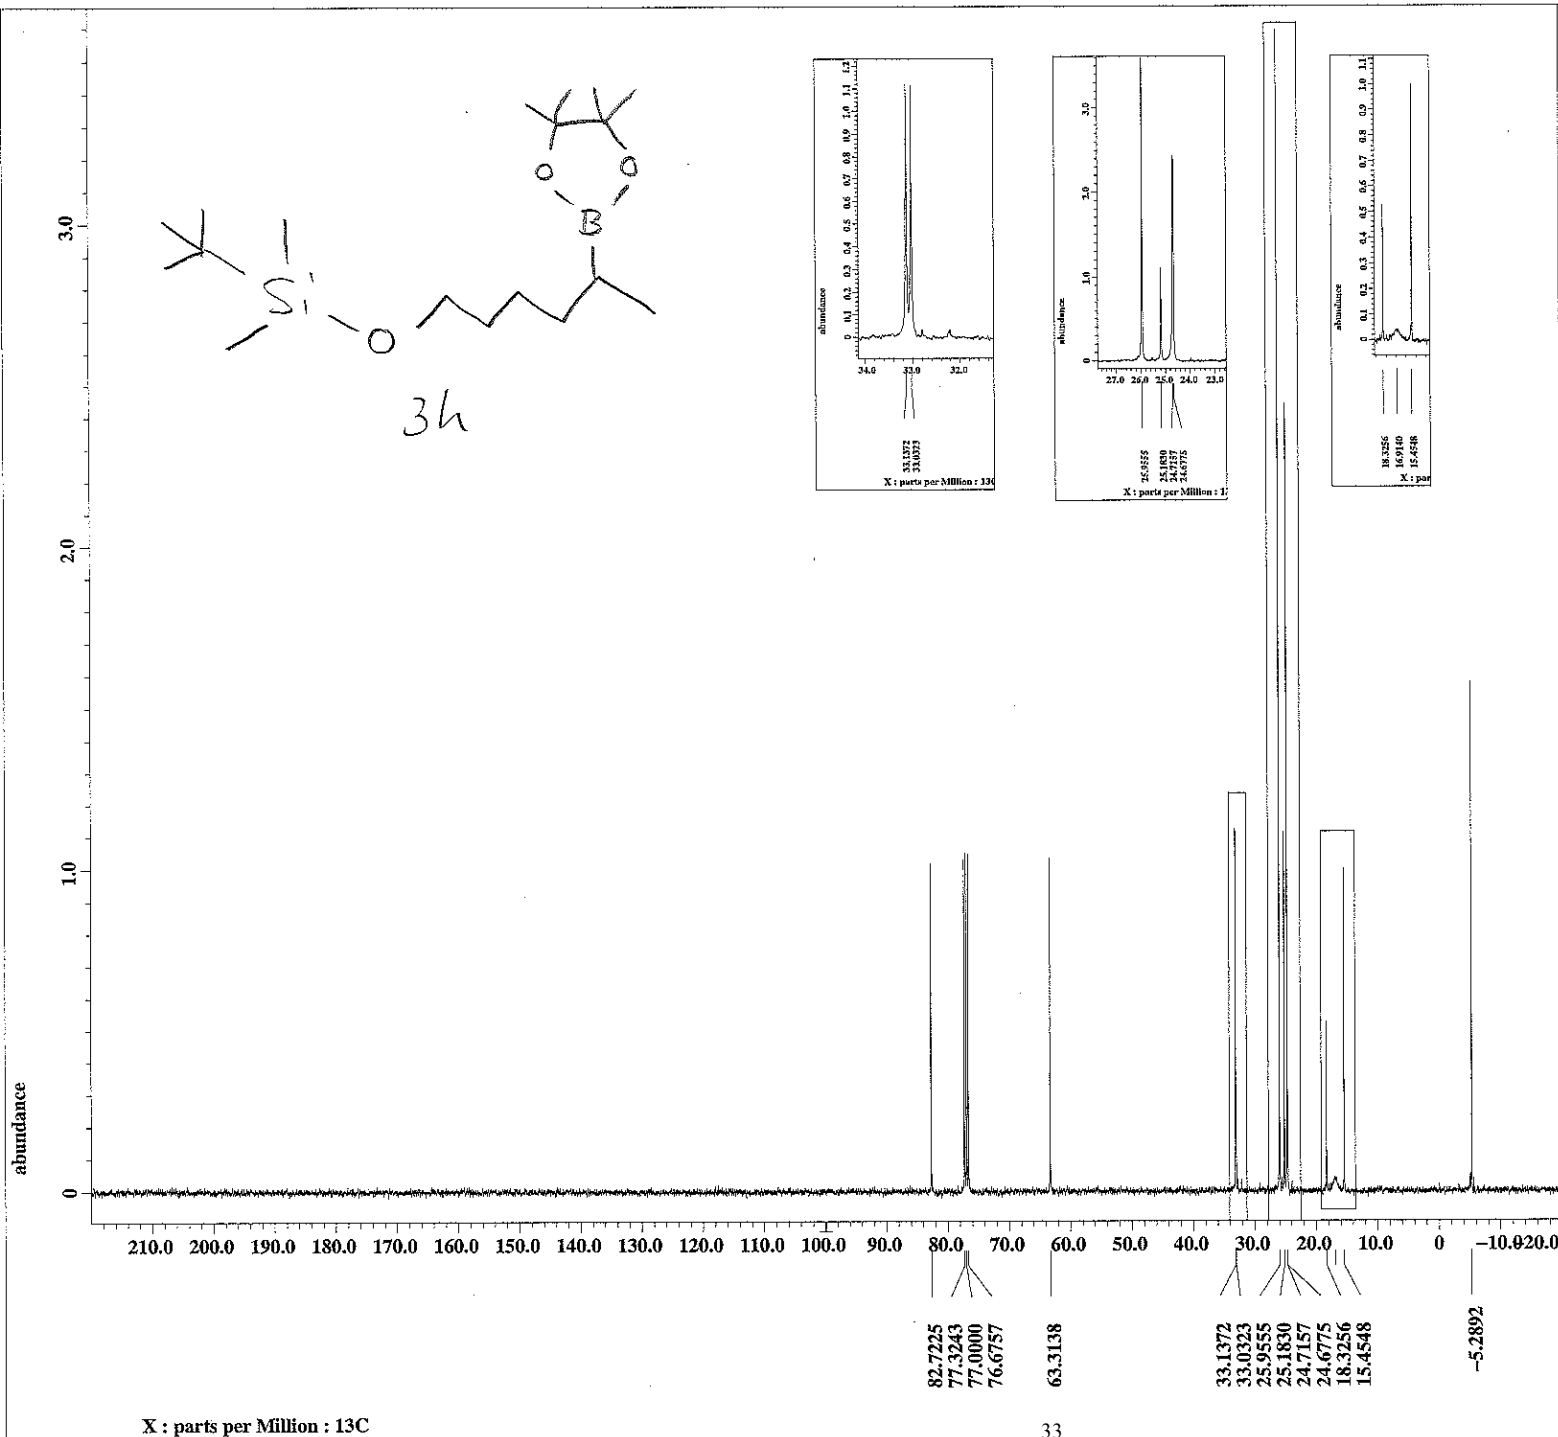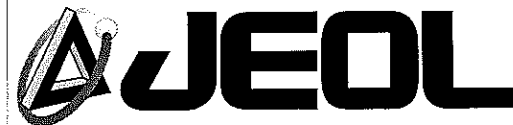

----- PROCESSING PARAMETERS -----  
 dc\_balance : 0 : FALSE  
 sexp : 2.0[Hz] : 0.0[s]  
 trapezoid3 : 0[%] : 80[%] : 100[%]  
 zerofill : 1  
 fft : 1 : TRUE : TRUE  
 machinephase  
 ppm

Derived from: IWA-785-carbon-1.jdf

Filename = IWA-785-carbon-3.jdf  
 Author = element  
 Experiment = single\_pulse\_dec  
 Sample\_id = S#730039  
 Solvent = CHLOROFORM-D  
 Creation\_time = 3-NOV-2015 19:50:57  
 Revision\_time = 3-NOV-2015 20:25:50  
 Current\_time = 3-NOV-2015 20:27:38

Comment = single pulse decouple  
 Data\_format = 1D COMPLEX  
 Dim\_size = 26214  
 Dim\_title = 13C  
 Dim\_units = [ppm]  
 Dimensions = X  
 Site = ECS 400  
 Spectrometer = JNM-ECS400

Field\_strength = 9.20197068[T] (390[MH  
 X\_acq\_duration = 1.06430464[s]  
 X\_domain = 13C  
 X\_freq = 98.51479726[MHz]  
 X\_offset = 100[ppm]  
 X\_points = 32768  
 X\_prescans = 4  
 X\_resolution = 0.93958061[Hz]  
 X\_sweep = 30.78817734[kHz]  
 Irr\_domain = 1H  
 Irr\_freq = 391.78655441[MHz]  
 Irr\_offset = 5[ppm]  
 Clipped = FALSE  
 Mod\_return = 1  
 Scans = 143  
 Total\_scans = 143

X\_90\_width = 8.8[us]  
 X\_acq\_time = 1.06430464[s]  
 X\_angle = 30[deg]  
 X\_atn = 4.9[db]  
 X\_pulse = 2.93333333[us]  
 Irr\_atn\_dec = 22.52628[db]  
 Irr\_atn\_noe = 22.52628[db]  
 Irr\_noise = WALTZ  
 Decoupling = TRUE  
 Initial\_wait = 1[s]  
 Noe = TRUE  
 Noe\_time = 2[s]  
 Recvr\_gain = 60  
 Relaxation\_delay = 2[s]  
 Repetition\_time = 3.06430464[s]  
 Temp\_get = 19.8[dc]

X : parts per Million : 13C

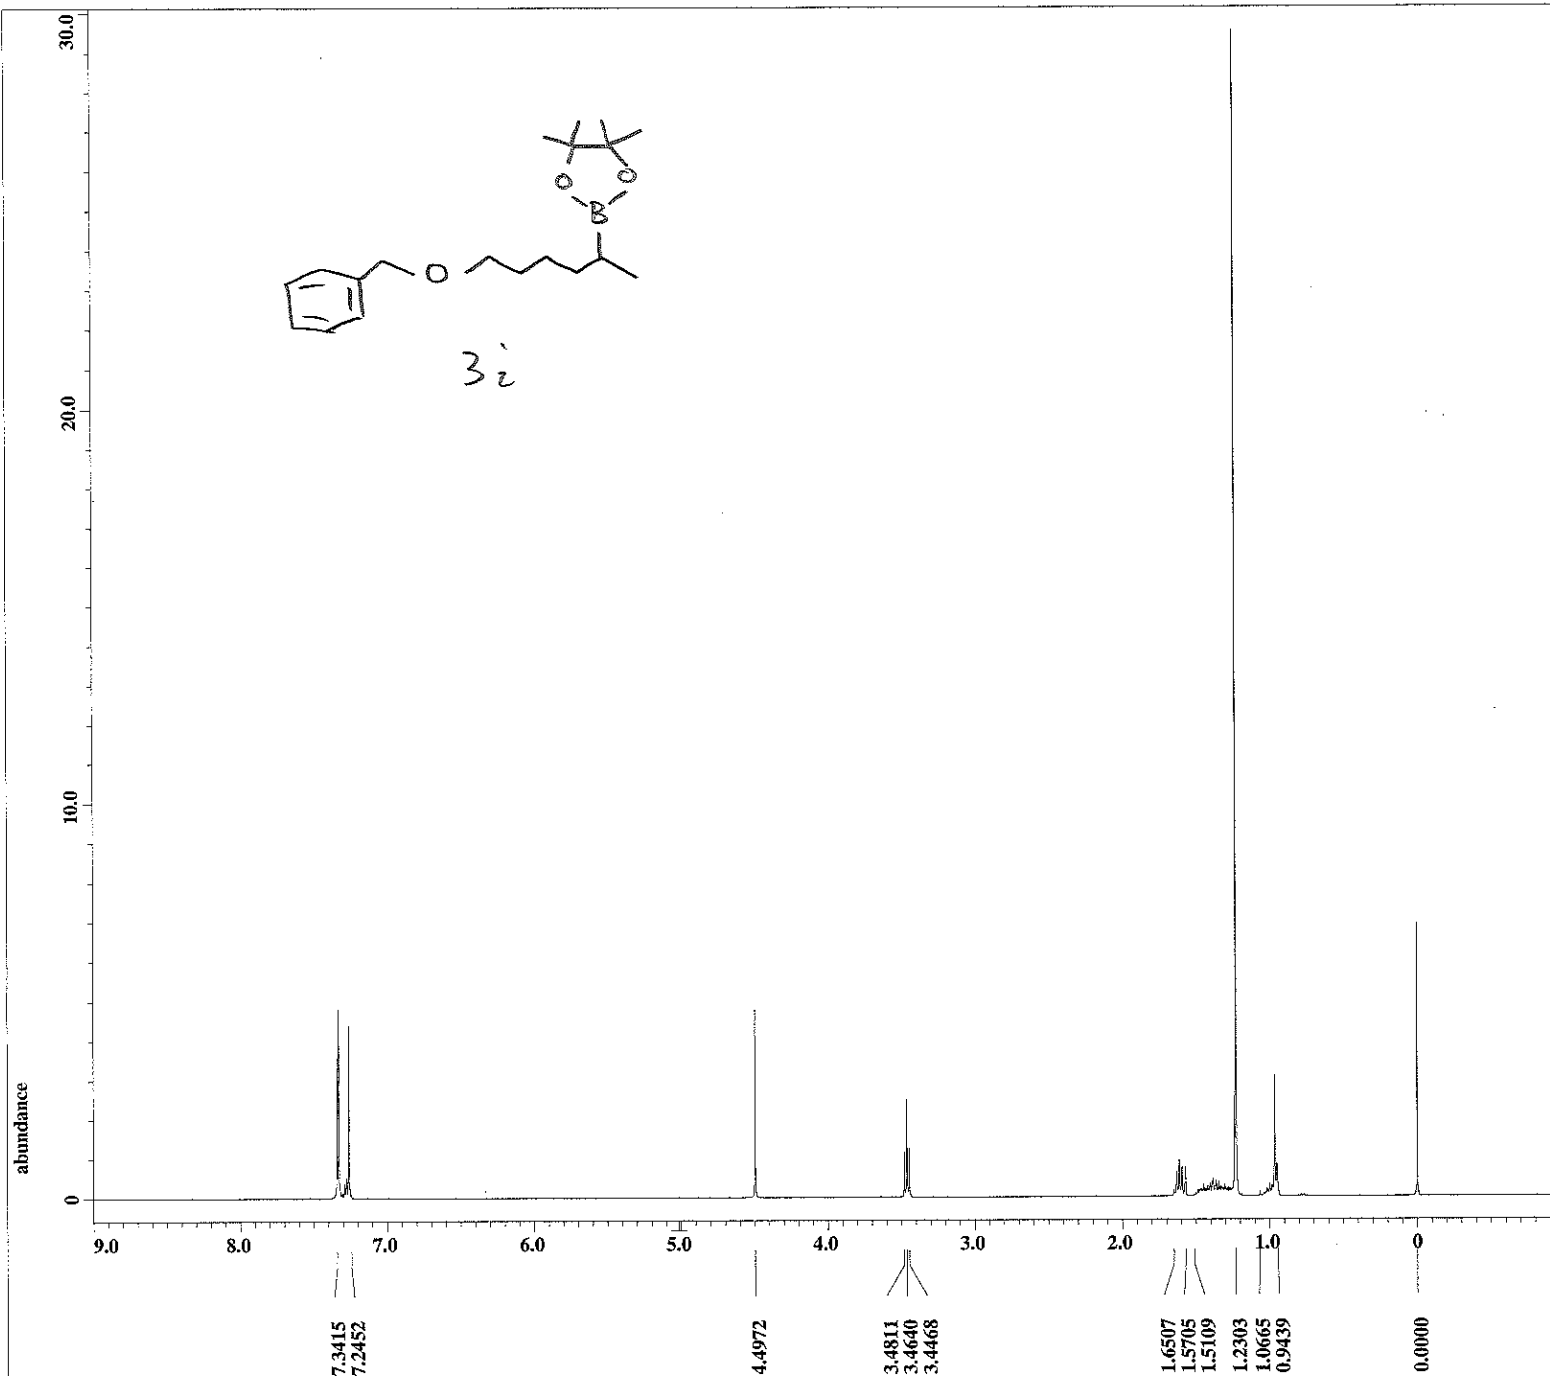

X : parts per Million : 1H

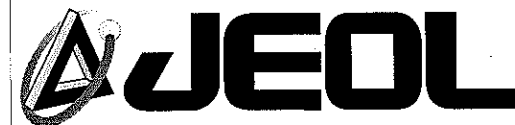

----- PROCESSING PARAMETERS -----  
 dc\_balance : 0 : FALSE  
 sexp : 0.2[Hz] : 0.0[s]  
 trapezoid3 : 0[%] : 80[%] : 100[%]  
 zerofill : 1  
 fft : 1 : TRUE : TRUE  
 machinephase  
 ppm

Derived from: IWA-853-pure-1.jdf

Filename = IWA-853-pure-4.jdf  
 Author = element  
 Experiment = single\_pulse.ex2  
 Sample\_id = S#658283  
 Solvent = CHLOROFORM-D  
 Creation\_time = 25-OCT-2015 17:46:39  
 Revision\_time = 25-OCT-2015 18:24:09  
 Current\_time = 25-OCT-2015 18:24:10

Comment = single\_pulse  
 Data\_format = 1D COMPLEX  
 Dim\_size = 13107  
 Dim\_title = 1H  
 Dim\_units = [ppm]  
 Dimensions = X  
 Site = ECS 400  
 Spectrometer = JNM-ECS400

Field\_strength = 9.20197068[T] (390[MH  
 X\_acq\_duration = 2.228224[s]  
 X\_domain = 1H  
 X\_freq = 391.78655441[MHz]  
 X\_offset = 5[ppm]  
 X\_points = 16384  
 X\_prescans = 1  
 X\_resolution = 0.44878791[Hz]  
 X\_sweep = 7.35294118[kHz]  
 Irr\_domain = 1H  
 Irr\_freq = 391.78655441[MHz]  
 Irr\_offset = 5[ppm]  
 Tri\_domain = 1H  
 Tri\_freq = 391.78655441[MHz]  
 Tri\_offset = 5[ppm]  
 Clipped = FALSE  
 Mod\_return = 1  
 Scans = 8  
 Total\_scans = 8

X\_90\_width = 10.7[us]  
 X\_acq\_time = 2.228224[s]  
 X\_angle = 45[deg]  
 X\_atn = 1.9[dB]  
 X\_pulse = 5.35[us]  
 Irr\_mode = Off  
 Tri\_mode = Off  
 Dante\_presat = FALSE  
 Initial\_wait = 1[s]  
 Recvr\_gain = 44  
 Relaxation\_delay = 5[s]  
 Repetition\_time = 7.228224[s]  
 Temp\_get = 18.8[dc]

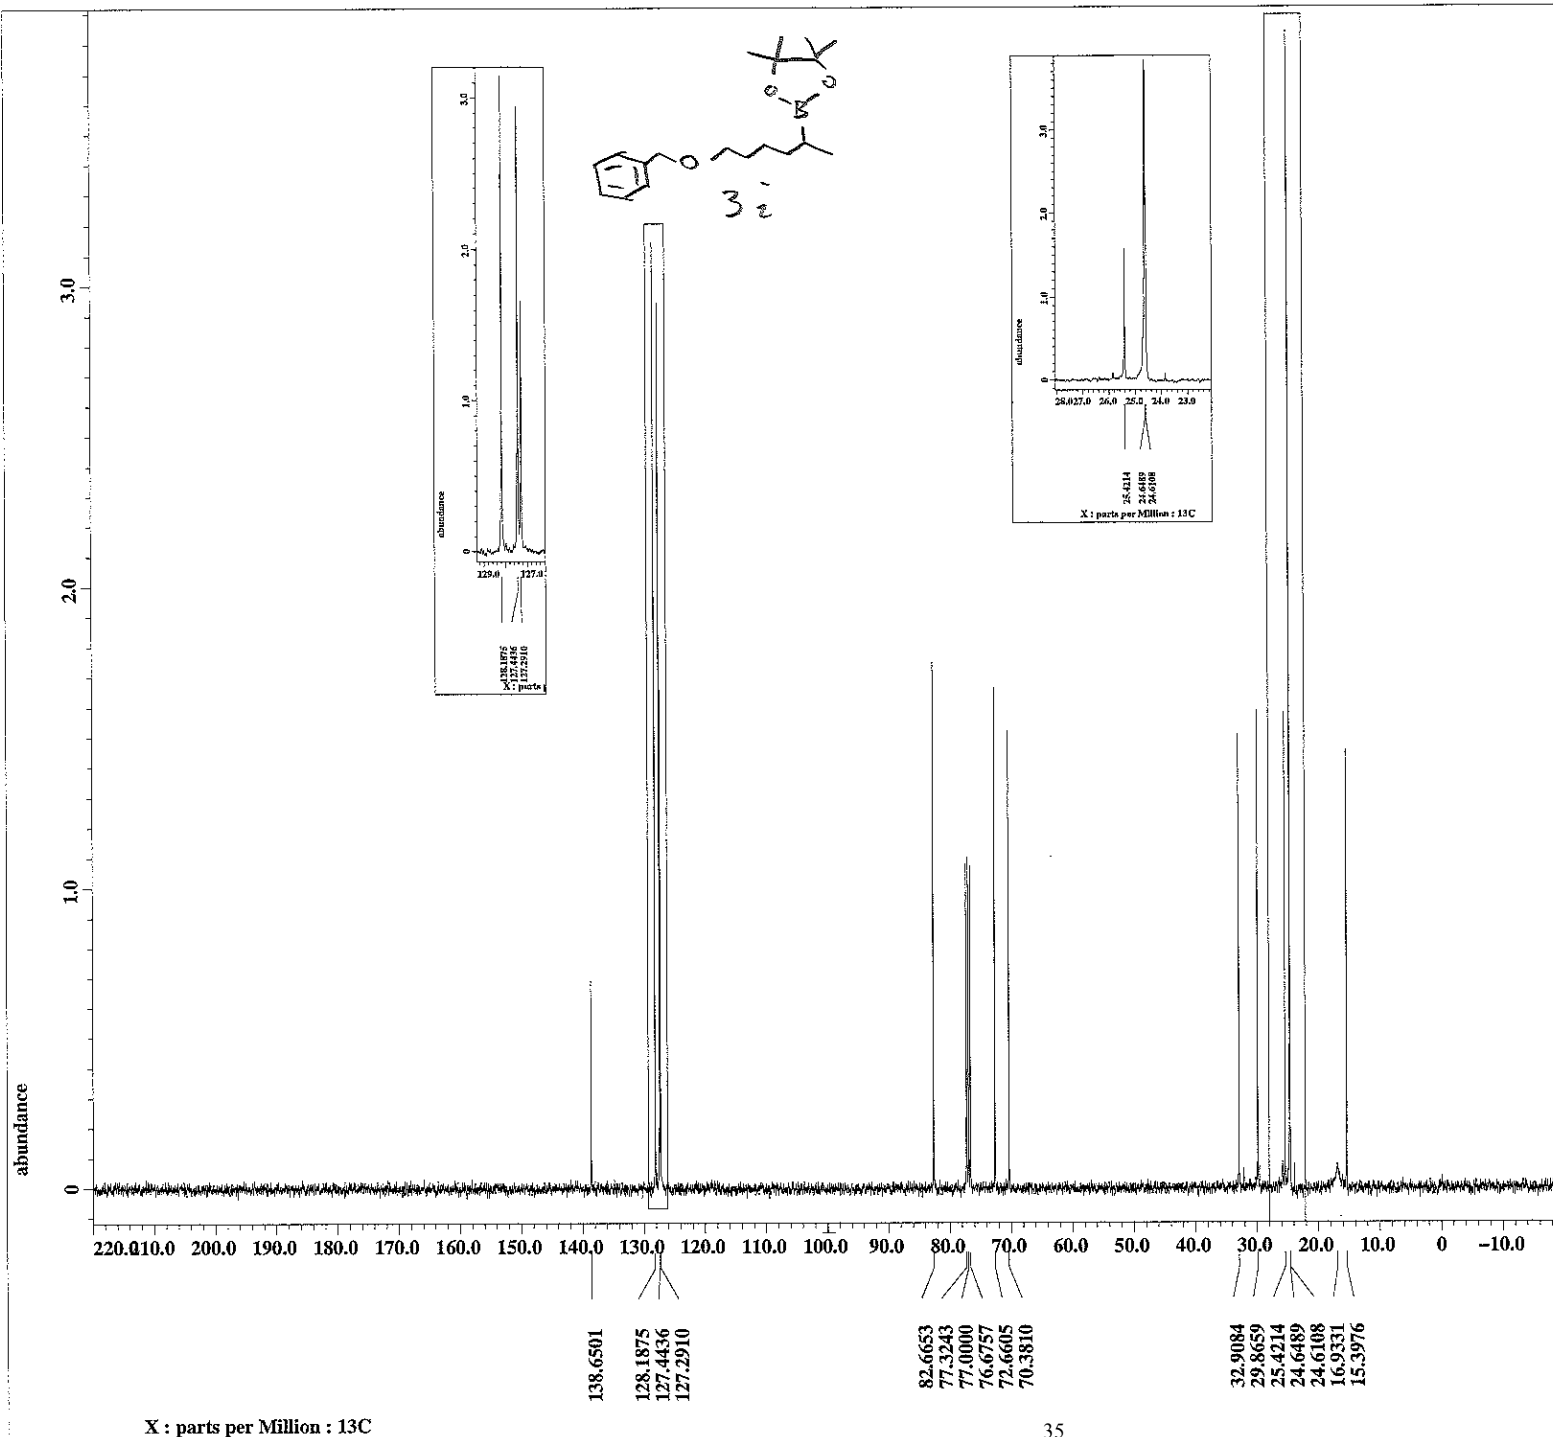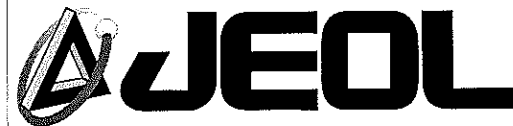

----- PROCESSING PARAMETERS -----  
 dc\_balance : 0 : FALSE  
 sexp : 2.0[Hz] : 0.0[s]  
 trapezoid3 : 0[%] : 80[%] : 100[%]  
 zerofill : 1  
 fft : 1 : TRUE : TRUE  
 machinephase  
 ppm

Derived from: IWA-853-carbon-1.jdf

Filename = IWA-853-carbon-3.jdf  
 Author = element  
 Experiment = single\_pulse\_dec  
 Sample\_id = S#661948  
 Solvent = CHLOROFORM-D  
 Creation\_time = 25-OCT-2015 17:53:47  
 Revision\_time = 25-OCT-2015 18:28:19  
 Current\_time = 25-OCT-2015 18:29:42

Comment = single pulse decouple  
 Data\_format = 1D COMPLEX  
 Dim\_size = 26214  
 Dim\_title = 13C  
 Dim\_units = [ppm]  
 Dimensions = X  
 Site = ECS 400  
 Spectrometer = JNM-ECS400

Field\_strength = 9.20197068[T] (390[MH  
 X\_acq\_duration = 1.06430464[s]  
 X\_domain = 13C  
 X\_freq = 98.51479726[MHz]  
 X\_offset = 100[ppm]  
 X\_points = 32768  
 X\_prescans = 4  
 X\_resolution = 0.93958061[Hz]  
 X\_sweep = 30.78817734[kHz]  
 Irr\_domain = 1H  
 Irr\_freq = 391.78655441[MHz]  
 Irr\_offset = 5[ppm]  
 Clipped = FALSE  
 Mod\_return = 1  
 Scans = 46  
 Total\_scans = 46

X\_90\_width = 8.8[us]  
 X\_acq\_time = 1.06430464[s]  
 X\_angle = 30[deg]  
 X\_atn = 4.9[dB]  
 X\_pulse = 2.93333333[us]  
 Irr\_atn\_dec = 22.52628[dB]  
 Irr\_atn\_noe = 22.52628[dB]  
 Irr\_noise = WALTZ  
 Decoupling = TRUE  
 Initial\_wait = 1[s]  
 Noe = TRUE  
 Noe\_time = 2[s]  
 Recvr\_gain = 60  
 Relaxation\_delay = 2[s]  
 Repetition\_time = 3.06430464[s]  
 Temp\_get = 18.8[dC]

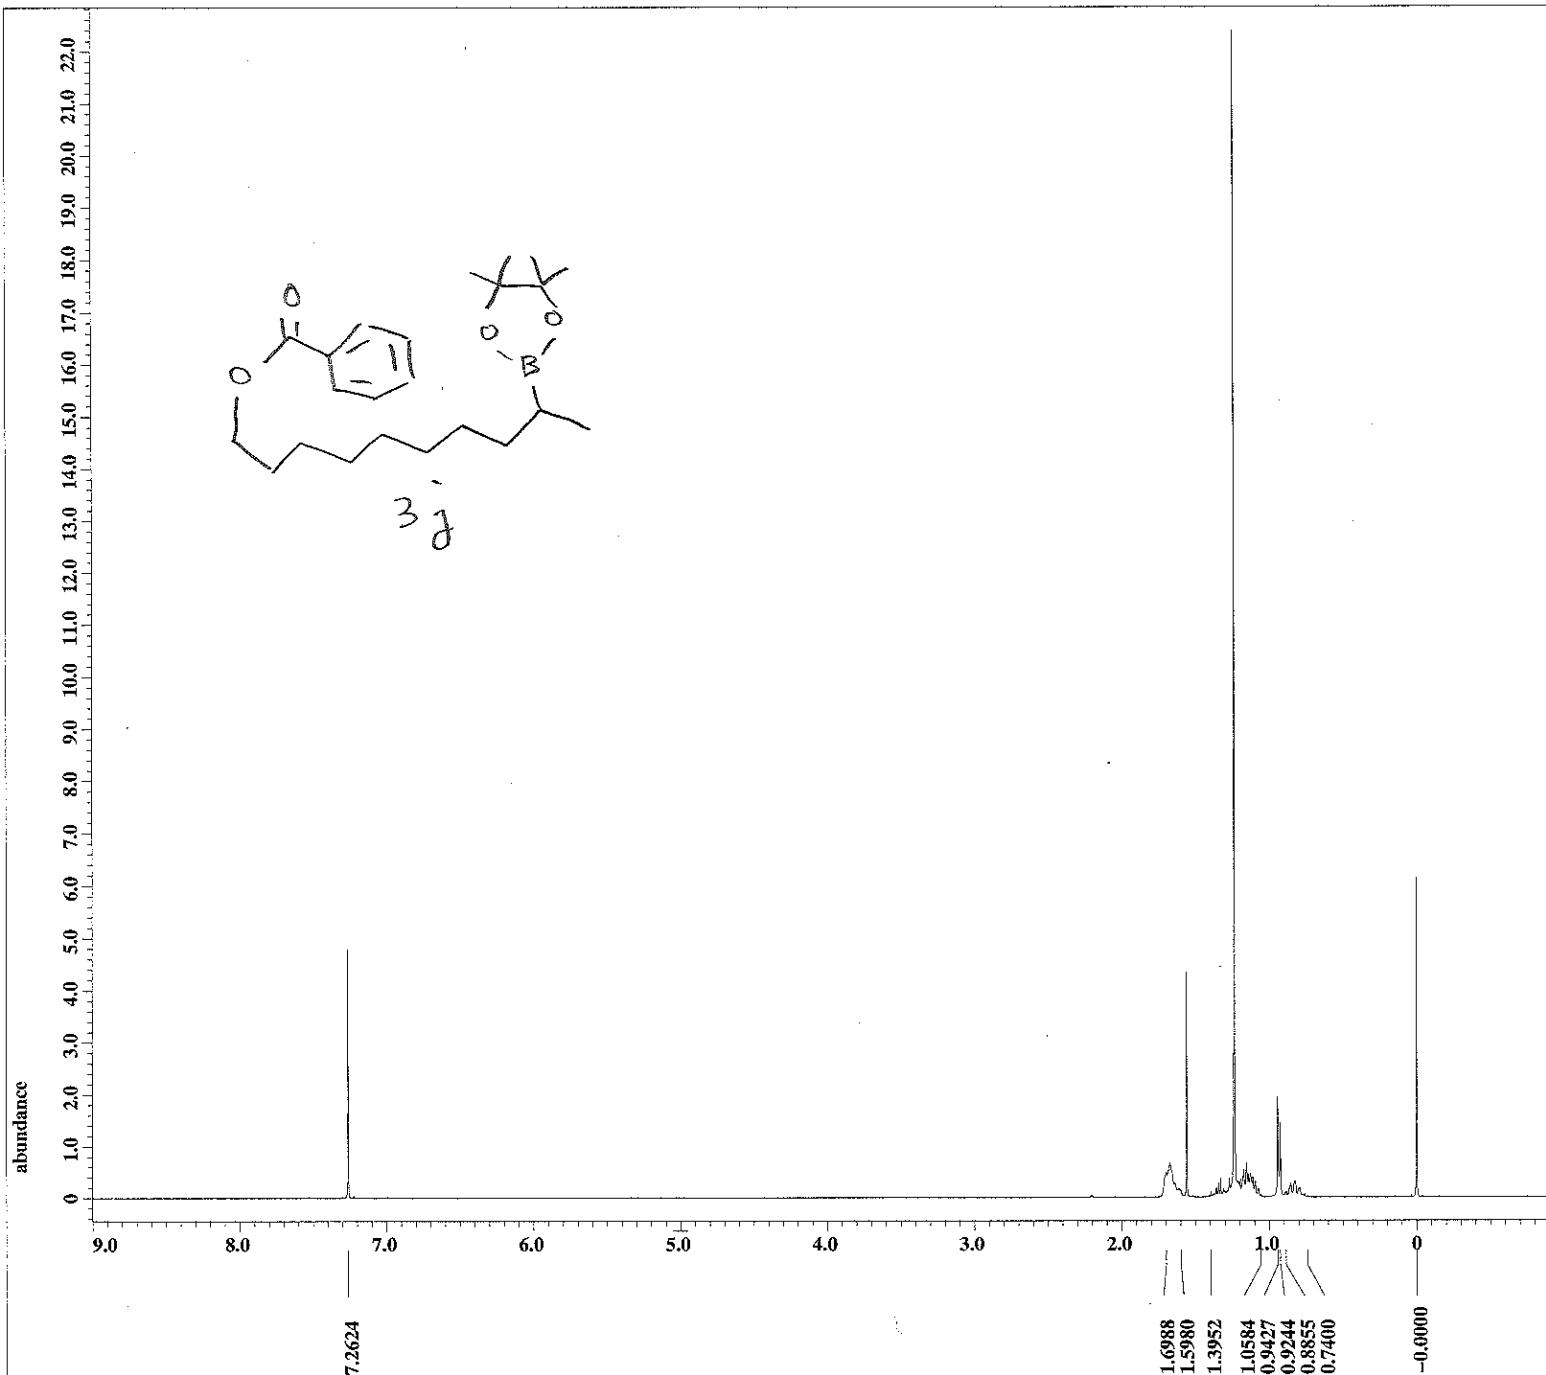

X : parts per Million : 1H

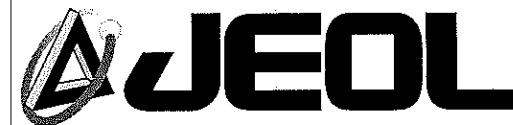

----- PROCESSING PARAMETERS -----  
 dc\_balance : 0 : FALSE  
 secp : 0.2[Hz] : 0.0[s]  
 trapezoid3 : 0[%] : 80[%] : 100[%]  
 zerofill : 1  
 fft : 1 : TRUE : TRUE  
 machinephase  
 ppm

Derived from: IWA-872-pure-1.jdf

Filename = IWA-872-pure-3.jdf  
 Author = element  
 Experiment = single\_pulse.ex2  
 Sample\_id = S#730205  
 Solvent = CHLOROFORM-D  
 Creation\_time = 7-NOV-2015 19:44:29  
 Revision\_time = 4-DEC-2015 20:36:20  
 Current\_time = 4-DEC-2015 20:36:21

Comment = single\_pulse  
 Data\_format = 1D COMPLEX  
 Dim\_size = 13107  
 Dim\_title = 1H  
 Dim\_units = [ppm]  
 Dimensions = X  
 Site = ECS 400  
 Spectrometer = JNM-ECS400

Field\_strength = 9.20197068[T] (390[MH]  
 X\_acq\_duration = 2.228224[s]  
 X\_domain = 1H  
 X\_freq = 391.78655441[MHz]  
 X\_offset = 5[ppm]  
 X\_points = 16384  
 X\_prescans = 1  
 X\_resolution = 0.44878791[Hz]  
 X\_sweep = 7.35294118[kHz]  
 Irr\_domain = 1H  
 Irr\_freq = 391.78655441[MHz]  
 Irr\_offset = 5[ppm]  
 Tri\_domain = 1H  
 Tri\_freq = 391.78655441[MHz]  
 Tri\_offset = 5[ppm]  
 Clipped = FALSE  
 Mod\_return = 1  
 Scans = 8  
 Total\_scans = 8

X\_90\_width = 10.7[us]  
 X\_acq\_time = 2.228224[s]  
 X\_angle = 45[deg]  
 X\_atn = 1.9[dB]  
 X\_pulse = 5.35[us]  
 Irr\_mode = Off  
 Tri\_mode = Off  
 Dante\_presat = FALSE  
 Initial\_wait = 1[s]  
 Recvr\_gain = 46  
 Relaxation\_delay = 5[s]  
 Repetition\_time = 7.228224[s]  
 Temp\_get = 20.9[dc]

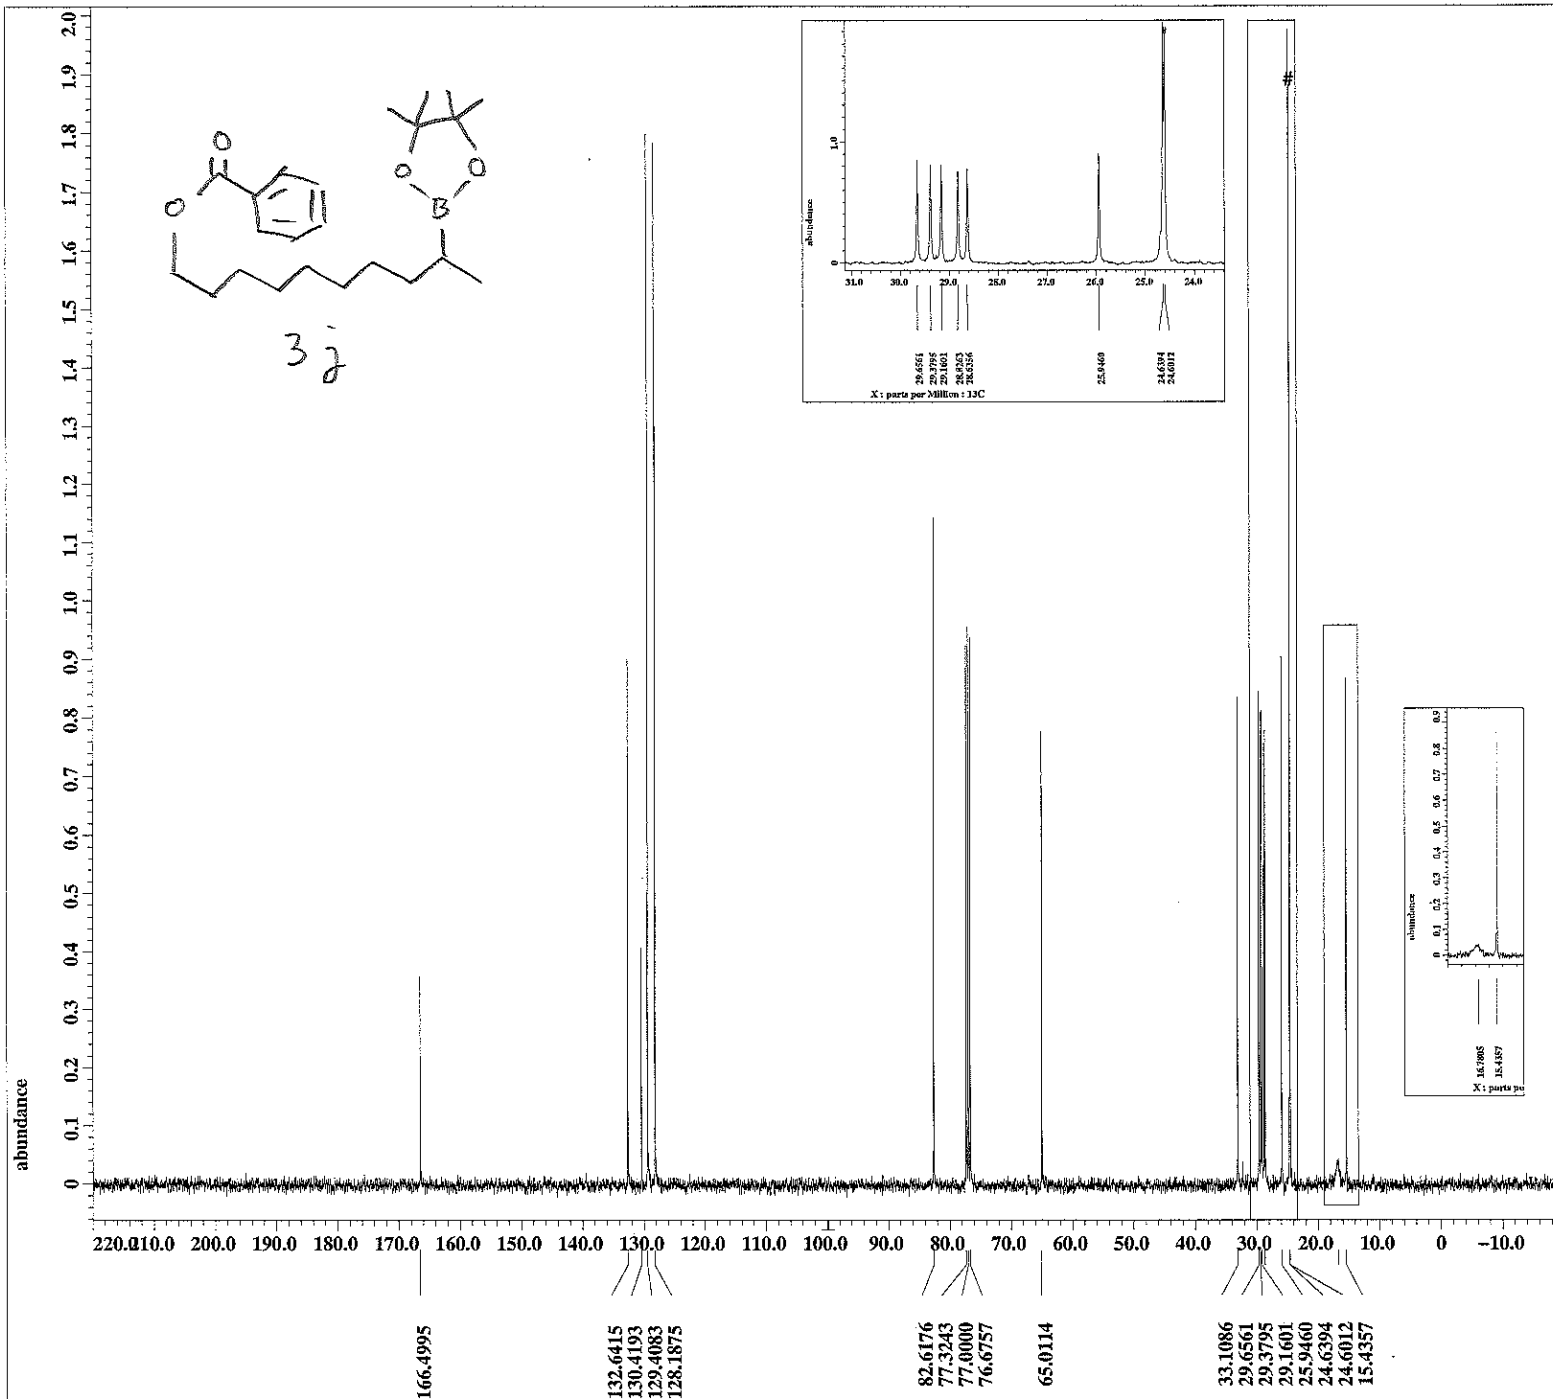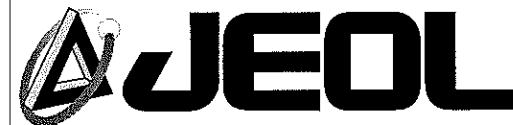

----- PROCESSING PARAMETERS -----  
 dc\_balance : 0 : FALSE  
 secp : 2.0[Hz] : 0.0[s]  
 trapezoid3 : 0[%] : 80[%] : 100[%]  
 zerofill : 1  
 fft : 1 : TRUE : TRUE  
 machinephase  
 ppm

Derived from: IWA-859-carbon-1.jdf

Filename = IWA-859-carbon-4.jdf  
 Author = element  
 Experiment = single\_pulse\_dec  
 Sample\_id = S#747743  
 Solvent = CHLOROFORM-D  
 Creation\_time = 28-OCT-2015 20:19:26  
 Revision\_time = 28-OCT-2015 20:53:34  
 Current\_time = 28-OCT-2015 20:55:18

Comment = single pulse decouple  
 Data\_format = 1D COMPLEX  
 Dim\_size = 26214  
 Dim\_title = 13C  
 Dim\_units = [ppm]  
 Dimensions = X  
 Site = ECS 400  
 Spectrometer = JNM-ECS400

Field\_strength = 9.20197068[T] (390[MH]  
 X\_acq\_duration = 1.06430464[s]  
 X\_domain = 13C  
 X\_freq = 98.51479726[MHz]  
 X\_offset = 100[ppm]  
 X\_points = 32768  
 X\_prescans = 4  
 X\_resolution = 0.93958061[Hz]  
 X\_sweep = 30.78817734[kHz]  
 Irr\_domain = 1H  
 Irr\_freq = 391.78655441[MHz]  
 Irr\_offset = 5[ppm]  
 Clipped = FALSE  
 Mod\_return = 1  
 Scans = 107  
 Total\_scans = 107

X\_90\_width = 8.8[us]  
 X\_acq\_time = 1.06430464[s]  
 X\_angle = 30[deg]  
 X\_atn = 4.9[db]  
 X\_pulse = 2.93333333[us]  
 Irr\_atn\_dec = 22.52628[db]  
 Irr\_atn\_noe = 22.52628[db]  
 Irr\_noise = WALTZ  
 Decoupling = TRUE  
 Initial\_wait = 1[s]  
 Noe = TRUE  
 Noe\_time = 2[s]  
 Recvr\_gain = 60  
 Relaxation\_delay = 2[s]  
 Repetition\_time = 3.06430464[s]  
 Temp\_get = 20.8[dc]

X: parts per Million : 13C

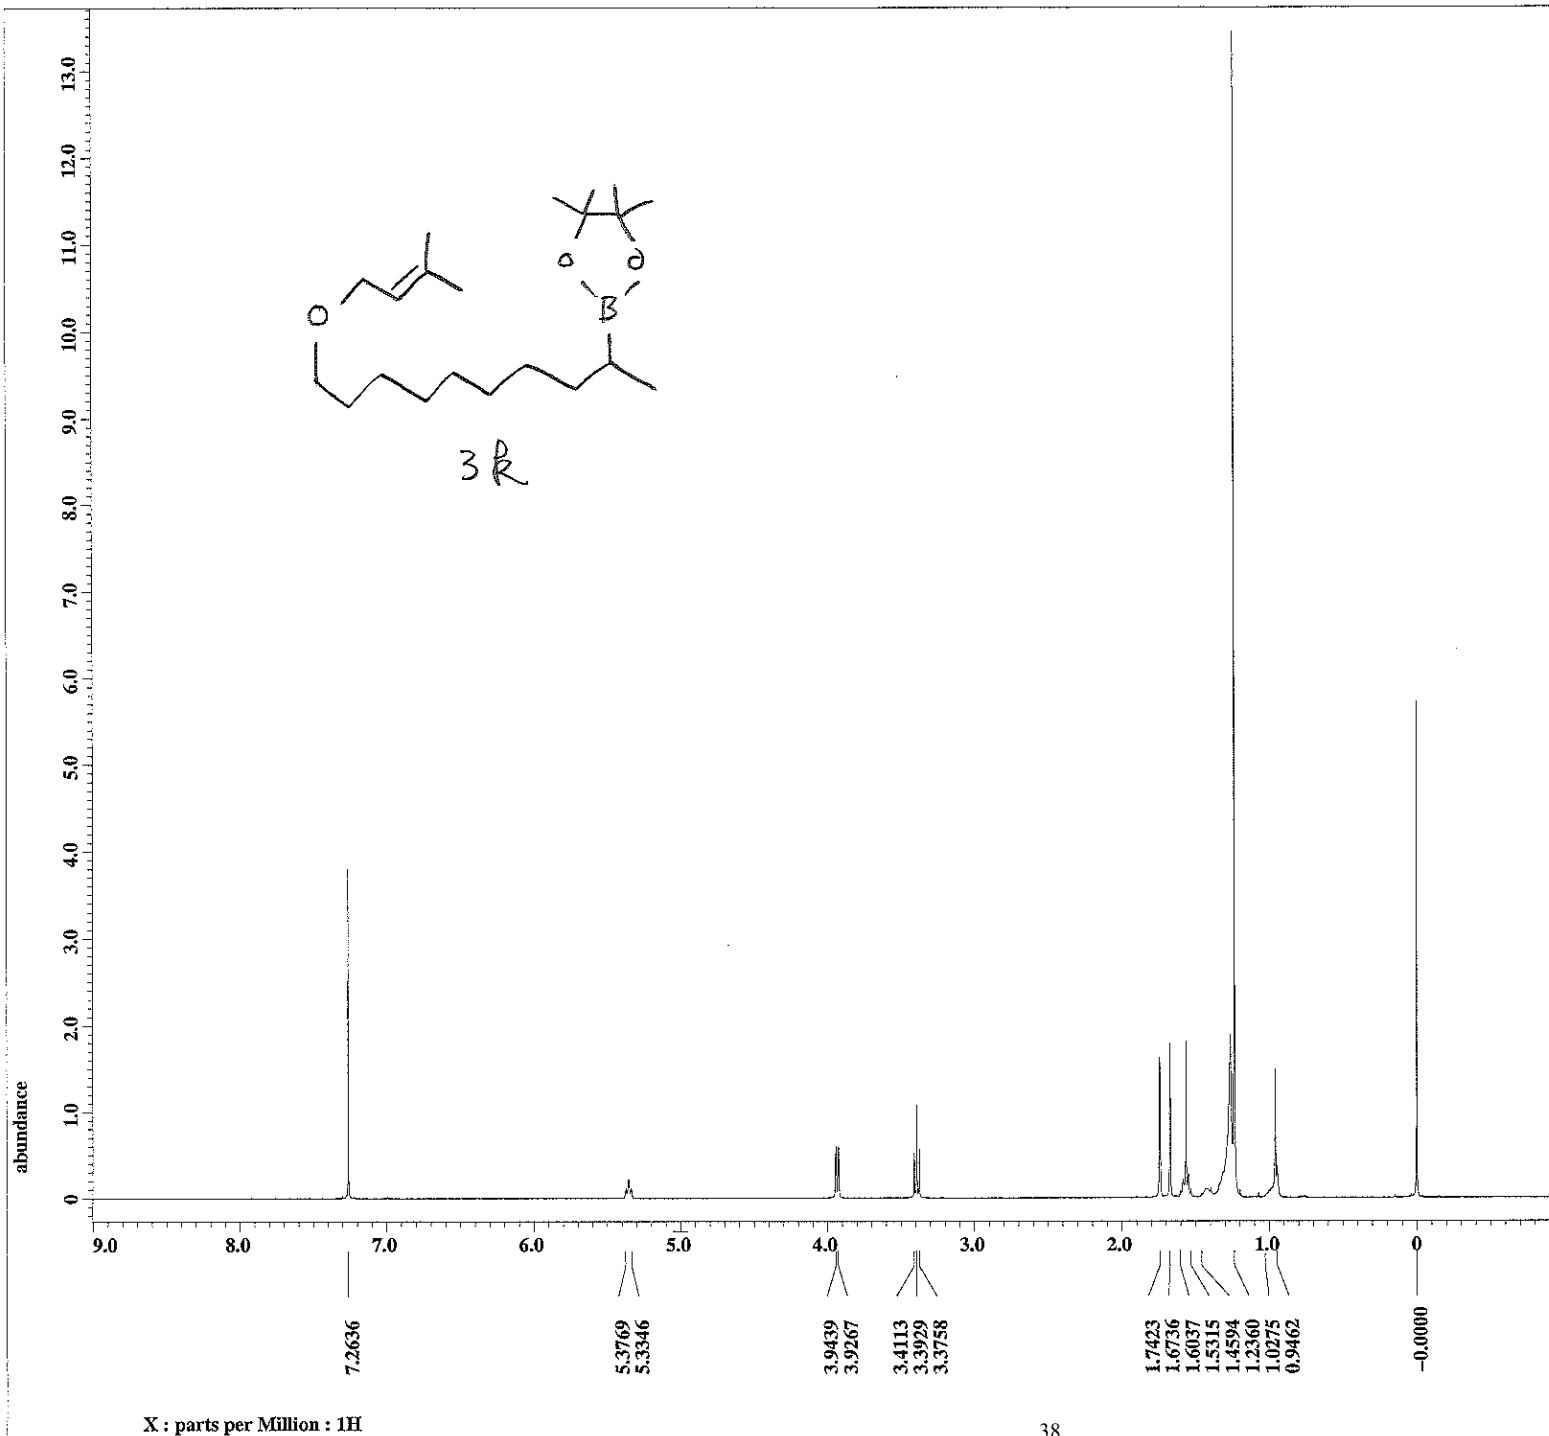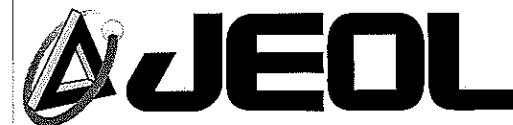

----- PROCESSING PARAMETERS -----  
 dc\_balance : 0 : FALSE  
 secp : 0.2[Hz] : 0.0[s]  
 trapezoid3 : 0[%] : 80[%] : 100[%]  
 zerofill : 1  
 fft : 1 : TRUE : TRUE  
 machinephase  
 ppm

Derived from: IWA-857-pure-1.jdf

Filename = IWA-857-pure-3.jdf  
 Author = element  
 Experiment = single\_pulse.ex2  
 Sample\_id = S#667969  
 Solvent = CHLOROFORM-D  
 Creation\_time = 28-OCT-2015 18:02:09  
 Revision\_time = 28-OCT-2015 18:42:24  
 Current\_time = 28-OCT-2015 18:42:29

Comment = single\_pulse  
 Data\_format = 1D\_COMPLEX  
 Dim\_size = 13107  
 Dim\_title = 1H  
 Dim\_units = [ppm]  
 Dimensions = X  
 Site = ECS 400  
 Spectrometer = JNM-ECS400

Field\_strength = 9.20197068[T] (390[MH]  
 X\_acq\_duration = 2.228224[s]  
 X\_domain = 1H  
 X\_freq = 391.78655441[MHz]  
 X\_offset = 5[ppm]  
 X\_points = 16384  
 X\_prescans = 1  
 X\_resolution = 0.44878791[Hz]  
 X\_sweep = 7.35294118[kHz]  
 Irr\_domain = 1H  
 Irr\_freq = 391.78655441[MHz]  
 Irr\_offset = 5[ppm]  
 Tri\_domain = 1H  
 Tri\_freq = 391.78655441[MHz]  
 Tri\_offset = 5[ppm]  
 Clipped = FALSE  
 Mod\_return = 1  
 Scans = 8  
 Total\_scans = 8

X\_90\_width = 10.7[us]  
 X\_acq\_time = 2.228224[s]  
 X\_angle = 45[deg]  
 X\_atn = 1.9[db]  
 X\_pulse = 5.35[us]  
 Irr\_mode = Off  
 Tri\_mode = Off  
 Dante\_presat = FALSE  
 Initial\_wait = 1[s]  
 Recvr\_gain = 44  
 Relaxation\_delay = 5[s]  
 Repetition\_time = 7.228224[s]  
 Temp\_get = 18.7[dC]

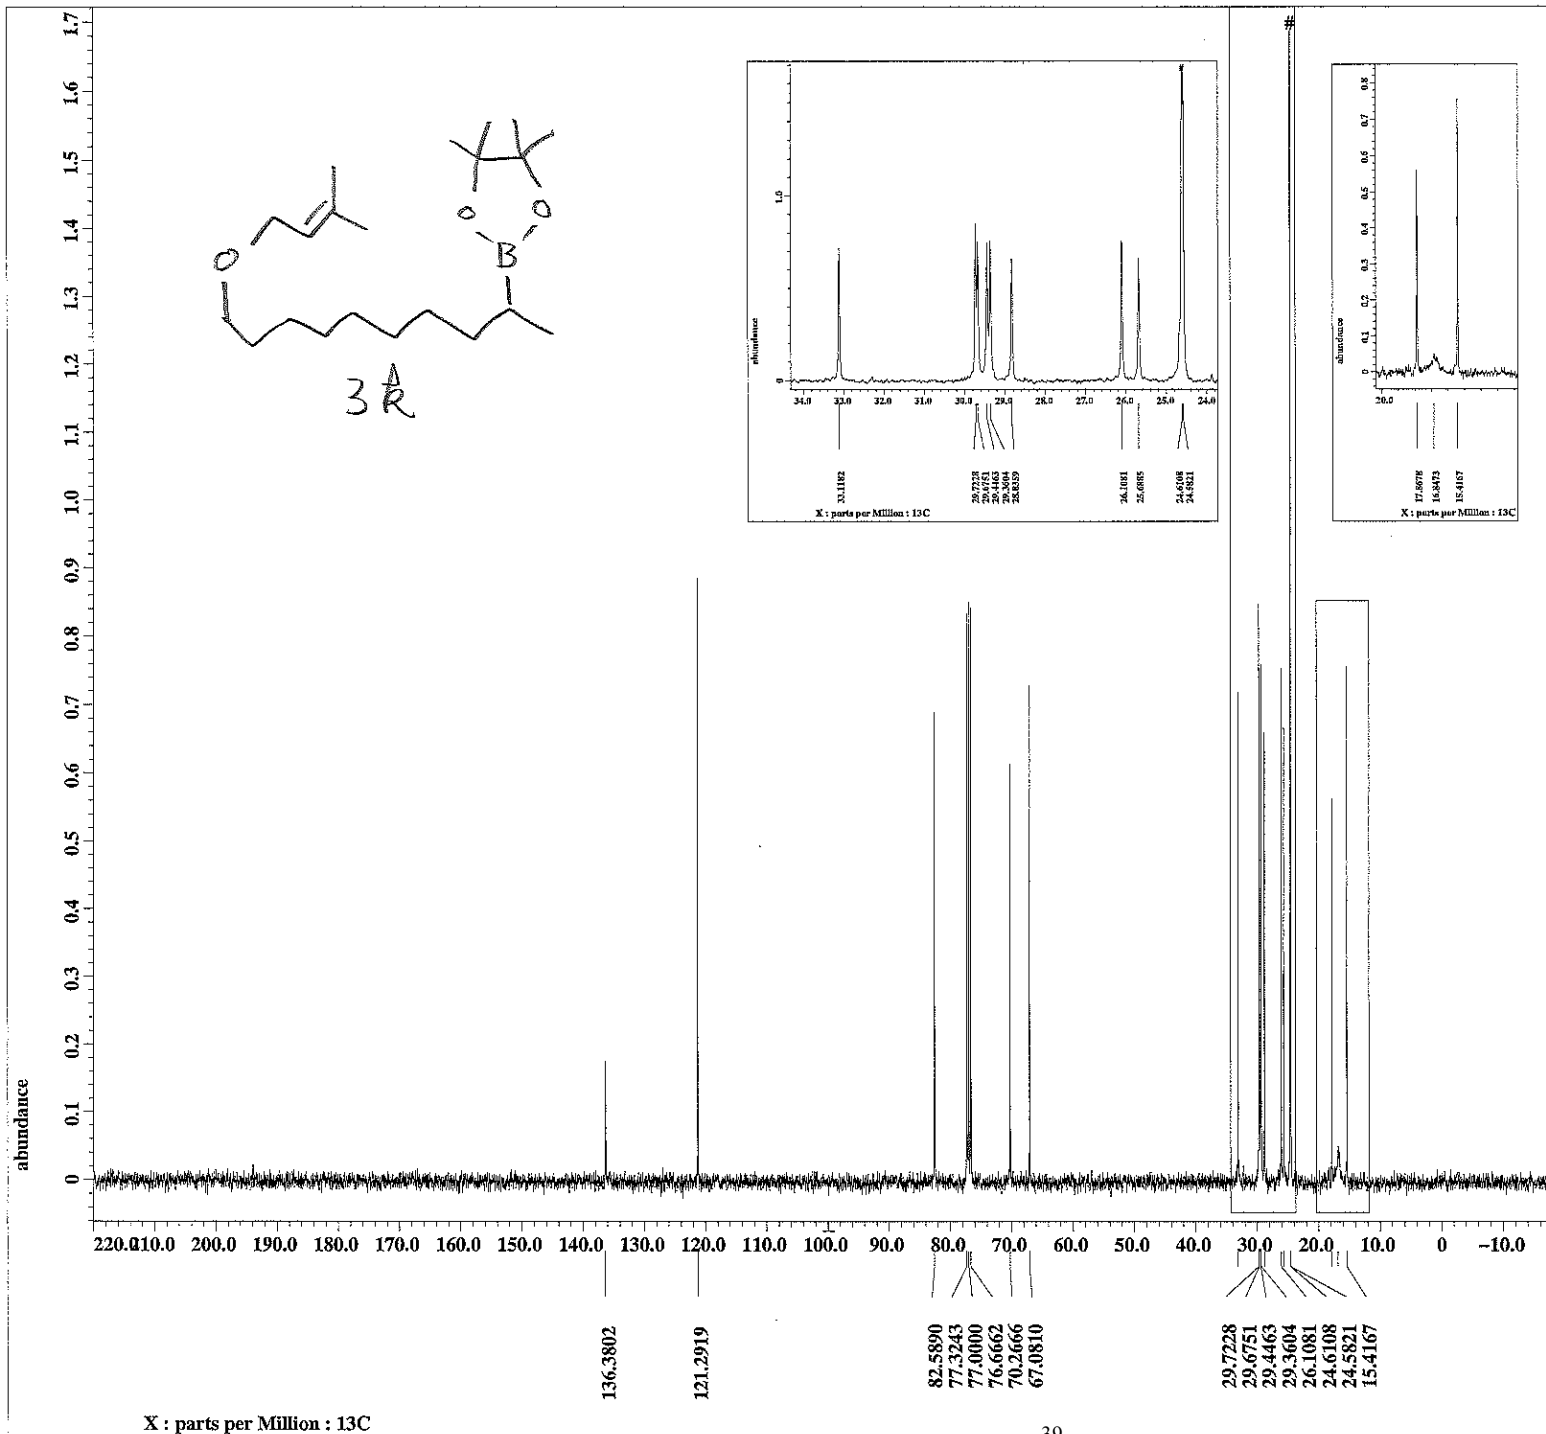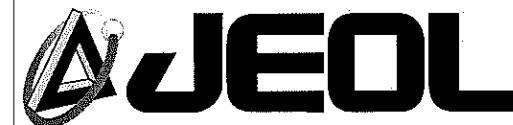

----- PROCESSING PARAMETERS -----  
 dc\_balance : 0 : FALSE  
 secp : 2.0[Hz] : 0.0[s]  
 trapezoid3 : 0[%] : 80[%] : 100[%]  
 zerofill : 1  
 fft : 1 : TRUE : TRUE  
 machinephase  
 ppm

Derived from: IWA-857-carbon-1.jdf

Filename = IWA-857-carbon-3.jdf  
 Author = element  
 Experiment = single\_pulse\_dec  
 Sample\_id = S#671432  
 Solvent = CHLOROFORM-D  
 Creation\_time = 28-OCT-2015 18:11:56  
 Revision\_time = 28-OCT-2015 18:46:08  
 Current\_time = 28-OCT-2015 18:48:07

Comment = single pulse decouple  
 Data\_format = 1D COMPLEX  
 Dim\_size = 26214  
 Dim\_title = 13C  
 Dim\_units = [ppm]  
 Dimensions = X  
 Site = ECS 400  
 Spectrometer = JNM-ECS400

Field\_strength = 9.20197068[T] (390[MH  
 X\_acq\_duration = 1.06430464[s]  
 X\_domain = 13C  
 X\_freq = 98.51479726[MHz]  
 X\_offset = 100[ppm]  
 X\_points = 32768  
 X\_prescans = 4  
 X\_resolution = 0.93958061[Hz]  
 X\_sweep = 30.78817734[kHz]  
 Irr\_domain = 1H  
 Irr\_freq = 391.78655441[MHz]  
 Irr\_offset = 5[ppm]  
 Clipped = FALSE  
 Mod\_return = 1  
 Scans = 100  
 Total\_scans = 100

X\_90\_width = 8.8[us]  
 X\_acq\_time = 1.06430464[s]  
 X\_angle = 30[deg]  
 X\_atn = 4.9[dB]  
 X\_pulse = 2.93333333[us]  
 Irr\_atn\_dec = 22.52628[dB]  
 Irr\_atn\_noe = 22.52628[dB]  
 Irr\_noise = WALTZ  
 Decoupling = TRUE  
 Initial\_wait = 1[s]  
 Noe = TRUE  
 Noe\_time = 2[s]  
 Recvr\_gain = 60  
 Relaxation\_delay = 2[s]  
 Repetition\_time = 3.06430464[s]  
 Temp\_get = 18.8[degC]
